# Supplementary material
Source: PubMed Central journal article supplement (PMC7047269)
Supplement: oc9b00021_si_001.pdf [file oc9b00021_si_001.pdf]

# Sequential Glycosylation of Proteins with Substrate-Specific N-Glycosyltransferases

Liang Lin<sup>#,1,2</sup>, Weston Kightlinger<sup>#,2,3</sup>, Sunaina Kiran Prabhu<sup>4</sup>, Adam J. Hockenberry<sup>5</sup>, Chao Li<sup>4</sup>, Lai-Xi Wang<sup>5</sup>, Michael C. Jewett<sup>\*,2,3</sup>, and Milan Mrksich<sup>\*,1,2,3,6</sup>

#These authors contributed equally to the work.

<sup>1</sup>Department of Biomedical Engineering, <sup>2</sup>Center for Synthetic Biology, <sup>3</sup>Department of Chemical and Biological Engineering, <sup>5</sup>Interdisciplinary Biological Sciences Program, <sup>6</sup>Department of Chemistry

Northwestern University, 2145 Sheridan Road, Evanston, IL 60208

<sup>4</sup>Department of Chemistry and Biochemistry

University of Maryland, College Park, MD 20742

\*Corresponding authors:

Milan Mrksich, 2145 Sheridan Road, Tech-B492, Evanston IL 60208-3109,  
milan.mrksich@northwestern.edu; Tel (+1) 847 467 0472; Fax: (+1) 847 491 4928  
Michael C. Jewett, 2145 Sheridan Road, Tech E-136, Evanston, IL 60208-3120;  
m-jewett@northwestern.edu; Tel: (+1) 847 467 5007; Fax: (+1) 847 491 3728

## Supplementary Information Table of Contents

|                                        |           |
|----------------------------------------|-----------|
| <b>Methods.....</b>                    | <b>1</b>  |
| <b>Supplementary Tables 1-6.....</b>   | <b>11</b> |
| <b>Supplementary Figures 1-25.....</b> | <b>17</b> |
| <b>Supplementary Note 1.....</b>       | <b>44</b> |

## **Supplementary Information:**

### **Methods**

**Phylogenetic analysis of putative NGTs.** We first performed a preliminary phylogenetic analysis of the entire family 41 of the CAZY database<sup>1</sup> (access date: November 2016) by extracting 600 C-terminal residues from each protein, aligning the resulting sequences using MAFFT (v7.380)<sup>2</sup> and using FastTree (v2.1.10)<sup>3</sup> to rapidly construct a phylogenetic tree describing the relatedness of all these sequences (1,409 in total). After manual visual inspection of this large tree, we selected 41 sequences for further characterization according to criteria mentioned in the main text. We further refined the relationship between these 41 selected sequences by using MAFFT (L-INS-i method) to align the entire annotated coding sequence from each of these proteins. Next, we used RAxML (v8.1.3)<sup>4</sup> to perform 100 rapid bootstraps and a thorough maximum-likelihood search for the best phylogenetic tree using the LG substitution matrix, gamma distributed rate variation, and the human OGT as the outgroup. Visualization of all trees was performed using the iTol webserver<sup>5</sup>.

**Peptide synthesis.** All peptide libraries were *N*-acetyl and *C*-Amide protected, and were synthesized as previously described<sup>6</sup>. For the unprotected peptides used in the ionization factor of trypsinized GlycTags in Im7, Arg-Wang resin (AAPPTEC, USA) was used and the synthesis steps was the same as above<sup>6</sup> except that there was no need for the first Arginine addition or acetic anhydride treatment for *N*-acetyl protection. These peptides were purified with HPLC and used for ionization factor analysis by LC-qTOF.

**SAMDI.** The preparation of SAMDI plates and peptide arrays for SAMDI profiling were completed as previously described<sup>6</sup>. Briefly, 50  $\mu$ M peptide was reacted with the indicated concentration of NGT and 2.5 mM UDP-Glc in 100 mM HEPES (pH 8.0) and 500 mM NaCl at 30 °C for indicated time. Next, 2  $\mu$ L TCEP-resin (Pierce) was added to each 10  $\mu$ L reaction solution and the solution was incubated at 37 °C for 1 h. 2  $\mu$ L of this solution was then added onto a 384-well SAMDI plate with 0.5 h incubation for peptide immobilization. After washing the plate, MS spectra were acquired using a MALDI-TOF (AB SCIEX 5800 TOF/TOF). All peptide specificity heatmaps presented in this study except **Fig. 2a** indicate the % glucose modification, which was calculated by adjusting the ratio of substrate and glucose modified peptide products in MS spectra by the average ionization factor (shown in **Supplementary Table 4**) and also described previously<sup>6</sup>. **Fig. 2a**, shows the unadjusted percent intensity of substrate and glycopeptide products, Product/(Substrate+Product). All percentage glucose modifications of less than 0.02 were regarded as background noise.

SAMDI screens for NGT sugar donor specificities were performed similarly to peptide specificity screens. Briefly, 1 mM of sugar donor UDP-Glc, UDP-Gal, UDP-Xyl, UDP-GlcN, GDP-Man, UDP-GlcNAc, or UDP-GalNAc was reacted with indicated NGTs and one of six representative peptides. The completed reactions were analyzed by SAMDI-MS. Unadjusted percent intensities of substrate and glycopeptide products are presented as heatmaps in **Supplementary Fig. 11**. All percentage intensities of  $\geq 0.01$  are above background noise and indicative of real modification.

**Orthogonality analysis.** Heatmaps showing potential orthogonality of NGTs from the analysis of HiNGT, EcNGT, ApNGT, and ApNGT<sup>Q469A</sup> with X<sub>-1</sub>-N-X<sub>+1</sub>-S/T peptide library are shown in **Supplementary Figs. 5 and 6**. Calculations are described below. In order to more easily determine differences in specificity across NGTs with different specific activities, reaction conditions were controlled to obtain a maximum modification of ~85% across the whole substrate library for all NGTs (**Supplementary Fig. 4**). Differences in %modification from **Supplementary Fig. 4** were then used to determine potentially orthogonal peptides. For example, the %modification (HiNGT - EcNGT) was calculated and a value of greater than 50% was considered a good substrate for HiNGT over EcNGT, and if the ratio of the (HiNGT - EcNGT) value to %modification (HiNGT) was over 90% then the peptide was considered to be potentially orthogonal for HiNGT over EcNGT. HiNGT was then considered to be potentially orthogonal over EcNGT. Similarly, to determine sequences modified by HiNGT with orthogonality over EcNGT and ApNGT, the %modification of (HiNGT - EcNGT - ApNGT) was calculated, and so forth.

To identify and determine conditional orthogonality for specific NGT-substrate pairs, peptide libraries were reacted with in an order of HiNGT, EcNGT, ApNGT, and then ApNGT<sup>Q469A</sup>, under optimized conditions such that each NGT would have at least one peptide having 90% more modification over preceding NGTs. First, the whole peptide library was arranged in descending order by the value of %modification (ApNGT<sup>Q469A</sup> - ApNGT - EcNGT - HiNGT); then peptides with a value less than 5% for %modification (ApNGT<sup>Q469A</sup> - ApNGT - EcNGT - HiNGT) were arranged in descending order by the %modification (ApNGT - EcNGT - HiNGT); then the peptides with a value less than 5% for %modification (ApNGT - EcNGT - HiNGT) were arranged in descending order by the %modification (EcNGT - HiNGT); and finally, the peptides with a value less than 5% for %modification (EcNGT - HiNGT) were arranged by the %modification (HiNGT). In this way, the peptides were divided into ApNGT<sup>Q469A</sup> preferred, ApNGT preferred, EcNGT preferred, and HiNGT preferred. NGT-GlycTag pairs were then chosen from the left part of each NGT preferred region.

**Plasmid construction and molecular cloning.** Sources and details of plasmids used in this paper are shown in **Supplementary Tables 1 and 2**. Selected coding sequences with plasmid context are shown in **Supplementary Note 1**. DNA templates to produce

NGT homologs in CFPS were generated from codon-optimized gene fragments synthesized by Twist Bioscience, IDT, or Life Technologies which were either synthesized in or assembled into a pJL1 *in vitro* expression vector backbone<sup>6</sup> between NdeI and Sall restriction sites by Gibson Assembly<sup>7</sup>. Sequences of active NGTs YpNGT, HdNGT, MhNGT, HiNGT, EcNGT, and ApNGT were based on GenBank IDs CAL21840.1, AAP96624.1, AJE07135.1, ADO96126.1, CBL93373.1, and ABN74719.1, respectively. The ApNGT<sup>Q469A</sup> mutant was generated by inverse PCR of pJL1.ApNGT followed by a one-piece Gibson assembly. In order to lessen variability in ribosome binding site strengths and therefore total CFPS expression, some putative NGTs were modified with *N*-terminal CAT-Strep-Linker fusion sequences previously shown to increase *in vitro* expression<sup>6</sup>. Expression vectors for purification of conditionally orthogonal NGTs were generated by PCR of pJL1 plasmids carrying each homolog followed by Gibson assembly of that PCR fragment into the pET.BCS.NS *in vivo* expression backbone<sup>6</sup> with *C*-terminal Strep II or Twin-Strep II tags. The expression vector for purification of 4glm7 was synthesized by Twist Bioscience in the pET.BCS.NS vector with a *C*-terminal 6xHis-tag and four customized glycosylation sites according to SAMDI-MS characterization of the four conditionally orthogonal NGTs (full sequence shown in **Supplementary Note 1**). The expression vector for purification of SUMO-4glm7 was constructed by PCR and assembly of the 4glm7 gene fragment into a pET.28a vector with an *N*-terminal 6xHis-tag, SUMO sequence and Gly-Ser Linker to facilitate sequential glycosylation onto Ni-NTA magnetic beads and cleavage of the final product by Ulp1 (full sequence shown in **Supplementary Note 1**).

**Cell-free protein synthesis of putative NGTs.** Cell-free protein synthesis of putative NGTs was performed using the PANox-SP crude lysate system<sup>8</sup> as previously described<sup>6</sup>. Briefly, crude extracts for CFPS were prepared from a recently described high-yielding *E. coli* strains C321.ΔA.759<sup>9</sup> or BL21 Star (DE3)<sup>10</sup> using well-established cell growth, harvest, and lysis conditions<sup>6, 9-10</sup>. C321.ΔA.759 *E. coli* cells were grown in 1 L of 2xYTPG media (yeast extract 10 g/L, tryptone 16 g/L, NaCl 5 g/L, K<sub>2</sub>HPO<sub>4</sub> 7 g/L, KH<sub>2</sub>PO<sub>4</sub> 3 g/L, and glucose 18 g/L, pH 7.2) in a 2.5 L Tunair flask at 34 °C and 250 r.p.m. to OD<sub>600</sub> = 3.0 then pelleted by centrifugation at 5,000xg at 4 °C for 15 min. The pellets were then washed three times with cold S30 buffer (10 mM Tris–acetate pH 8.2, 14 mM magnesium acetate, 60 mM potassium acetate, and 2 mM dithiothreitol (DTT)) before being frozen on liquid nitrogen and stored at -80 °C. Cells were then thawed, resuspended in 0.8 mL of S30 buffer per gram wet weight, and lysed in 1.4 mL aliquots using a Q125 Sonicator (Qsonica) for three 45 s pulses at 50% amplitude with 59 s off between pulses. After sonication, lysed cells were supplemented with 2.8 mM DTT and centrifuged at 12,000xg. This supernatant was incubated at 37 °C at 250 r.p.m. for 1 h and centrifuged at 10,000xg at 4 °C for 10 min. The clarified lysate was flash frozen and stored at -80 °C until use. The clarified S12 lysate was used to conduct CFPS reactions as previously



described<sup>6</sup>. Lysates from BL21 Star (DE3) cells were prepared similarly except that T7 production in BL21 Star (DE3) cells was induced with 1 mM IPTG at OD<sub>600</sub> = 0.6-0.8, frozen cells were resuspended in 1.0 mL per gram of cell weight, sonication was completed on 1.0 mL aliquots using 10 s on/off pulses at 50% amplitude until 640 J were delivered, and the lysate was not incubated at 37 °C and subsequently spun after sonication. A standard CFPS reaction contained 1.2 mM ATP; 0.85 mM each of GTP, UTP, and CTP; 34 µg/mL folinic acid; 170 µg/mL of *E. coli* tRNA mixture; 16 µg/mL purified T7 RNA polymerase; 2 mM for each of the 20 standard amino acids; 0.33 mM nicotinamide adenine dinucleotide (NAD); 0.27 mM coenzyme-A (CoA); 1.5 mM spermidine; 1 mM putrescine; 4 mM sodium oxalate; 130 mM potassium glutamate; 10 mM ammonium glutamate; 12 mM magnesium glutamate; 57 mM HEPES, pH 7.2; 33 mM phosphoenolpyruvate (PEP); 13.3 µg/mL NGT plasmid template; and 27% v/v of cell extract. *E. coli* total tRNA mixture (from strain MRE600) and phosphoenolpyruvate were purchased from Roche Applied Science. ATP, GTP, CTP, UTP, the 20 amino acids, and other materials were purchased from Sigma-Aldrich. No additional T7 was added to BL21 (DE3) Star CFPS reactions. Plasmid DNA for cell-free protein synthesis was purified from DH5-α *E. coli* strain (NEB) using ZymoPURE Midi Kit (Zymo Research). All NGTs were synthesized in 50 µL batch reactions in 2.0 mL centrifuge tubes. Putative NGT activity screening was completed using CFPS from BL21 Star (DE3) lysate and radioactive quantification of CFPS yields, autoradiograms, and preliminary X<sub>1</sub>NX<sub>1</sub>TRC peptide specificity screening was completed using CFPS from C321.ΔA.759 lysate. All CFPS reactions were carried out at 20 °C for 20 h.

**Quantification of CFPS yields.** CFPS yields of conditionally orthogonal NGTs were quantified by supplementing standard CFPS reactions with 10 µM <sup>14</sup>C leucine (PerkinElmer). Protein yields were quantified in triplicate using established protocols<sup>6</sup> for precipitation in 5% trichloroacetic acid (TCA) precipitation followed by radioactivity quantification using a Microbeta2 liquid scintillation counter (PerkinElmer). Soluble fractions were collected after centrifugation at 12,000xg for 15 min at 4 °C.

**Autoradiogram of CFPS products.** Autoradiograms of CFPS synthesized NGTs were prepared as previously described<sup>6</sup>. CFPS reactions supplemented with <sup>14</sup>C leucine were loaded onto a 4-12% Bolt Bis-Tris Plus SDS-PAGE gels (Invitrogen) and run in MOPS buffer at 150 V for 70 min. The gels were stained using InstantBlue (Expedeon), destained in water, dried overnight, and exposed for 48 h on a Storage Phosphor Screen (GE Healthcare). Phosphor Screens were acquired using Typhoon FLA7000 imager (GE Healthcare). Coomassie stain images of gels were acquired using a GelDoc XR+ Imager for molecular weight standard references.

**Measurement of relative ionization factors for glycopeptides on LC-MS.** Peptides identical to those observed following trypsinization of 4glm7 and SUMO-4glm7 were synthesized by SPPS, purified by HPLC, and quantified by dry weight as described above. Peptides were resuspended in water and supplemented with up to 1% formic acid and 20% ACN as necessary for soluble concentrations of 1-5 mM. Peptides were then diluted in 50 mM phosphate buffer (pH 8.0) to a working concentration of 25  $\mu$ M. Glycosylated peptide samples at 12.5  $\mu$ M concentration each were treated with 2  $\mu$ M ApNGT<sup>Q469A</sup>, 1  $\mu$ M EcNGT, and 10 mM UDP-Glc for 12 h at 30 °C and then quenched at 80 °C for 20 min. After incubation and quenching, these peptides were found to be completely glycosylated and no aglycosylated peptides could be detected. This glycosylated sample was then mixed at equimolar concentration with aglycosylated samples which had been prepped similarly without NGTs and injected into LC-qTOF using peptide analysis method described below. The relative ionization factor was calculated as previously described<sup>6</sup>.

**Protein expression and purification of glycosyltransferases and targets.** Purification of conditionally orthogonal NGTs and NmLgtB from living *E. coli* was performed using Strep-tacin XT Superflow resin (Iba Life Sciences) based on manufacturer instructions. BL21 Star (DE3) cells (Thermo Fisher Scientific) were transformed with pET.BCS.NS vectors (Carb<sup>R</sup>) bearing coding sequences for each NGT with twin or single Strep II tags or NmLgtB with a twin-strep tag. Cultures in LB media and appropriate antibiotic were inoculated from an overnight culture at an initial OD<sub>600</sub> = 0.08 and grown at 37 °C at 250 r.p.m. to 0.6–0.8 OD and induced with 1 mM isopropyl  $\beta$ -D-1-thiogalactopyranoside (IPTG) overnight at 25 °C. The cells were pelleted by centrifugation at 7,000xg for 10 min at 4 °C, resuspended in cold Buffer 1 (50 mM NaH<sub>2</sub>PO<sub>4</sub> and 300 mM NaCl at pH 8.0), and pelleted again by centrifugation at 7,000xg for 10 min, and flash frozen at -80 °C. The pellets were thawed and resuspended in 5 mL Buffer 1 per gram wet pellet weight and supplemented with 1 mg/mL lysozyme (Sigma), 25 U/mL of Benzonase (EMD Millipore), and Halt protease inhibitor before lysis by two homogenization passes (Avestin) and centrifugation at 15,000xg for 20 mins. The supernatant was added to a packed gravity flow column of 5 mL of Strep-tacin XT resin per 1 L of culture which had been equilibrated by 2 column volumes (CV) of Buffer 1. The column was then washed with 5 column volumes of Buffer 1 and then eluted in 3 CV of BXT Buffer (Buffer 1 with 50 mM biotin and 1 mM EDTA). Fractions containing at least 1 mg/mL of protein were collected and dialyzed against 50 mM HEPES, pH 7.0, 200 mM NaCl and 5% glycerol and Halt Protease overnight in a 20kDa Slide-a-lyzer cassette. After dialysis, samples were centrifuged at 12,000xg for 15 mins. NGT concentration was quantified using a Bradford assay with a BSA standard curve (Bio-rad).

Purification of engineered Im7Generalist1-4, 4glm7, SUMO-4glm7, SUMO-2glm7, SUMO-2gFc, and PdST6mut proteins were performed using Qiagen Ni-NTA agarose

based on manufacturer's instructions. BL21 Star (DE3) cells (Thermo Fisher Scientific) were transformed with pETBCS.NS.Im7Generalist1-4 (Carb<sup>R</sup>), pETBCS.NS.4gIm7 (Carb<sup>R</sup>), pET28a.SUMO-4gIm7 (Kan<sup>R</sup>), pETBCS.NS.SUMO-2gIm7 (Carb<sup>R</sup>), pETBCS.NS.SUMO-2gFc (Carb<sup>R</sup>), pJL1.PdST6mut (Kan<sup>R</sup>) vectors. Cultures were grown, induced, harvested, and lysed identically to NGTs. Following centrifugation, lysate was applied to an Ni-NTA agarose column (Qiagen) which was equilibrated with Buffer 1 with 10 mM imidazole, washed with 10 column volumes of Buffer 3 with 20 mM imidazole, and eluted with 4 column volumes of Buffer 1 with 300 mM Imidazole. Fractions containing more than 1 mg/mL of protein by Bradford assay were pooled and exhaustively dialyzed against Buffer 1 with 5% glycerol with three or more buffer exchanges. After dialysis, samples were centrifuged at 12,000xg for 15 mins and flash frozen on liquid nitrogen and stored at -80 °C until needed. Protein concentrations in the dialyzed elution fractions were quantified by SDS-PAGE densitometry using Image Lab software version 6.0.0 using a BSA standard curve following staining with InstantBlue Coomassie stain and destaining with water.

**Elaboration of glucosylated proteins by chemoenzymatic transglycosylation or enzymatic addition of monosaccharides.** As shown in **Supplementary Figs. 18-20, 22, 23** and **25**, glucoses installed by NGTs onto target proteins were chemoenzymatically elaborated to human-like biantennary glycans using endoglycosidases and oxazoline glycan donors using previously reported workflows<sup>11</sup>. Briefly, the expression and purification of EndoCC<sup>N180H</sup><sup>12</sup> and EndoA WT<sup>13</sup> was performed following reported protocols. Biantennary sialylated glycan, Sia<sub>2</sub>Gal<sub>2</sub>Man<sub>3</sub>GlcNAc oxazoline<sup>14</sup> (SCT-ox), and azido-functionalized trimannose core glycan, Man<sub>3</sub>GlcNAc oxazoline<sup>15</sup> (AzMan3-ox), were synthesized using published procedures. Mono or diglucosylated forms of Im7 were combined with EndoA-WT enzyme and AzMan3-ox before quenching with 0.1 M glycine buffer at pH=2.7. Monoglucosylated or previously elaborated forms of SUMO-2gFc were combined with EndoCC<sup>N180H</sup> and SCT-ox. Concentrations of target proteins, enzymes, and sugar donors as well as reaction durations and conditions are described in supplementary figure legends.

As shown in **Supplementary Fig. 24**, SUMO-2gFc was previously treated with EcNGT + UDP-Glc, EndoA-WT + AzMan<sub>3</sub>-ox, and ApNGT<sup>Q469A</sup> + UDP-Glc. After the glucose installation by ApNGT<sup>Q469A</sup>, SUMO-2gFc was then elaborated with 15 μM purified NmLgtBTrunc and 5 μM purified PdST6mut as well as 2.5 mM UDP-Gal and 2.5 mM CMP-Sia in Buffer 1 supplemented with 10 mM MnCl<sub>2</sub> and 23 mM HEPES buffer (pH=7.5). This reaction was incubated for 16 h at 30 °C.

***In vitro* glycosylation and purification of target proteins from single glycosylation reactions.** IVG reactions were performed using purified 4gIm7 (**Fig. 4**), Im7GeneralistP1-4, and SUMO-4gIm7 (**Supplementary Fig. 15**) targets and purified, conditionally

orthogonal NGTs. 10  $\mu\text{M}$  purified 4glm7 or 2  $\mu\text{M}$  of purified SUMO-4glm7 were incubated with 2.5 mM UDP-Glc and indicated concentrations of each NGT in Buffer 1 for 4 h at 30 °C then purified using Ni-NTA functionalized magnetic beads (Thermo Scientific) based on manufacturer's instructions. After incubation, the 35  $\mu\text{L}$  reactions were diluted with 90  $\mu\text{L}$  cold Buffer 1 and mixed with 20  $\mu\text{L}$  magnetic beads which had been washed with Buffer 1. The beads were incubated at room temperature on a roller for 10 min to capture the 4glm7 protein. The beads were then washed 2 times with 120  $\mu\text{L}$  of cold Buffer 1. The beads were then eluted in 70  $\mu\text{L}$  of Buffer 1 with 500 mM Imidazole by incubation on a room temperature roller for 10 mins. The eluent was then dialyzed against 1:4 diluted Buffer 1 overnight. 35  $\mu\text{L}$  of the dialyzed fraction was incubated with 0.0044  $\mu\text{g}/\mu\text{L}$  of MS Grade Trypsin (Thermo Scientific) at 37 °C overnight and analyzed using the LC-qTOF peptide method described below.

***In vitro* glycosylation and purification of target proteins for sequential glycosylation reactions.** Sequential IVG reactions and purifications of SUMO-4glm7 (**Fig. 5**) were completed similarly to single IVG reactions but used Ni-NTA functionalized magnetic beads as a solid support for movement among sequential IVG reactions. 2  $\mu\text{M}$  purified SUMO-4glm7 was incubated with 2.5 mM UDP-Glc in Buffer 1 with 0.3  $\mu\text{M}$  HiNGT for 4 h at 30 °C on a roller. After the HiNGT reaction, 10 mM imidazole was added to the sample and the sample was incubated with 42  $\mu\text{L}$  of beads per 100  $\mu\text{L}$  of reaction volume. After the reaction, the sample was washed two times with at least one reaction volume of Buffer 1 with 10 mM imidazole. After washing, the beads with immobilized SUMO-4glm7 were resuspended in Buffer 1 with 10 mM imidazole, 2.5 mM UDP-Glc, and 0.3  $\mu\text{M}$  EcNGT and incubated for 4 h at 30 °C. After the reaction, the beads were washed two times with at least one reaction volume of Buffer 1 with 10 mM imidazole. The reaction and washing procedures were then repeated with 0.4  $\mu\text{M}$  ApNGT and 2  $\mu\text{M}$  ApNGT<sup>Q469A</sup>. After each enzymatic reaction, the progression of the reaction was monitored by eluting the SUMO-4glm7 from at least 40  $\mu\text{L}$  of beads following the wash steps using two times the volume of beads of Buffer 1 with 500 mM imidazole. This material was then dialyzed against 1:4 diluted Buffer 1. Diglycosylated products from 2glm7 and 2gFc studies (**Supplementary Figs. 17 and 21**) were similarly purified using Ni-NTA beads before analysis.

Monoglucosylated or diglycosylated substrates (2glm7 or 2gFc) required for analyses and chemoenzymatic elaboration studies (**Supplementary Figs. 17-25**) were generated by incubation with NGTs using reaction conditions specified in figure legends and then purified using Qiagen Ni-NTA agarose resin in order to terminate glycosylation reactions. Briefly, a gravity flow column of Ni-NTA was conditioned with Buffer 1 with 10 mM imidazole. Reaction products were bound to the column by incubation for 30 min, washed with 10 CV Buffer 1 with 20 mM imidazole, and then eluted using Buffer 1 with 500 mM

imidazole and dialyzed against 1:4 diluted Buffer 1. Protein concentrations were quantified using a Bradford assay with a BSA standard curve (Bio-rad).

Purified materials described above and material from subsequent transglycosylation studies (**Supplementary Figs. 18-20** and **22-25**) were prepared for intact protein analysis by neutralizing to pH=7.5 if necessary using NaOH and then supplementing with 0.0047  $\mu\text{g}/\mu\text{L}$  Ulp1 endopeptidase (purified as previously described<sup>16</sup>) and incubating in 1 mM DTT for 1 h at 30 °C or overnight at 4 °C to cleave SUMO from target proteins. Glycosylation site-occupancy was quantified by incubation with trypsin and peptide analysis by LC-qTOF (described below). Intact protein mass analysis was completed by injecting eluent which was not digested by trypsin into LC-qTOF using the intact protein method described below.

**LC-qTOF analysis of target protein glycosylation.** Analysis of glycosylation site-occupancy was completed by injection of trypsinized 4glm7, Im7GeneralistP1-4, or SUMO-4glm7 onto a Bruker Elute UPLC system equipped with an ACQUITY UPLC Peptide BEH C18 Column, 300Å, 1.7  $\mu\text{m}$ , 2.1 mm X 100 mm (186003686 Waters Corporation) with a 10 mm guard column of identical packing (186004629 Waters Corporation) coupled to an Impact-II UHR TOF Mass Spectrometer (Bruker Daltonics, Inc.). The chromatographic separation was completed using Solvent A of 100% H<sub>2</sub>O with 0.1% Formic Acid and Solvent B of 100% acetonitrile (ACN) with 0.1% Formic Acid at a flow rate of 0.5 mL/min and a column temperature of 40 °C. Solvent conditions were held at 0% B for 1 min; then, the peptides of interest were eluted during a 4 min gradient from 0% to 50% B. The column was then washed and re-equilibrated using a 0.1 min gradient from 50–100% B, a 2 min hold at 100% B, a 0.1 min gradient from 100-0% B, and a 1.8 min hold at 0% B for a total run time of 9 min. LC-MS/MS of glycopeptides was performed to confirm the products of transglycosylation and enzymatic monosaccharide addition reactions (**Supplementary Figs. 18-20** and **22-25**). Theoretical glycopeptide masses were targeted for pseudo multiple reaction monitoring (MRM) MS/MS fragmentation according to detected intact protein MS peaks. A collisional energy of 30 eV and a window of  $\pm 2$  m/z from targeted m/z values was used for glycopeptide fragmentation. The scan range for MS and MS/MS of peptides was 100-3000 m/z. External calibration was performed for all datapoints.

Unless otherwise noted, analyses of intact protein masses were completed by injection of Ulp1 digested protein onto a Bruker Elute UPLC system equipped with an ACQUITY UPLC Protein BEH C4 Column, 300Å, 1.7  $\mu\text{m}$ , 2.1 mm X 50 mm (186004495 Waters Corporation) with a 10 mm guard column of identical packing (186004623, Waters Corporation) coupled to an Impact-II UHR TOF-MS Mass Spectrometer (Bruker Daltonics, Inc.). The chromatographic separation was completed using Solvent A of 100% H<sub>2</sub>O with 0.1% Formic Acid and Solvent B of 100% acetonitrile (ACN) with 0.1% Formic Acid at a flow rate of 0.5 mL/min and a column temperature of 50 °C. Solvent conditions

were held at 0% B for 1 min; then, the protein of interest was eluted during a 4 min gradient from 20% to 50% B. The column was then washed and re-equilibrated using a 0.5 min wash at 71.4% B, a 0.1 min gradient from 71.4-100% B, a 2 min wash at 100% B, a 0.1 min gradient from 100-20% B, and a 2.2 min hold at 20% B for a total run time of 10 min. The MS scan range was 100-3000 m/z with a spectral rate of 2 Hz. External calibration was performed for all datapoints.

Intact protein LC-MS analysis of the final products of **Supplementary Figs. 18-20** was performed by diluting sample in 0.1% formic acid before injection into a QExactivePlus Orbitrap mass spectrometer in conjunction with Ultimate 3000 HPLC system (ThermoFisher) equipped with an Xbridge™ BEH300 C4 column (300 Å, 3.5 μm, 2.1 x 50 mm, Waters). Chromatography was performed at a column temperature of 23 °C and a flow rate of 0.4 ml/min using 100% water containing 0.1% Formic Acid as Solvent A and 100% acetonitrile containing 0.1% Formic Acid as Solvent B. The column was equilibrated at 5% B for 2 min, followed by protein injection and separation over a linear gradient of 5 - 95% B for 6 min. The column was washed with 95% B for 2 min and equilibrated with 5% B for 2 min. The MS scan range was 400 to 3000 m/z at a scan speed of 0.9 Hz and 140,000 resolution. The m/z profiles were deconvoluted using MagTran (Amgen).

**Analysis of LC-qTOF generated target protein glycosylation data.** Data from Impact-II UHR TOF Mass Spectrometer was processed using Bruker Compass Data Analysis software version 4.1. Glycosylation site occupancies, defined as  $Glc_1/(Glc_0+Glc_1)$  were quantified by integrating the areas of extracted ion chromatograms (EICs) of theoretical values for monoisotopic protonated +2 charge states of glycosylated and aglycosylated peptides with adjustment for ionization efficiency by RIFs as previously described<sup>6</sup>. Quantification of glycoprotein modification for **Supplementary Fig. 12** was completed by integrating extracted ion chromatograms of the three highest intensity charge states of the glycosylated and aglycosylated intact protein. Deconvolution of intact protein data was performed using maximum entropy deconvolution using MS peaks within m/z range of 700–2,000 into a mass range of 14,000–18,000 Da. Raw data was then plotted and annotated using R Studio. Deconvolutions used full mass spectra averaged across the entire peak width of the proteins of interest (encompassing the full elution of the glycosylated and aglycosylated glycoforms). Theoretical intact protein masses are shown in **Supplementary Table 3**.

**Quantification for correct sequential glycosylation of target protein.** The purity of correct sequential glycosylation was calculated based on site-occupancy data of each GlycTag after each NGT treatment (shown in **Fig. 5c**) with the assumption that

glycosylation events at the four sites within 4glm7 are not interdependent (supported by **Supplementary Fig. 14**). The following equation was used to calculate the overall yield:

$$\%modification\ of\ GlycTag1\ (NGT1) *$$

$$(\%modification\ of\ GlycTag2\ (NGT2) - \%modification\ of\ GlycTag2\ (NGT1)) *$$

$$(\%modification\ of\ GlycTag3\ (NGT3) - \%modification\ of\ GlycTag3\ (NGT2)) *$$

$$(\%modification\ of\ GlycTag4\ (NGT4) - \%modification\ of\ GlycTag4\ (NGT3))$$

Where %modification of GlycTag<sub>x</sub> (NGT<sub>y</sub>) is the observed site occupancy of GlycTag<sub>x</sub> after treatment with NGT<sub>y</sub>; x, y refers to 1, 2, 3, 4, which represent HiNGT, EcNGT, ApNGT and ApNGT<sup>Q469A</sup> in this study.

**Data availability.** All data generated or analyzed during this study are included in this published article (and its supplementary files) or are available from the corresponding authors on reasonable request.

**Safety Statement.** No unexpected or unusually high safety hazards were encountered.

## Supplementary Tables

**Supplementary Table 1: Strains and plasmids used in this study.** For additional descriptions of plasmids used for NGT screening see **Supplementary Table 2** and **Supplementary Note 1**. Sources [1], [2], [3], and [4] are Martin et al. *Nature Communications* 2018<sup>9</sup>, Kightlinger\* and Lin\* et al. *Nature Chemical Biology* 2018<sup>6</sup>, Eshima et al. *PLoS One*, 2015<sup>17</sup>, and Takegawa et al. *Arch Biochem Biophys* 1997<sup>18</sup>, respectively.

| Plasmid and Strain     | Relevant Characteristics                                                                                                                                             | Source                   |
|------------------------|----------------------------------------------------------------------------------------------------------------------------------------------------------------------|--------------------------|
| <b>Strains</b>         |                                                                                                                                                                      |                          |
| BL21 Star (DE3)        | <i>F-ompT hsdSB (rB-, mB-) galcdmrne131 (DE3)</i>                                                                                                                    | Thermo Fisher Scientific |
| C321.ΔA.759            | MG1655 C321 Derivative                                                                                                                                               | [1]                      |
| <b>Plasmids</b>        |                                                                                                                                                                      |                          |
| pJL1.HiNGT             | <i>H. influenzae</i> , HiNGT, (ADO96126.1), C-term strep-tag                                                                                                         | This study               |
| pJL1.EcNGT             | <i>E. coli</i> , EcNGT, (CBL93373.1), C-term strep-tag                                                                                                               | This study               |
| pJL1.ApNGT             | <i>A. pleuroneumoniae</i> , ApNGT, (ABN74719.1)                                                                                                                      | [2]                      |
| pJL1.ApNGT(Q469A)      | pJL1.ApNGT(Q469A), Q469A                                                                                                                                             | This study               |
| pJL1.Im7-0s            | <i>E. coli</i> Im7, (IMM7_ECOLX), C-term 6xHis-tag                                                                                                                   | [2]                      |
| pETBCS.NS              | pETBCS modified with Nde1 and Sal1 restriction sites, P <sub>T7</sub> , KAN <sup>R</sup> , IPTG Induction                                                            | [2]                      |
| pETBCS.NS.GeneralistP1 | Im7-0s, M1_E2insRATTIYANVTLAGGR                                                                                                                                      | This study               |
| pETBCS.NS.GeneralistP2 | Im7-0s, N26_D32delinsRATTWYANVTRAGG                                                                                                                                  | This study               |
| pETBCS.NS.GeneralistP3 | Im7-0s, S58_S64delins RATTYMGNISRAGG                                                                                                                                 | This study               |
| pETBCS.NS.GeneralistP4 | Im7-0s, G87_G88insRATTYMGNISRAGG                                                                                                                                     | This study               |
| pETBCS.NS.4glm7        | Im7-0s, M1_E2insRATTLNENVTRAGG, N26_D32delinsRATTWYANVTRAGG, S58_S64delins RATTYMGNISRAGG, G87_G88insRATTYMGNISRAGG                                                  | This study               |
| pETBCS.NS.SUMO-2glm7   | N-term 6xHis-tag, SUMO, GS linker, Im7-0s, M1_E2insRATTWDYNLTRAGG, G87_G88insRATTYMGNISRAGG                                                                          | This study               |
| pETBCS.NS.SUMO-2gFc    | N-term 6xHis-tag, SUMO, GS linker, H. sapiens Fc, (IGHG1_HUMAN), Q178_Y183delinsRATTWDYNLTRAGG, C-term RATTYMGNISRAGG                                                | This study               |
| pET28a                 | P <sub>T7</sub> , KAN <sup>R</sup> , IPTG Induction                                                                                                                  | Novagen                  |
| pET28a.SUMO-4glm7      | pET28a, N-term 6xHis-tag, SUMO, GS linker, 4glm7                                                                                                                     | This study               |
| pETBCS.NS.HiNGT        | <i>H. influenzae</i> , HiNGT, (ADO96126.1), C-term Twin strep-tag                                                                                                    | This study               |
| pETBCS.NS.EcNGT        | <i>E. coli</i> , EcNGT, (CBL93373.1), C-term Twin strep-tag                                                                                                          | This study               |
| pETBCS.NS.ApNGT        | <i>A. pleuroneumoniae</i> , ApNGT, (ABN74719.1), C-term Twin Strep-tag                                                                                               | This study               |
| pETBCS.NS.ApNGT(Q469A) | pETBCS.NS.ApNGT, Q469A, C-term Single Strep-tag                                                                                                                      | This study               |
| pETBCS.NS.LgtBTrunc    | N-term Twin Strep-tag, <i>N. meningitidis</i> NmLgtB, LGTB_NEIMB E258_Q275delinsGDD                                                                                  | This study               |
| pETBCS.NS.PdST6Mut     | N-term His tag + thrombin cleavage site, <i>Photobacterium damsela</i> , O66375_9GAMM, A200Y, S232Y, ΔM1_A15 and Δ498_D675                                           | This study               |
| pET41b.EndoCC1(N180H)  | P <sub>T7</sub> , KAN <sup>R</sup> , IPTG Induction, N-term 6xHis tag, <i>Coprinopsis cinerea</i> , Endo-β-N-acetylglucosaminidase 1, Uniprot A8P7P2_COPC7           | [3]                      |
| pGEX-2T/Endo-A(WT)     | P <sub>tac</sub> , AMP <sup>R</sup> , IPTG Induction N-term GST tag, <i>Arthrobacter protophormiae</i> , Endo-β-N-acetylglucosaminidase, Uniprot Q9ZB22_9MICC, Δ1-24 | [4]                      |



**Supplementary Table 2: Putative NGT sequences screened by GlycoSCORES.** Full species names and NCBI identifiers for all enzymes screened for *N*-glucosyltransferase activity in **Fig. 2**. Each sequence was identified from family 41 of the CAZY database, synthesized in the pJL1 plasmid backbone as shown in **Supplementary Note 1**, expressed in CFPS, and screened for activity using SAMDI-MS.

| Abbreviation | Organism                                                                     | Accession Number |
|--------------|------------------------------------------------------------------------------|------------------|
| Ab           | <i>Azospirillum brasilense</i>                                               | AIB12151.1       |
| Ap           | <i>Actinobacillus pleuropneumoniae</i> serovar 5b str. L20                   | ABN74719.1       |
| Av           | <i>Anabaena variabilis</i> PCC 7937                                          | ABA19974.1       |
| Bc1          | <i>Burkholderia cepacia</i>                                                  | AIO47218.1       |
| Bc2          | <i>Burkholderia cepacia</i>                                                  | AKE02193.1       |
| Bd           | <i>Bradyrhizobium diazoefficiens</i>                                         | BAR53565.1       |
| Bm           | <i>Burkholderia mallei</i>                                                   | AIO50869.1       |
| Bs           | <i>Burkholderia</i> sp. CCGE1001                                             | ADX55793.1       |
| Cc1          | <i>Caulobacter crescentus</i> NA1000                                         | ACL93585.1       |
| Cc2          | <i>Caulobacter crescentus</i> NA1000                                         | ACL94629.1       |
| Cc3          | <i>Caulobacter crescentus</i> NA1000                                         | ACL97299.1       |
| Ec           | <i>Escherichia coli</i>                                                      | CBL93373.1       |
| Gs1          | <i>Geobacter sulfurreducens</i>                                              | AJY68899.1       |
| Gs2          | <i>Geminocystis</i> sp. NIES-3709                                            | BAQ65624.1       |
| Hd           | <i>Haemophilus ducreyi</i>                                                   | AAP96624.1       |
| Hh           | <i>Herbaspirillum hiltneri</i> N3                                            | AKZ61275.1       |
| Hi           | <i>Haemophilus influenzae</i>                                                | ADO96126.1       |
| Ls           | <i>Leptolyngbya</i> sp. PCC 7376                                             | AFY39462.1       |
| Ma1          | <i>Microcystis aeruginosa</i> NIES-843                                       | BAG01392.1       |
| Ma2          | <i>Microcystis aeruginosa</i> NIES-843                                       | BAG05492.1       |
| Ma3          | <i>Microcystis aeruginosa</i> NIES-843                                       | BAG05864.1       |
| Me           | <i>Methylobacterium extorquens</i> CM4                                       | ACK83875.1       |
| Mh           | <i>Mannheimia haemolytica</i>                                                | AJE07135.1       |
| Np           | <i>Nostoc piscinale</i> CENA21                                               | ALF56607.1       |
| Pc           | <i>Paraburkholderia caribensis</i> MBA4                                      | ALL64447.1       |
| Pf2          | <i>Paraburkholderia fungorum</i>                                             | AJZ57761.1       |
| Pf3          | <i>Paraburkholderia fungorum</i>                                             | AJZ59790.1       |
| Pm           | <i>Prochlorococcus marinus</i> str. NATL2A                                   | AAZ58722.1       |
| Pp           | <i>Pseudomonas putida</i>                                                    | ANC05098.1       |
| Pphe         | <i>Paraburkholderia phenoliruptrix</i> BR3459a                               | AFT87114.1       |
| Pphy         | <i>Paraburkholderia phytofirmans</i> PsJN                                    | ACD18780.1       |
| Ps           | <i>Piscirickettsia salmonis</i> LF-89                                        | AKP73554.1       |
| Pz           | <i>Phenylobacterium zucineum</i> HLK1                                        | ACG76885.1       |
| Rl           | <i>Rhizobium leguminosarum</i> bv. trifolii WSM1689                          | AHF82454.1       |
| Rp           | <i>Ralstonia pickettii</i> DTP0602                                           | AGW94945.1       |
| Rso          | <i>Ralstonia solanacearum</i>                                                | ALF89676.1       |
| Rsp2         | <i>Rhodobacter sphaeroides</i> 2.4.1                                         | ABA81711.1       |
| Se           | <i>Salmonella enterica</i> subsp. <i>enterica</i> serovar <i>Weltevreden</i> | CUR95075.1       |
| Ss           | <i>Synechocystis</i> sp. PCC 6803                                            | BAM51499.1       |
| Tt           | <i>Thermobaculum terrenum</i> ATCC BAA-798                                   | ACZ43705.1       |
| Yp           | <i>Yersinia pestis</i>                                                       | CAL21840.1       |

**Supplementary Table 3: Theoretical masses of intact proteins.** Theoretical intact protein masses of Ulp1-cleaved proteins were calculated using EXPASY Protein Parameters online tool. Observed mass values are shown in deconvoluted LC-qTOF spectra figures.

| Protein | Glycan Modification                                         | Theoretical (Da) |
|---------|-------------------------------------------------------------|------------------|
| 4glm7   | None                                                        | 15631            |
| 4glm7   | Glc <sub>1</sub>                                            | 15793            |
| 4glm7   | Glc <sub>2</sub>                                            | 15955            |
| 4glm7   | Glc <sub>3</sub>                                            | 16117            |
| 4glm7   | Glc <sub>4</sub>                                            | 16279            |
| 2glm7   | None                                                        | 14160            |
| 2glm7   | Glc <sub>1</sub>                                            | 14322            |
| 2glm7   | Glc <sub>2</sub>                                            | 14484            |
| 2glm7   | AzMan(AzMan)ManGlcNAcGlc                                    | 15062            |
| 2glm7   | AzMan(AzMan)ManGlcNAcGlc+Glc                                | 15224            |
| 2glm7   | (AzMan(AzMan)ManGlcNAcGlc) <sub>2</sub>                     | 15963            |
| 2glm7   | SiaGalGlcNAcMan(SiaGalGlcNAcMan)ManGlcNAcGlc                | 16324            |
| 2glm7   | (SiaGalGlcNAcMan(SiaGalGlcNAcMan)ManGlcNAcGlc) <sub>2</sub> | 18488            |
| 2gFc    | None                                                        | 28611            |
| 2gFc    | Glc <sub>1</sub>                                            | 28773            |
| 2gFc    | Glc <sub>2</sub>                                            | 28935            |
| 2gFc    | AzMan(AzMan)ManGlcNAcGlc                                    | 29513            |
| 2gFc    | AzMan(AzMan)ManGlcNAcGlc+Glc                                | 29675            |
| 2gFc    | SiaGalGlcNAcMan(SiaGalGlcNAcMan)ManGlcNAcGlc                | 30775            |
| 2gFc    | SiaGalGlcNAcMan(SiaGalGlcNAcMan)ManGlcNAcGlc+Glc            | 30937            |
| 2gFc    | (SiaGalGlcNAcMan(SiaGalGlcNAcMan)ManGlcNAcGlc) <sub>2</sub> | 32939            |

**Supplementary Table 4: Relative ionization factors (RIFs) used in this study for SAMDI-MS.**

For each peptide library, approximately 16-20 representative peptides were used to calculate the Average RIF. For individual peptides, (n=3) triplicate experiments were performed for the RIF. Mean and S.D. of RIF measurements are shown.

| Peptide / peptide library                                                | Relative Ionization Factor |
|--------------------------------------------------------------------------|----------------------------|
| X <sub>-1</sub> NX <sub>+1</sub> (T/S)RC                                 | 0.540 ± 0.076              |
| X <sub>-2</sub> (X <sub>-1</sub> NX <sub>+1</sub> T/S)RC                 | 0.570 ± 0.140              |
| X <sub>-3</sub> (X <sub>-2</sub> X <sub>-1</sub> NX <sub>+1</sub> T/S)RC | 0.555 ± 0.080              |
| WYANVTRC                                                                 | 0.946 ± 0.036              |
| YMGNISRC                                                                 | 0.789 ± 0.017              |
| LNENVTRC                                                                 | 0.739 ± 0.022              |
| WDYNLTRC                                                                 | 0.699 ± 0.027              |

**Supplementary Table 5: Relative Ionization Factors for peptides measured by LC-qTOF.**

RIFs were determined for glycopeptides identical to those observed following trypsinization of 4glm7 and SUMO-4glm7. Peptides were synthesized by SPPS, purified by HPLC and quantified by dry weight. Glycosylated peptide samples at 12.5  $\mu$ M concentration were treated with 2  $\mu$ M ApNGT(Q469A), 1  $\mu$ M EcNGT, and 10 mM UDP-Glc overnight and then quenched at 80 °C for 20 min. After incubation and quenching, these peptides were found to be completely glycosylated and no aglycosylated peptides could be detected. This glycosylated sample was then mixed at equimolar concentration with aglycosylated samples prepared similarly without NGTs. This mixture was injected into LC-qTOF using the peptide analysis method described in the **Methods**. Mean and S.D. of RIFs were calculated from observed EIC areas from n=3 independent peptide IVGs, mixings, and LC-qTOF injections.

| <b>Peptide</b>    | <b>Targeting NGT</b> | <b>RIF</b>                          |
|-------------------|----------------------|-------------------------------------|
| <b>ATTWYANVTR</b> | <b>HiNGT</b>         | <b>0.937 <math>\pm</math> 0.017</b> |
| <b>ATTYMGNISR</b> | <b>EcNGT</b>         | <b>0.923 <math>\pm</math> 0.010</b> |
| <b>ATTLNENVTR</b> | <b>ApNGT</b>         | <b>0.871 <math>\pm</math> 0.002</b> |
| <b>ATTWDYNLTR</b> | <b>ApNGT(Q469A)</b>  | <b>0.870 <math>\pm</math> 0.014</b> |

**Supplementary Table 6: Calculation of SUMO-4glm7 yields with site-specific control at various numbers of glycosylation sites.** Calculations based on site-occupancy data of SUMO-4glm7 after treatment with each NGT treatment shown in **Fig. 5** and assume that glycosylation events are not interdependent (supported by **Supplementary Fig. 13**). Yield calculations with fewer than 4 glycosylation sites assume the presence of only the indicated number of GlycTags and the use of their corresponding NGTs for sequential glycosylation. Yield of condition with no selective GlycTags assumes sequential elaboration steps with equal amounts of glycosylation at all sites at each step using perfect control of reaction time. Fold enrichment compares given scenarios with this no selectivity condition.

| Sequential NGT modification with their specific GlycTags | Number of glycosylation sites | Correct glycoprotein yield | Fold enrichment     |
|----------------------------------------------------------|-------------------------------|----------------------------|---------------------|
| No selective NGTs and GlycTags                           | 4                             | 0.39%                      | ---                 |
| HiNGT, EcNGT, ApNGT, ApNGT <sup>Q469A</sup>              | 4                             | 62% ± 1%                   | 1.6x10 <sup>2</sup> |
| No selective NGTs and GlycTags                           | 3                             | 3.7%                       | ---                 |
| HiNGT, EcNGT, ApNGT                                      | 3                             | 68% ± 1%                   | 18                  |
| HiNGT, EcNGT, ApNGT <sup>Q469A</sup>                     | 3                             | 88% ± 2%                   | 24                  |
| HiNGT, ApNGT, ApNGT <sup>Q469A</sup>                     | 3                             | 75% ± 1%                   | 20                  |
| EcNGT, ApNGT, ApNGT <sup>Q469A</sup>                     | 3                             | 80% ± 1%                   | 22                  |
| No selective NGTs and GlycTags                           | 2                             | 25%                        | ---                 |
| HiNGT, EcNGT                                             | 2                             | 88% ± 1%                   | 3.5                 |
| HiNGT, ApNGT                                             | 2                             | 82% ± 1%                   | 3.3                 |
| HiNGT, ApNGT <sup>Q469A</sup>                            | 2                             | 95% ± 1%                   | 3.8                 |
| EcNGT, ApNGT                                             | 2                             | 87% ± 1%                   | 3.5                 |
| EcNGT, ApNGT <sup>Q469A</sup>                            | 2                             | 100% ± 2%                  | 4.0                 |
| ApNGT, ApNGT <sup>Q469A</sup>                            | 2                             | 90% ± 1%                   | 3.6                 |

## Supplementary Figures

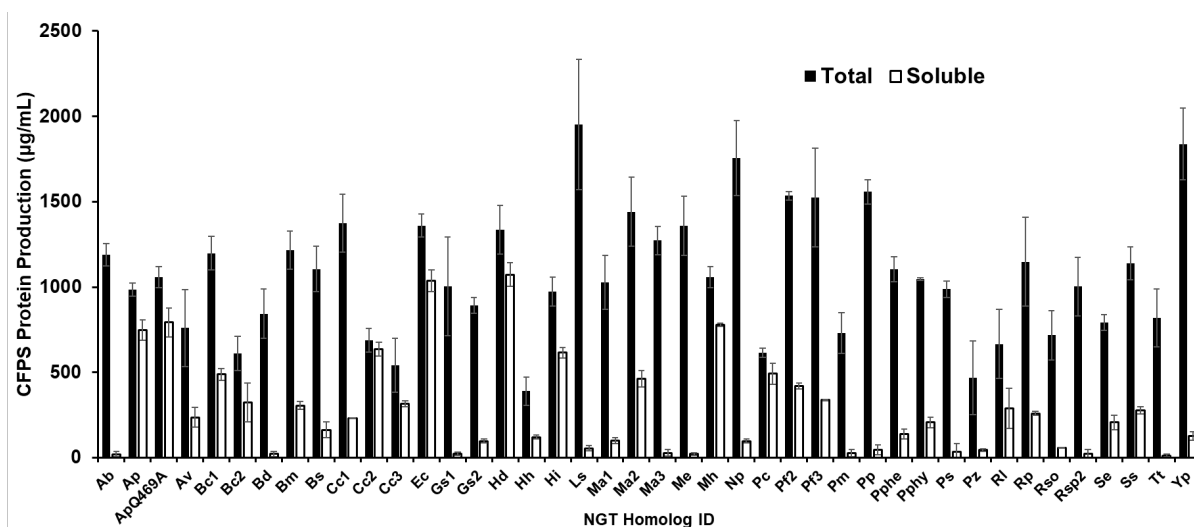

**Supplementary Figure 1: CFPS expression yields of putative NGTs.** Total and soluble CFPS yields of 41 NGT homologs and the ApNGT<sup>Q469A</sup> variant were quantified by <sup>14</sup>C-leucine incorporation. All CFPS reactions were incubated for 20 h at 20 °C (see **Methods** for details). Average and S.D. of at least n=2 CFPS reactions are shown.

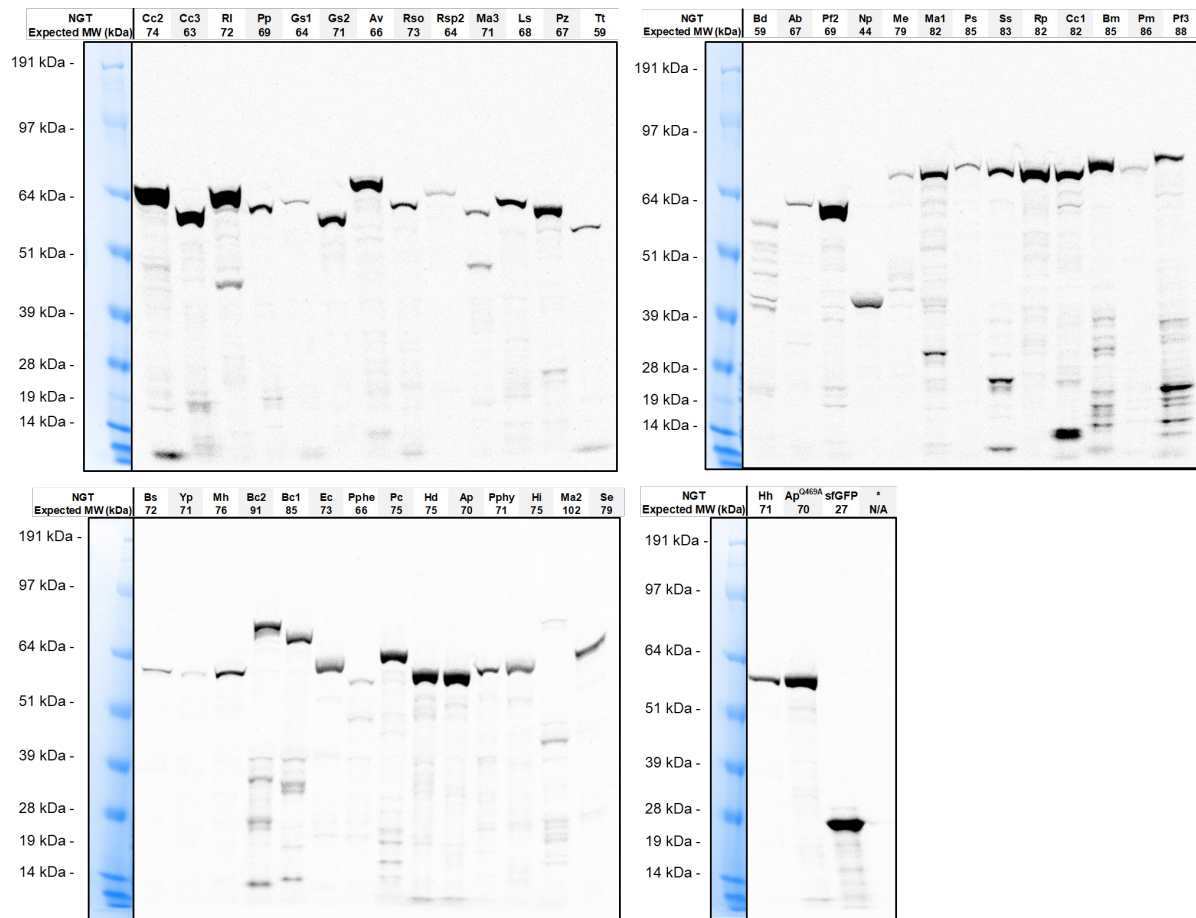

**Supplementary Figure 2: Autoradiograms of putative NGTs expressed in CFPS.** Soluble fractions of CFPS reactions, supernatant after centrifuged with 12,000xg for 15 min at 4 °C, containing <sup>14</sup>C-leucine were separated using a 4-12% SDS-PAGE Bis-tris gel in MOPS buffer and imaged using a 48 h phosphoscreen exposure (n=1). The same gel was Coomassie stained and aligned with autoradiogram image for molecular weight standard reference. Autoradiograms indicate the production of primarily full-length products near to expected molecular weights.

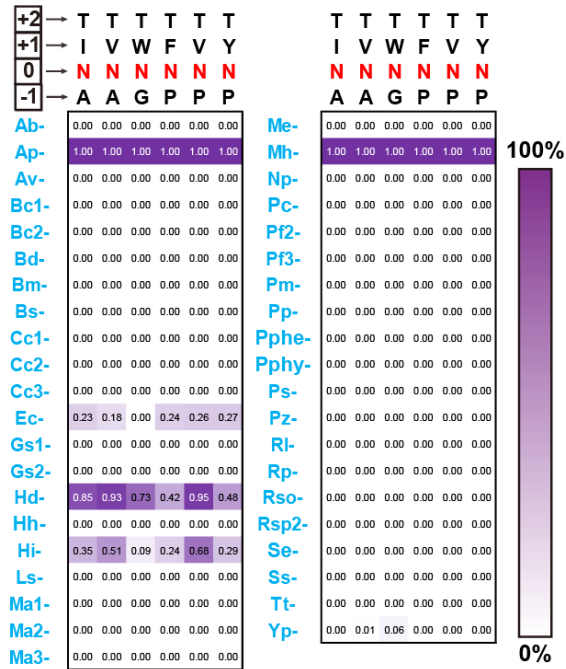

**Supplementary Figure 3: Activity of 41 putative NGTs analyzed with six representative NGT substrate peptides.** Five NGTs showed good activity on most peptides, and YpNGT only showed low levels of modification on one peptide “GNWT”. Relative intensities of peptide substrates and glycosylated products observed in mass spectra  $Glc_1/(Glc_1+Glc_0)$  are shown when treated with 5% (v/v) CFPS NGTs and 2.5 mM UDP-Glc at 30 °C for 21 h (n=1).





**Supplementary Figure 4: NGTs show differences in peptide selectivity across X.<sub>1</sub>NX<sub>+1</sub>(T/S)RC peptide library.** Percent glucose modification of peptides when treated with the four indicated NGTs. Conditions from n=1 experiment shown in **Fig. 2**.

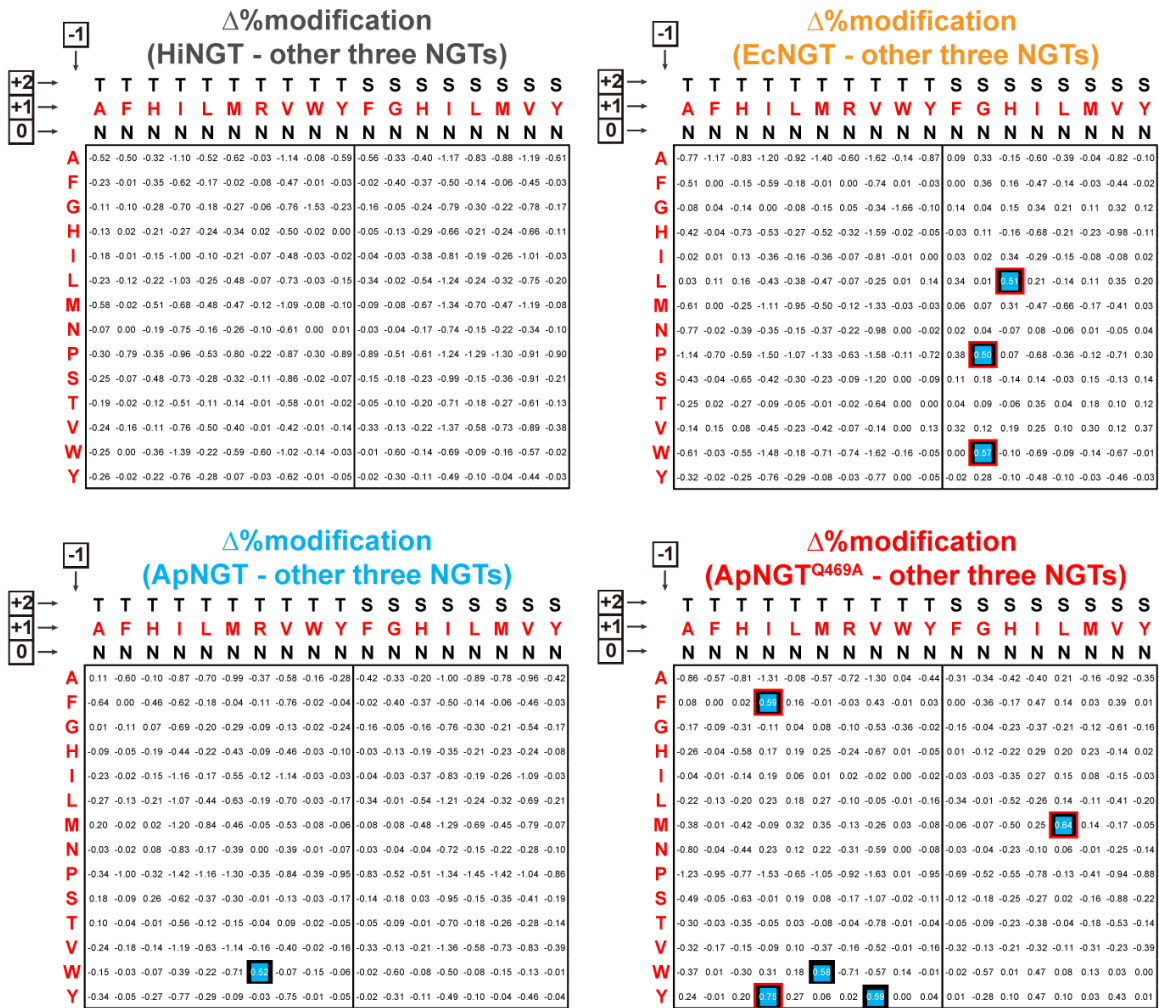

**Supplementary Figure 5: Peptide sequences which were uniquely preferred by each NGT and could provide orthogonality to other NGTs.** Differences in percent glucose modification (each NGT - other three NGTs) using the data in **Supplementary Fig. 4** showed the potential orthogonality of each NGT. For clarity, rows and columns in which all peptides and NGT combinations less than 50% modification are not shown. When the value is higher than 50%, the value is highlighted in “white” and a mini bar graph (blue bar in black background) is presented to show the ratio of %modification (NGT - other three NGTs) to %modification (NGT) 0-1 range. If the ratio is higher than 90%, the peptide is highlighted again with red squares. These peptides are potentially orthogonal to the other three NGTs. Only EcNGT and ApNGT<sup>Q469A</sup> had several potentially orthogonal peptides when compared to the other three NGTs.

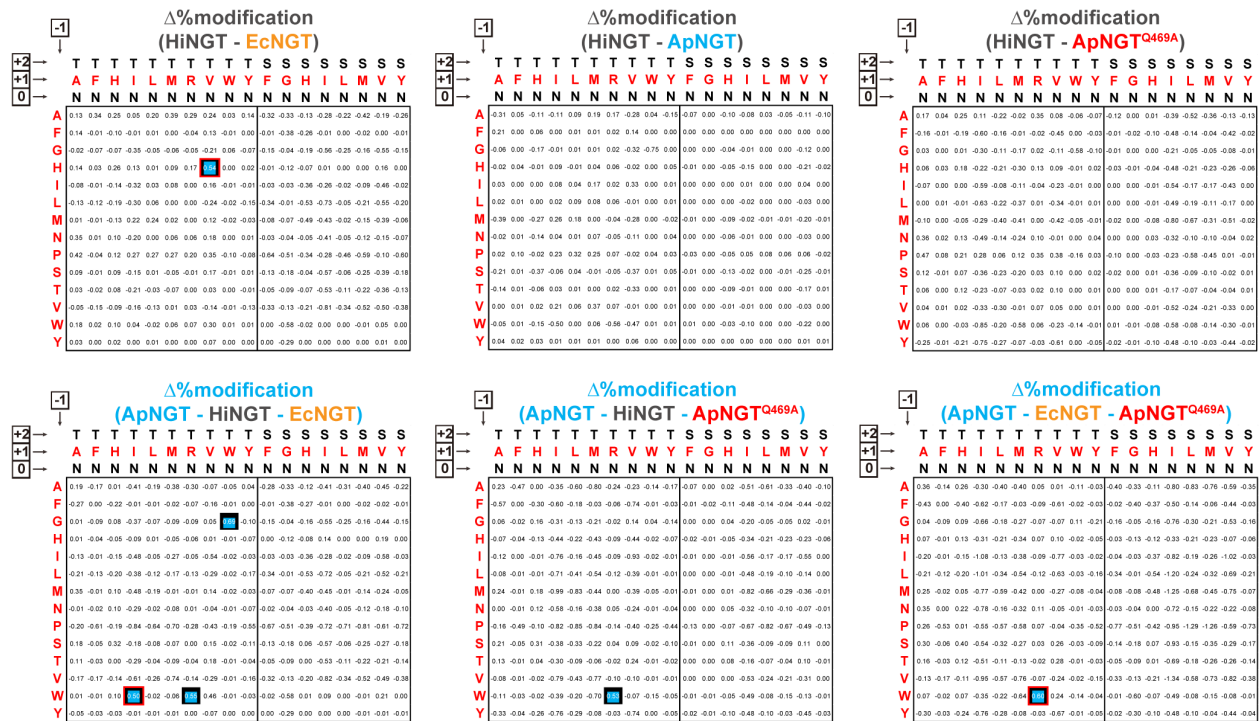

**Supplementary Figure 6: Sequences showing potential orthogonality of HiNGT and ApNGT to other one or two NGTs.** The analysis is similar to **Supplementary Fig. 5**. HiNGT only showed potential orthogonality to EcNGT while ApNGT showed potential orthogonality to HiNGT and EcNGT, or EcNGT and ApNGT<sup>Q469A</sup>.

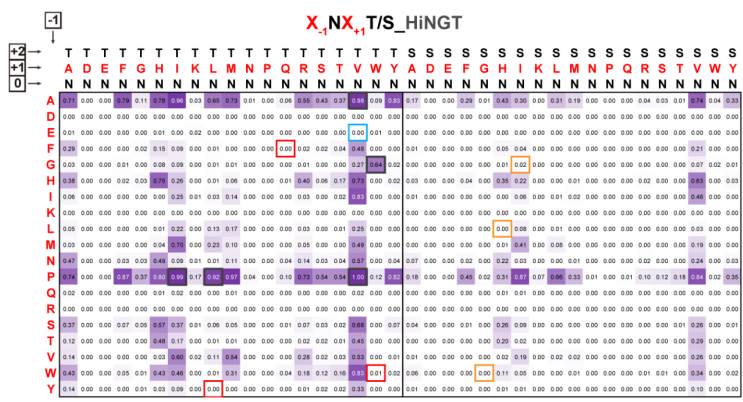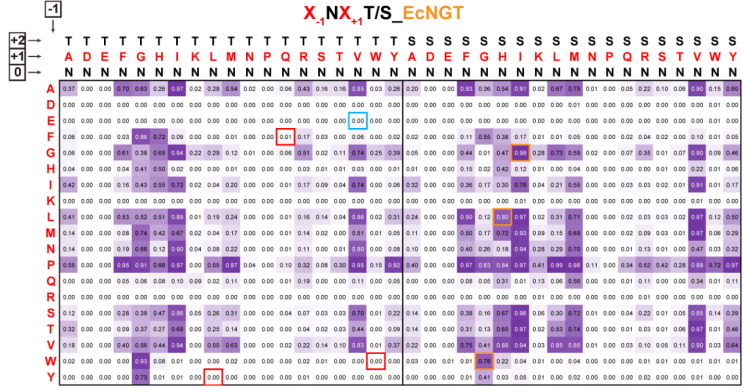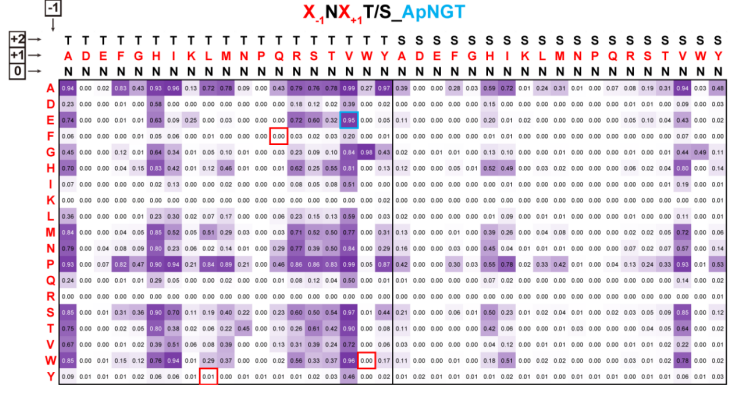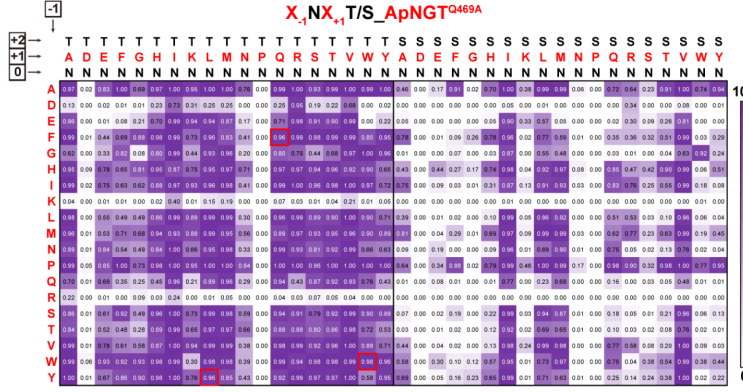

**Supplementary Figure 7: Screening the conditional orthogonality of four NGTs using a  $X_{-1}NX_{+1}(T/S)RC$  peptide library.** The  $X_{-1}NX_{+1}(T/S)RC$  peptide library was screened with HiNGT, EcNGT, ApNGT, and then ApNGT<sup>Q469A</sup>, respectively, to find preferred peptides over preceding NGTs, in which the modification of each NGT is >90% more than the modification by preceding NGTs. Several GlycTags for each NGT were selected for the subsequent screens (colored boxes). Experimental conditions (n=2): 0.4  $\mu$ M purified HiNGT or 0.7  $\mu$ M purified EcNGT, 30 °C for 21h; 0.45  $\mu$ M purified ApNGT or 0.25  $\mu$ M purified ApNGT<sup>Q469A</sup>, 30 °C for 3h.

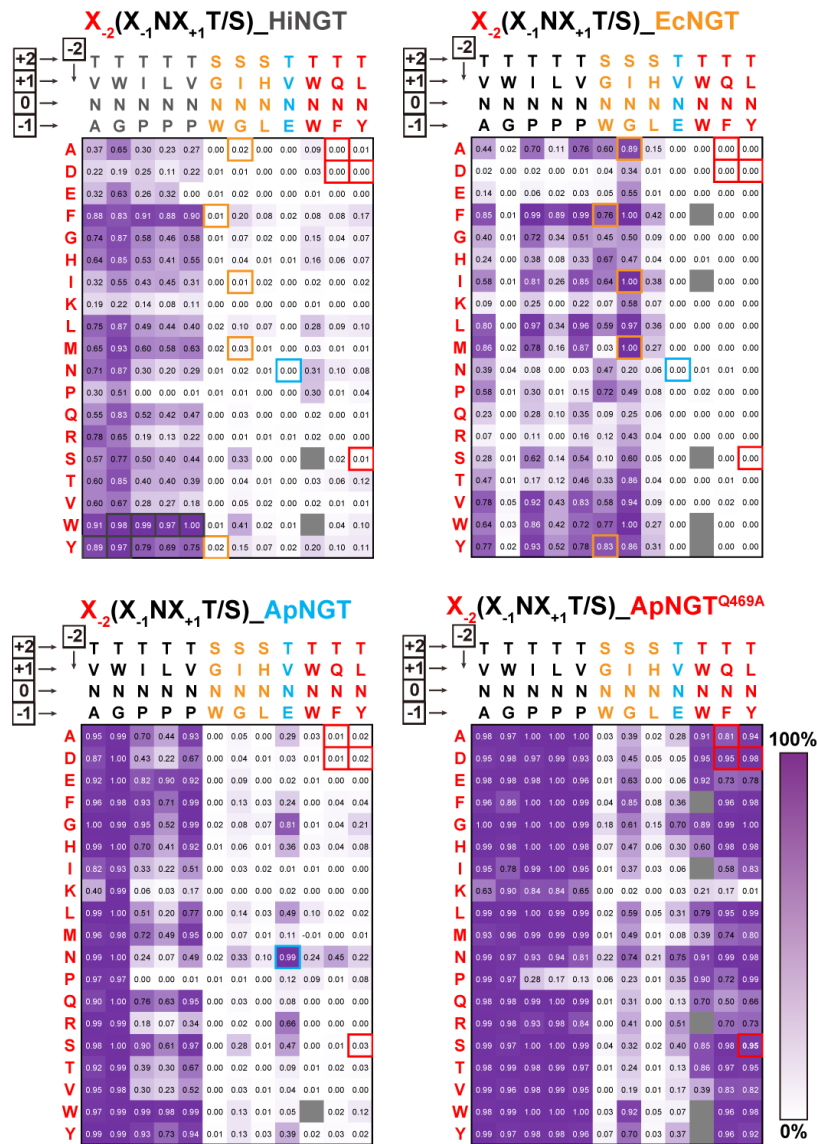

**Supplementary Figure 8: Screening the conditional orthogonality of four NGTs using peptide library X<sub>-2</sub>(X<sub>-1</sub>NX<sub>+1</sub>T/S)RC derived from the selected peptides in the X<sub>-1</sub>NX<sub>+1</sub>T/S screens. The peptide library was screened in the order of HiNGT, EcNGT, ApNGT and then ApNGT<sup>Q469A</sup>, individually, to find peptides preferred over preceding NGTs, in which the modification of each NGT is >90% more than the sum of the modifications by preceding NGTs. Several GlycTags for each NGT were selected for the next screen (colored boxes). Experimental conditions (n=1): 0.4 μM purified HiNGT or 1.2 μM purified EcNGT, 30 °C for 21h; 0.8 μM purified ApNGT or 0.2 μM purified ApNGT<sup>Q469A</sup>, 30 °C for 3h.**



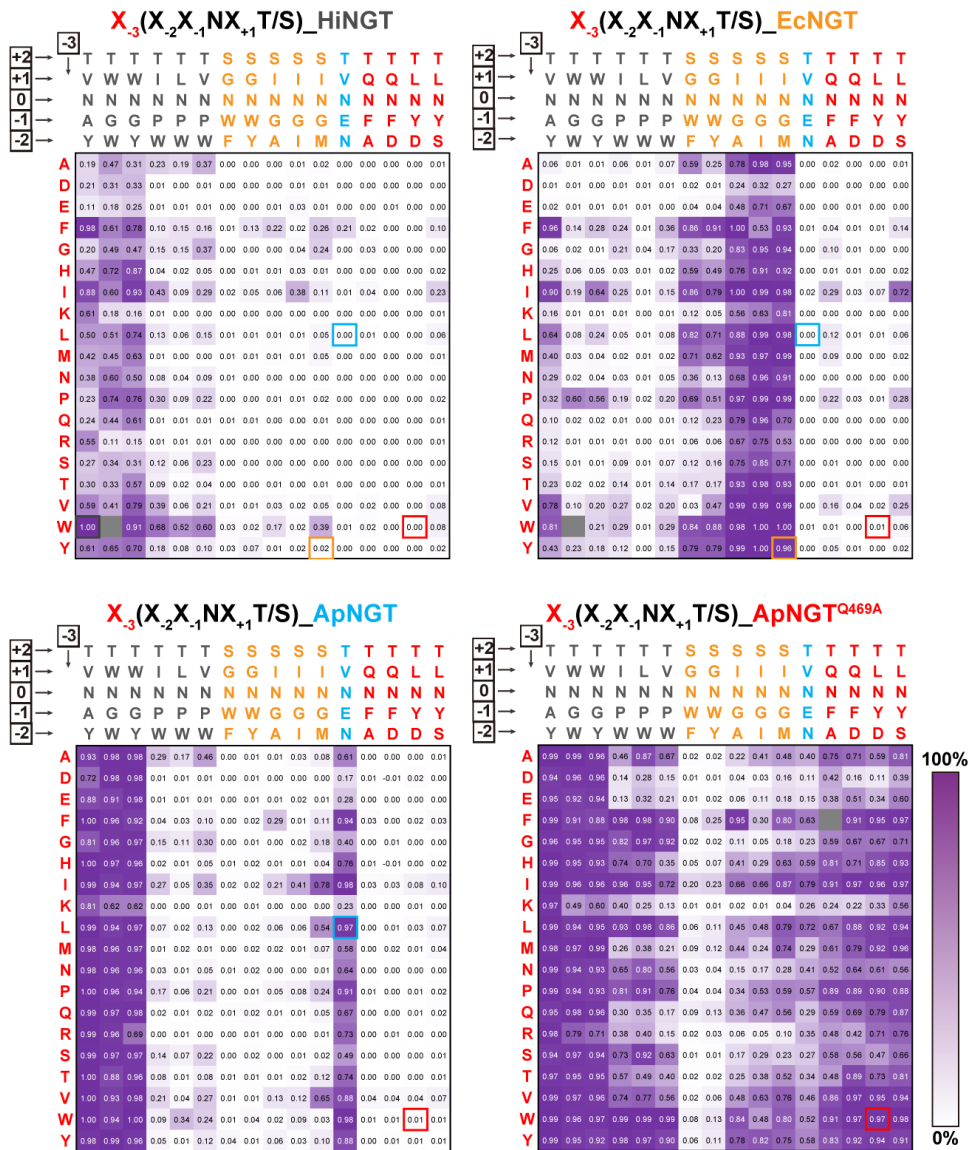

**Supplementary Figure 9: Screening the conditional orthogonality of four NGTs using peptide library X<sub>3</sub>(X<sub>2</sub>X<sub>1</sub>NX<sub>+1</sub>T/S)RC derived from the selected peptides in the X<sub>2</sub>(X<sub>1</sub>NX<sub>+1</sub>T/S)RC screens.** The peptide library was screened in the order of HiNGT, EcNGT, ApNGT and then ApNGT<sup>Q469A</sup>, respectively, to identify preferred peptides over preceding NGTs, in which the modification of a given NGT is >95% more than the sum of the modifications by preceding NGTs. A set of four GlycTags was selected to engineer into proteins for sequential glycosylation. Experimental conditions (n=1): 0.15 μM purified HiNGT or 0.8 μM purified EcNGT, 30 °C for 21h; 0.3 μM purified ApNGT or 0.05 μM purified ApNGT<sup>Q469A</sup>, 30 °C for 3h.



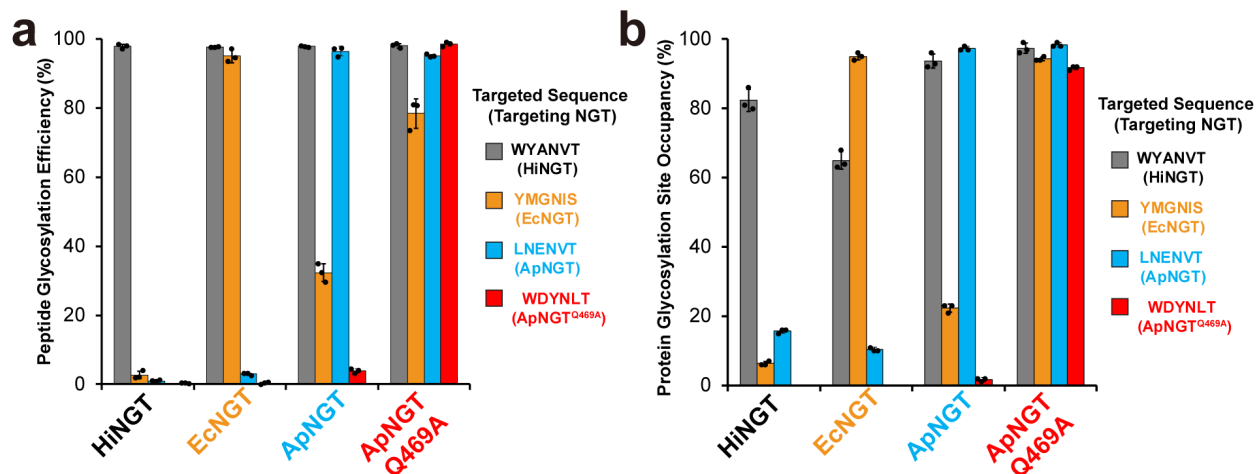

**Supplementary Figure 10: Bar graphs showing conditional orthogonality of optimized GlycTags at the peptide level and differential targeting of protein glycosylation sites. (a)** Bar graph showing conditional orthogonality of optimized 6-mer GlycTag peptides by HiNGT, EcNGT, ApNGT and ApNGT<sup>Q469A</sup> (data shown as heatmap in **Fig. 4a**). Mean and S.D. of peptide glycosylation efficiencies determined by n=3 SAMDI-MS experiments are shown. **(b)** Bar graph showing differential targeting of optimized glycosylation sites within 4glm7 protein under optimized conditions (data shown as heatmap in **Fig. 4c**). Mean and S.D. of n=3 independent protein IVG reactions and quantification of trypsinized peptide glycosylation efficiencies by LC-qTOF are shown. Full reaction condition information described in **Fig. 4** and **Methods**. Bar graphs show consistent glycosylation results and similar modification patterns for peptide sequences and GlycTags within 4glm7 acceptor protein.

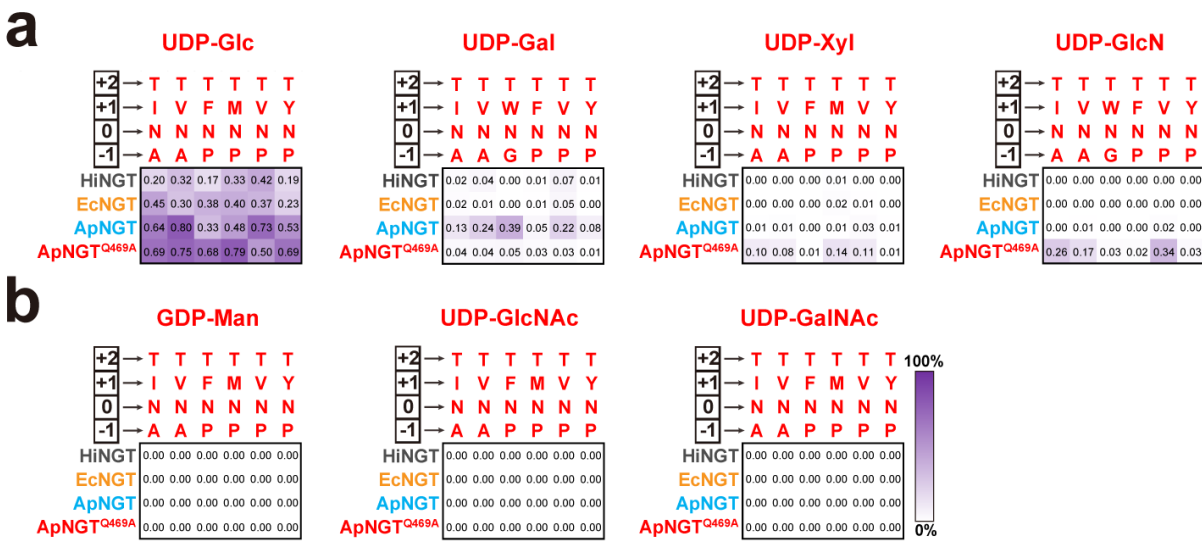

**Supplementary Figure 11: Sugar donor specificities of the selected four NGTs. (a)** Percentage intensities showing monosaccharide modification of 6 representative peptides after treatment with HiNGT, EcNGT, ApNGT, or ApNGT<sup>Q469A</sup> as well as sugar donor UDP-Glc, UDP-Gal, UDP-Xyl, or UDP-GlcN. All experiments completed with NGTs produced in CFPS except for reactions with UDP-Gal, which were screened with purified NGTs to prevent possible conversion of UDP-Gal to UDP-Glc by endogenous *E. coli* enzymes within CFPS. All four NGTs showed modification with Glc, Gal and Xyl. ApNGT and ApNGT<sup>Q469A</sup> also showed modification with GlcN. **(b)** Percentage intensities showing monosaccharide modification of 6 representative peptides after treatment with HiNGT, EcNGT, ApNGT, or ApNGT<sup>Q469A</sup> as well as sugar donor GDP-Man, UDP-GlcNAc, or UDP-GalNAc. No NGTs showed modification on these three sugar donors. The following experimental conditions were used. In experiments with UDP-Glc donor, 0.42  $\mu$ M HiNGT or 0.75  $\mu$ M EcNGT produced in CFPS was reacted at 30 °C for 21 h, or 0.1  $\mu$ M ApNGT or 0.05  $\mu$ M ApNGT<sup>Q469A</sup> produced in CFPS was reacted at 30 °C for 1 h. In experiments with UDP-Xyl, GDP-Man, UDP-GlcNAc, and UDP-GalNAc, 0.42  $\mu$ M HiNGT, 0.75  $\mu$ M EcNGT, 0.1  $\mu$ M ApNGT, or 0.05  $\mu$ M ApNGT<sup>Q469A</sup> produced in CFPS was reacted at 30 °C for 21 h. In experiments with UDP-Gal, 0.84  $\mu$ M purified HiNGT, 1.5  $\mu$ M purified EcNGT, 0.2  $\mu$ M purified ApNGT, or 0.1  $\mu$ M purified ApNGT<sup>Q469A</sup> was reacted at 30 °C for 21 h. In experiments with UDP-GlcN, 0.84  $\mu$ M HiNGT, 1.5  $\mu$ M EcNGT, 1.15  $\mu$ M ApNGT or 1  $\mu$ M ApNGT<sup>Q469A</sup> produced in CFPS was reacted at 30 °C for 21 h. All experiments were performed once (n=1). All percentage intensities of  $\geq 0.01$  are above background noise and indicative of real modification.

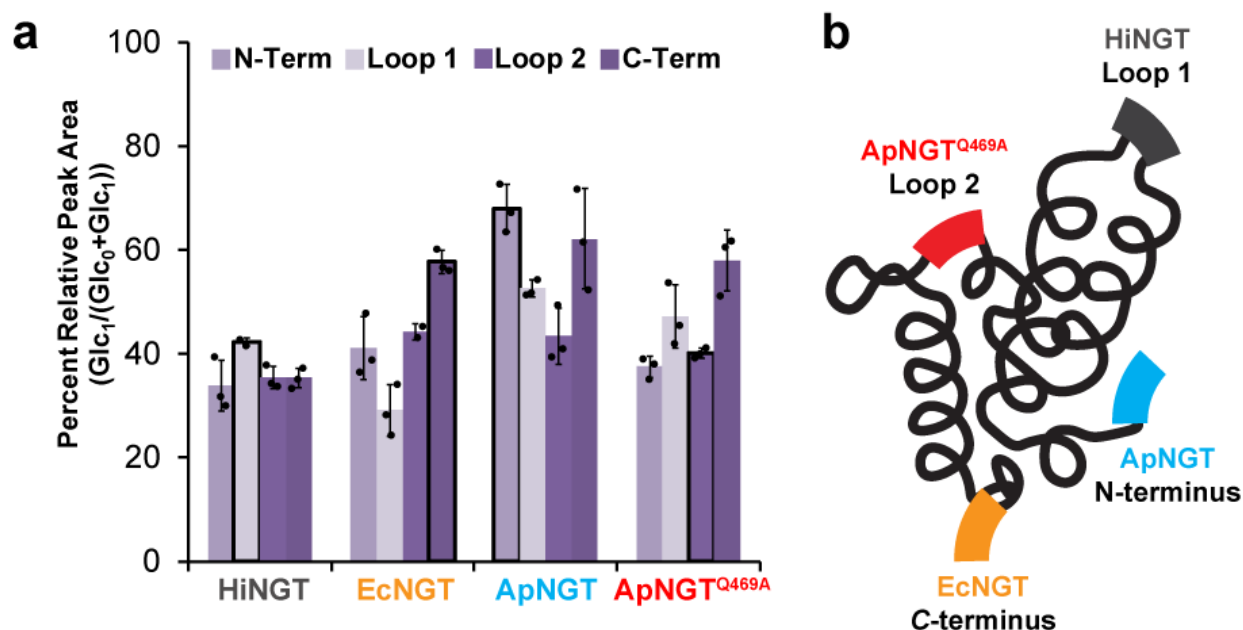

**Supplementary Figure 12: Optimization of GlycTag placement within 4glm7 protein. (a)** Bar graph comparing the preferences of HiNGT, EcNGT, ApNGT, and ApNGT<sup>Q469A</sup> for GlycTags placed into various locations of 4glm7. Preferences were determined by placing the promiscuous sequence “IYANVTL” (which our previous analyses indicated could be easily modified by all four NGTs) at the *N*-terminus, *C*-terminus, replacing N26\_D32 in Loop 1, or replacing S58\_S64 in Loop 2 of wildtype Im7. Each of these versions of Im7 containing only one glycosylation site were purified from overexpression in cells using plasmids pET.BCS.Generalist1-4, reacted with each NGT and UDP-Glc, purified again using magnetic Ni-NTA beads, and then analyzed by LC-qTOF intact protein analysis. Glycosylation was quantified as previously described<sup>6, 19</sup> by integrating extracted ion chromatograms of the three highest intensity charge states of the glycosylated and aglycosylated intact protein using Bruker Compass Data Analysis software. Average and S.D. of percent relative peak areas of the glycosylated and aglycosylated products from n=3 independent IVGs, purification, and LC-qTOF analyses are shown. IVG reactions were performed by combining 5 μM of the purified Im7 variant; 2.5 mM UDP-Glc; and 0.4 μM HiNGT, 0.25 μM EcNGT, 0.05 μM ApNGT, or 0.025 μM ApNGT<sup>Q469A</sup> and incubating for 4 h at 30 °C. While we did not observe drastic differences in the positional preferences of each NGT in **a**, we determined that Loop 1, *C*-terminus, and the *N*-terminus were preferred by HiNGT, EcNGT, and ApNGT, respectively. Because ApNGT<sup>Q469A</sup> is last in the sequential glycosylation reaction, its GlycTag was assigned the remaining Loop2 site. Outlined bars indicate assigned positions for each NGT. **(b)** Positioning of NGT-GlycTag pairs in final design of 4glm7 protein based on results in **a**.

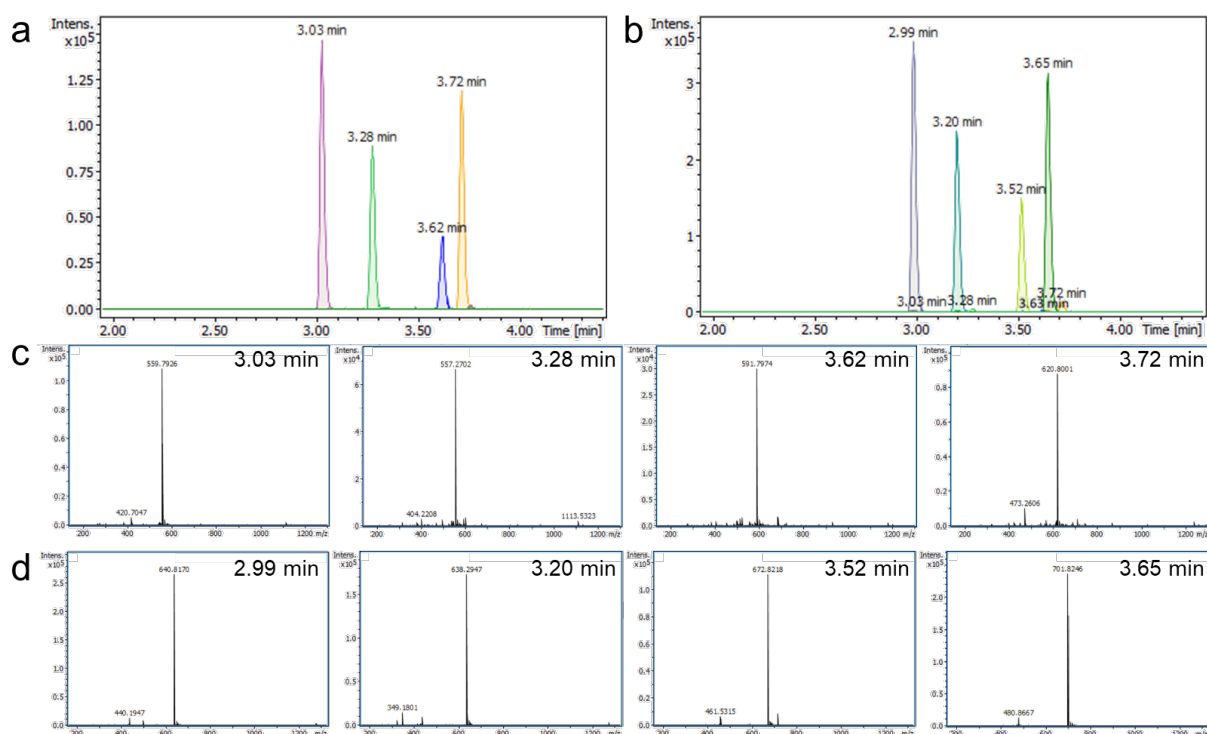

**Supplementary Figure 13: Representative LC-qTOF peptide chromatograms MS spectra for trypsinized 4gIm7.** (a) Representative extracted ion chromatograms (EICs) from LC-qTOF glycopeptide analysis of aglycosylated, trypsinized 4gIm7. EICs based on theoretical m/z values for +2 charged peptide products arising from trypsinization of unglycosylated 4gIm7, each containing one engineered GlycTag. Trypsinized peptides, targeting NGT, theoretical m/z values, and observed retention time are: ATTYMGNISR, EcNGT, 557.27 m/z, 3.28 min; ATTLNENVTR, ApNGT, 559.79 m/z, 3.03 min; ATTWYANVTR, HiNGT, 591.80 m/z, 3.62 min; ATTDYNLTR, ApNGT<sup>Q469A</sup>, 620.80 m/z, 3.72 min. (b) Representative extracted ion chromatograms (EICs) from LC-qTOF glycopeptide analysis of trypsinized 4gIm7 following purification from an *in vitro* glycosylation reaction containing 10  $\mu$ M 4gIm7, 2.5 mM UDP-Glc, and 0.4  $\mu$ M ApNGT<sup>Q469A</sup> incubated for 4 h at 30 °C. EICs based on theoretical m/z values for +2 charged peptide products arising from trypsinization of glycosylated 4gIm7, each containing one engineered GlycTag with glucose modification. Trypsinized glycopeptides, targeting NGT, theoretical m/z values, and observed retention time are: ATTYMGN(Glc)ISR, EcNGT, 638.30 m/z, 3.20 min; ATLLNEN(Glc)VTR, ApNGT, 640.82 m/z, 2.99 min; ATTWYAN(Glc)VTR, HiNGT, 672.82 m/z, 3.52 min; ATTDYN(Glc)LTR, ApNGT<sup>Q469A</sup>, 701.83 m/z, 3.65 min. We observed slightly decreased retention time for glycosylated peptides compared to their aglycosylated counterparts, likely due to the addition of a hydrophilic sugar moiety. (c) MS spectra from apex of each EIC shown in a at indicated retention time. (d) MS spectra from apex of each EIC shown in b at indicated retention time. All ion chromatograms extracted with  $\pm 0.01$  m/z range around theoretical m/z values. All chromatograms and spectra representative of at least n=3 independent experiments.

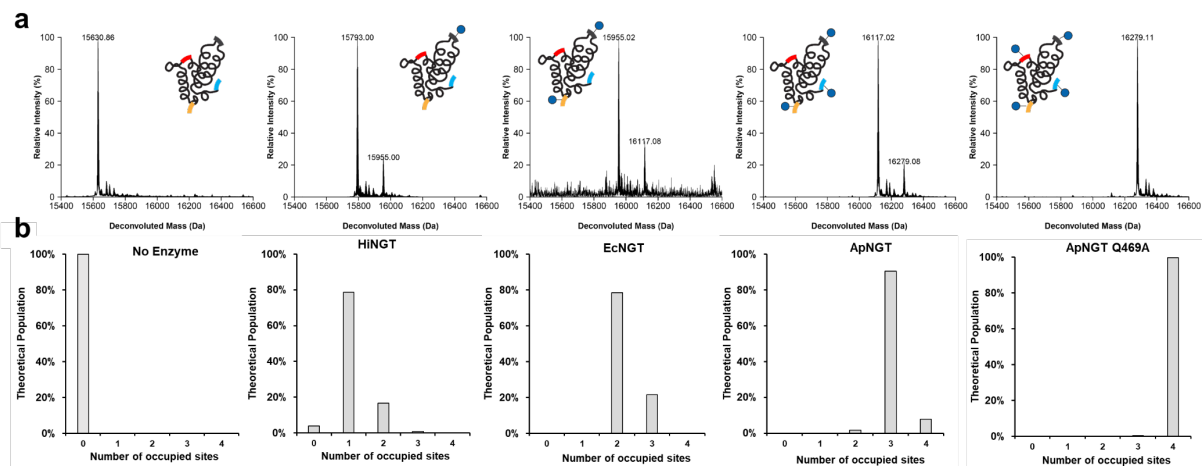

**Supplementary Figure 14: Sequential glycosylation events are not interdependent. (a)** Deconvoluted intact protein spectra of Ulp1 cleaved SUMO-4glm7 after each NGT treatment, analyzed by LC-qTOF; representative of n=3 independent experiments. Same as Fig. 5b. **(b)** Calculation of the relative amount of the SUMO-4glm7 population with different numbers of occupied glycosylation sites based on quantification of site-occupancy in Fig. 5c after each indicated NGT treatment, with the assumption of that each glycosylation event is independent. Probability calculations completed in Microsoft Office Excel 2016. The correlation between spectra in a and relative amounts in b does not suggest any interdependence of glycosylation sites.

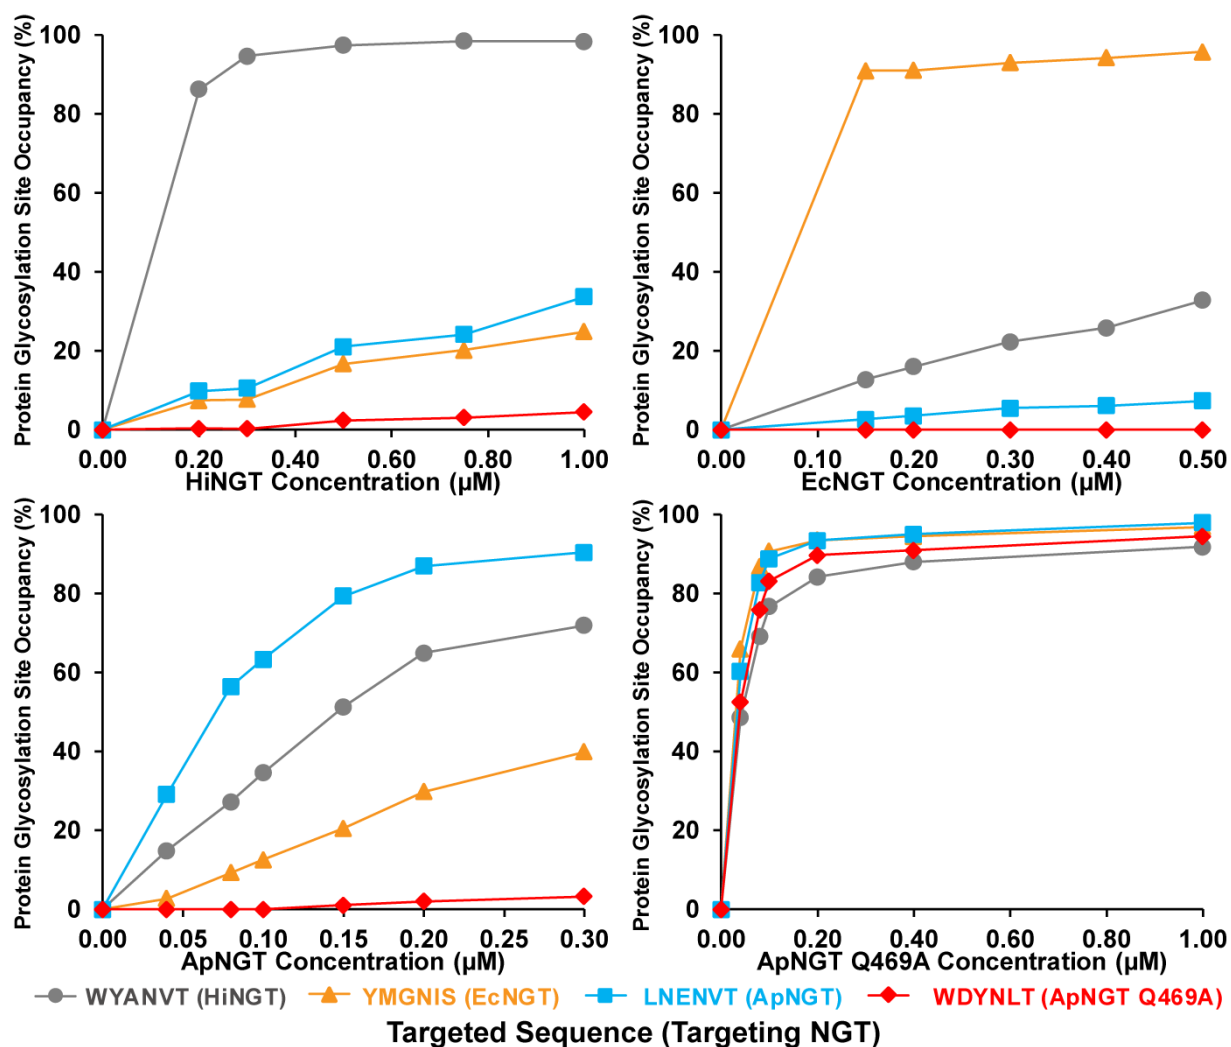

**Supplementary Figure 15: Four NGTs show differential modification of optimized glycosylation sites within SUMO-4glm7.** Purified SUMO-4glm7 bearing four optimized 6-mer GlycTags from **Fig. 3** was reacted with 2.5 mM UDP-Glc and various concentrations of purified HiNGT, EcNGT, ApNGT, or ApNGT<sup>Q469A</sup> for 4 h. After the IVG reaction, SUMO-4glm7 was purified using Ni-NTA magnetic beads, treated with trypsin, and the occupancy of each glycosylation site was determined by LC-qTOF peptide analysis. Each datapoint was determined from n=1 IVG reaction, purification, and measurement of protein glycosylation site occupancy using LC-qTOF.

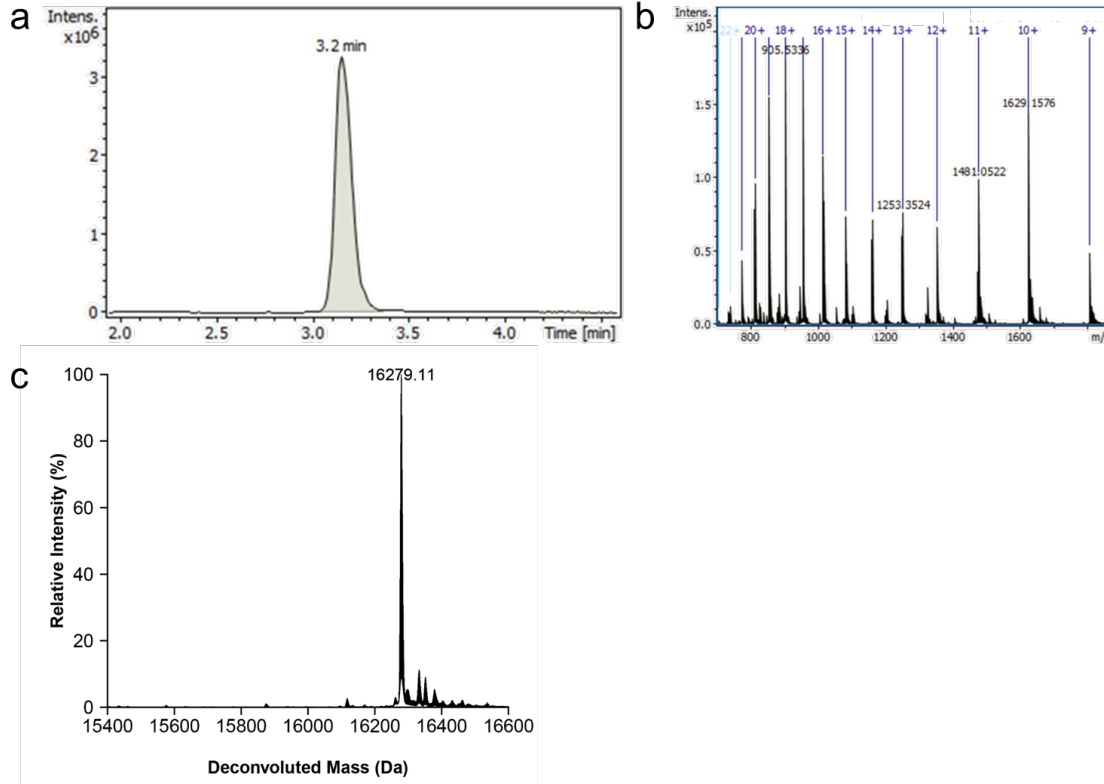

**Supplementary Figure 16: Representative LC-qTOF intact protein chromatogram, MS spectra, and deconvoluted MS spectra of SUMO-4glm7 after Ulp1 cleavage. (a)** Representative EIC from LC-qTOF intact protein analysis of SUMO-4glm7 following sequential *in vitro* glycosylation as described in **Fig. 5**. EIC extracted based on theoretical m/z value for most abundant charge state (+18) of fully glycosylated, intact protein product, 905.39 m/z  $\pm$  0.1 m/z range. **(b)** MS spectra from entire elution of EIC in **a**. **(c)** Deconvolution of MS spectra in **b** using Bruker Compass Data Analysis maximum entropy deconvolution of MS peaks within m/z range 700-2000 into mass range of 14,000-18,000 Da. Raw deconvolution data was then plotted and annotated using R Studio. Chromatogram, MS spectra, and deconvoluted spectra representative of n=3 independent sequential glycosylation experiments. Data analysis method representative of LC-qTOF intact protein analysis resulting in deconvoluted spectra in **Fig. 5** and described in **Methods**.

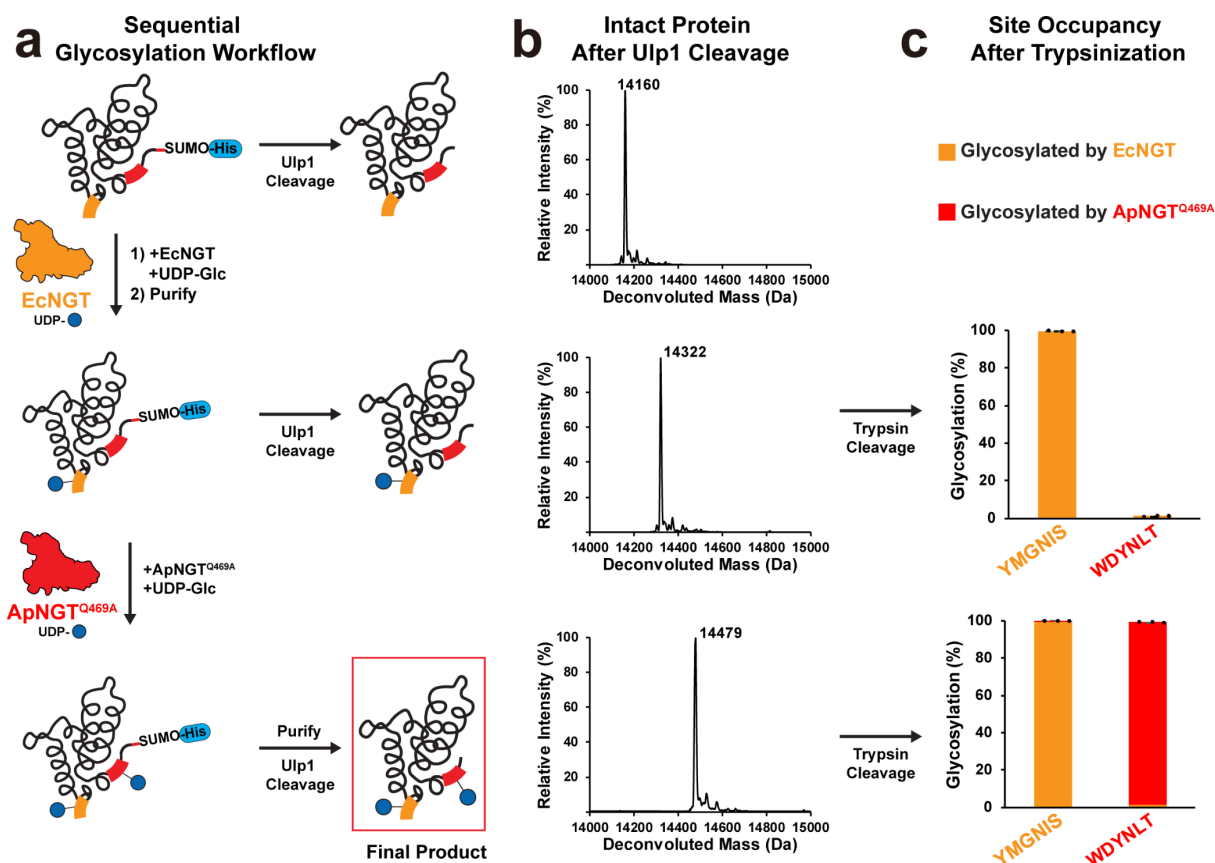

**Supplementary Figure 17: Quantitative, site-specific control of glycosylation at two GlycTags within a single Im7 protein.** (a) Workflow for control of glycosylation at two sites within 2gIm7 by sequential addition of NGTs. (b) Deconvoluted intact 2gIm7 MS spectra showing SUMO-2gIm7 cleaved by Ulp1 and analyzed by LC-qTOF before NGT treatment, after EcNGT treatment, and after treatment with ApNGT<sup>Q469A</sup>. 10  $\mu$ M purified SUMO-2gFc was incubated with 1  $\mu$ M EcNGT for 4 h at 30°C containing 2.5 mM UDP-Glc and then purified using Qiagen Ni-NTA resin, dialyzed into buffer 1, then treated with 10  $\mu$ M ApNGT<sup>Q469A</sup> and 2.5 mM UDP-Glc for 16 h at 30°C, and purified using Ni-NTA magnetic beads. The intact spectra show the addition of one glucose by EcNGT and then another by ApNGT<sup>Q469A</sup>. (c) A bar graph of site-occupancy at each of the two GlycTags after the same experiments shown in b after NGT treatment, cleavage by trypsin and analysis by LC-qTOF. Average and S.D. of n=3 separate IVG reactions and LC-qTOF runs are shown. Nearly complete conversion of each GlycTag by its intended enzyme was observed with very little off-target modification. Approximately 98% of the 2gIm7 was converted correctly during both steps.



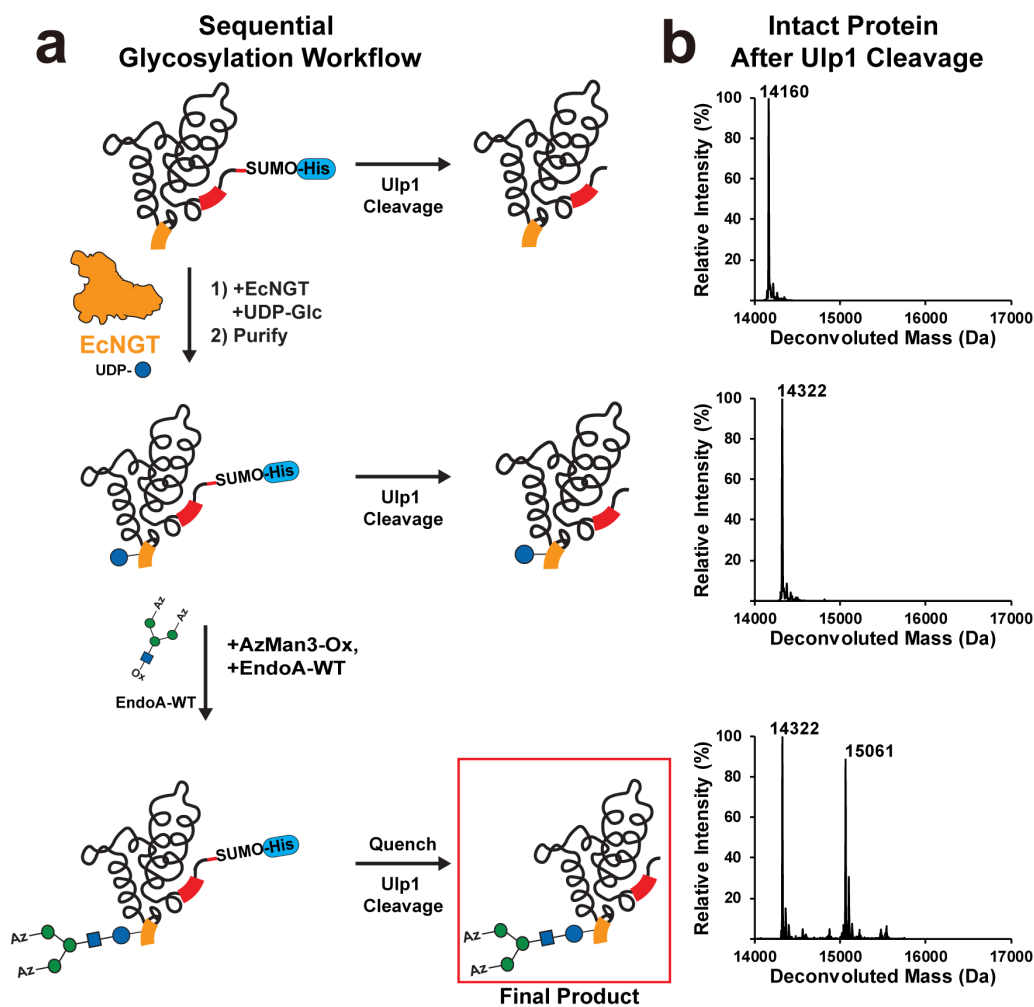

**Supplementary Figure 18: Site-specific installation of AzMan3 onto Im7 protein. (a)**

Workflow for selectively modifying EcNGT-targeted site at the C-term of 2glm7 by installing with human-like AzMan2ManGlcNAcGlc glycan (AzMan<sub>3</sub>). **(b)** Deconvoluted intact 2glm7 MS spectra showing 2glm7 before NGT treatment, after EcNGT treatment, and after transglycosylation. 10  $\mu$ M SUMO-2glm7 was monoglycosylated by treating with 1  $\mu$ M EcNGT for 4 h at 30 °C before purification with Qiagen Ni-NTA resin. 50  $\mu$ g (0.0018  $\mu$ moles) of monoglucosylated SUMO-2glm7 and 120 molar equivalents of AzMan3-ox (160  $\mu$ g, 0.218  $\mu$ moles) were incubated with 9  $\mu$ g of EndoA WT at a final enzyme concentration of 0.2  $\mu$ g/ $\mu$ l in PBS (pH=7.4) at 30 °C. An additional 120 molar equivalents of AzMan3-ox were added at 1 h. The reaction was quenched with 0.1 M glycine buffer (pH=2.7) at 2 h. Samples were analyzed by LC-qTOF after pH neutralization and Ulp1 cleavage (see **Methods**). Spectra of aglycosylated and monoglucosylated 2glm7 are also shown in **Supplementary Fig. 17**. Transglycosylation reactions were performed once (n=1) with a yield of approximately 47% based on relative areas of substrate and product peaks in deconvoluted protein spectra.

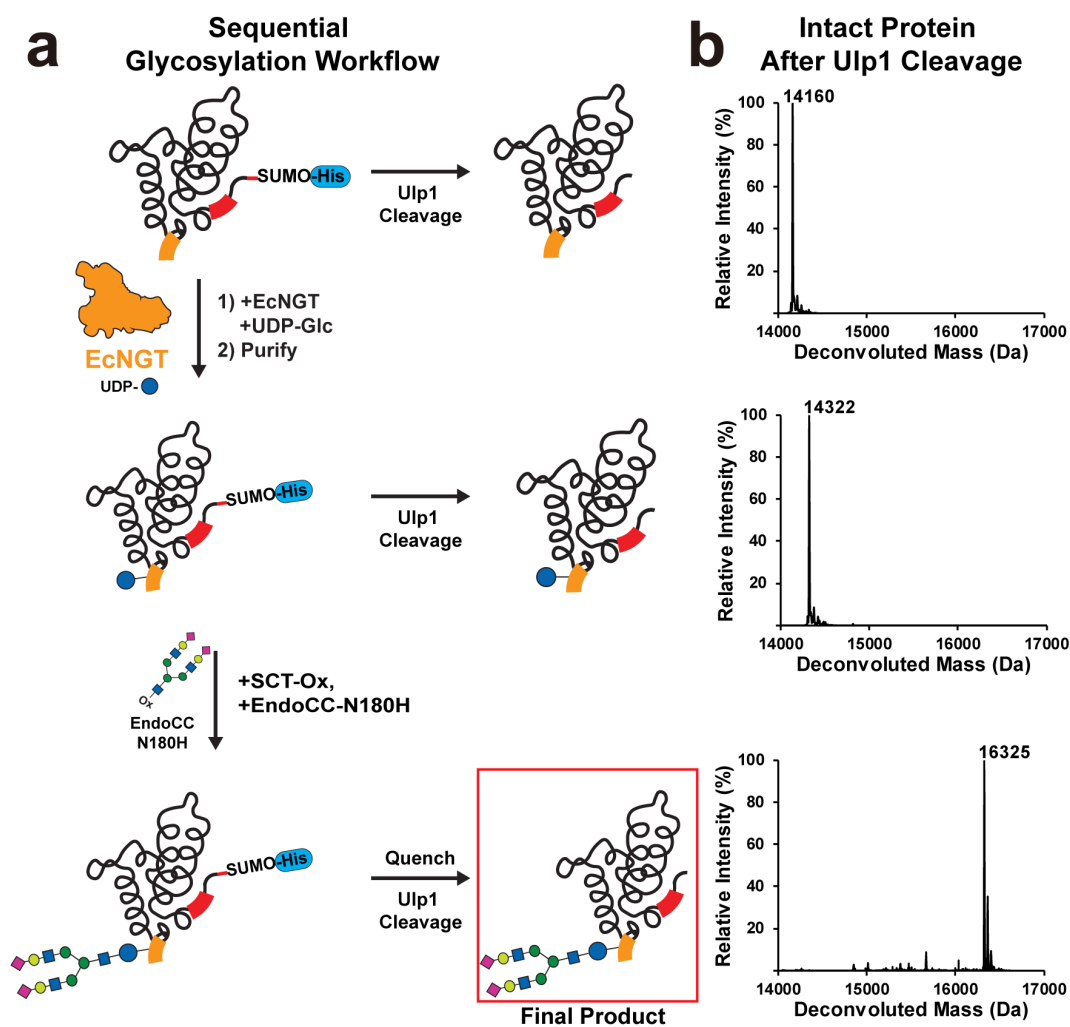

**Supplementary Figure 19: Site-specific installation of biantennary SCT onto Im7.** (a) Workflow for selectively modifying EcNGT-targeted site at the C-term of 2glm7 with human-like Sia<sub>2</sub>Gal<sub>2</sub>GlcNAc<sub>2</sub>Man<sub>3</sub>GlcNAcGlc glycan (SCT). (b) Deconvoluted intact 2glm7 MS spectra showing 2glm7 before NGT treatment, after EcNGT treatment, and after transglycosylation. 10 μM SUMO-2glm7 was monoglycosylated by treating with 1 μM EcNGT for 4 h at 30 °C before purification with Qiagen Ni-NTA resin. 50 μg (0.0018 μmoles) of monoglucosylated SUMO-2glm7 and 120 molar equivalents of SCT-ox (440 μg, 0.218 μmoles) were incubated with 0.8 μg of EndoCC<sup>N180H</sup> at a final enzyme concentration of 0.019 μg/μl in 50 mM Tris-HCl (pH=7.5) and 150 mM NaCl. The reaction was carried out at 30 °C for 30 minutes followed by quenching with 0.1 M glycine buffer (pH=2.7) for 15 minutes. pH was neutralized with Tris buffer (pH=8.5) and incubated with Ulp1 endopeptidase in 1 mM DTT at 30 °C for 1 h to cleave SUMO tag from 2glm7. The sample was analyzed by LC-qTOF (see **Methods**). Spectra of aglycosylated and monoglucosylated 2glm7 are also shown in **Supplementary Fig. 17**. Transglycosylation reactions were performed once (n=1) with apparent quantitative yield based on deconvoluted intact protein spectra.

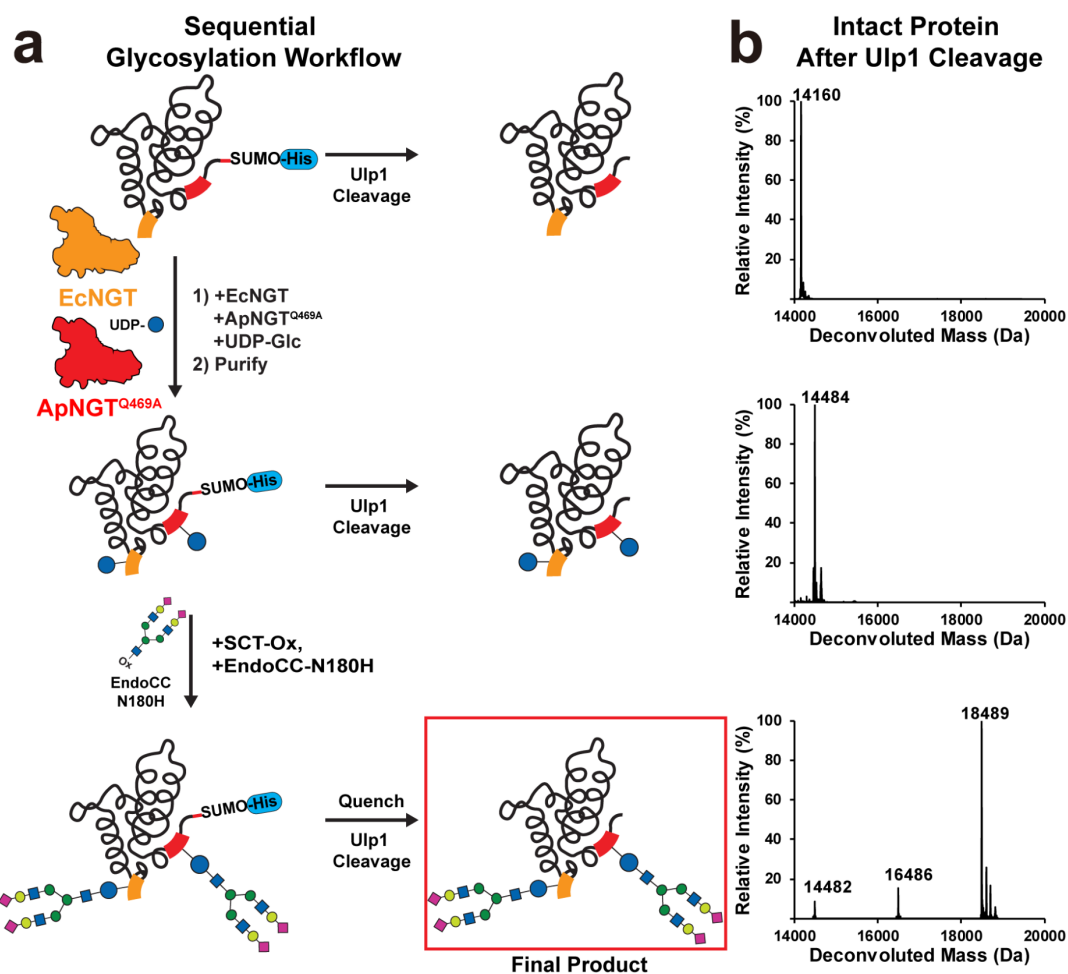

**Supplementary Figure 20: Installation of biantennary SCT glycan onto two sites within Im7.**

**(a)** Workflow for modifying sites targeted by EcNGT and ApNGT<sup>Q469A</sup> site at the N-term and C-term of 2glm7 with human-like SCT glycan. **(b)** Deconvoluted intact 2glm7 MS spectra showing 2glm7 before NGT treatment, after NGTs treatment, and after transglycosylation. 10  $\mu$ M SUMO-2glm7 was glycosylated by treating with 1  $\mu$ M EcNGT and 10  $\mu$ M ApNGT<sup>Q469A</sup> at 30°C for 16 h before purification with Qiagen Ni-NTA resin. 30  $\mu$ g (0.0011  $\mu$ moles) of diglycosylated SUMO-2glm7 and 240 molar equivalents of SCT-ox (530  $\mu$ g, 0.265  $\mu$ moles) were incubated with 0.8  $\mu$ g of EndoCC<sup>N180H</sup> at a final enzyme concentration of 0.019  $\mu$ g/ $\mu$ l in 50 mM Tris-HCl (pH=7.5) and 150 mM NaCl. The reaction was carried out at 30°C. Additional 150 molar equivalent of SCT-ox was added at 90 minutes. Reaction was quenched with 0.1 M glycine buffer (pH=2.7) at 140 minutes. Samples were analyzed by LC-MS (**Methods**). The spectrum of aglycosylated is also shown in **Supplementary Fig. 17**. Transglycosylation reactions were performed once (n=1) show approximately 81% conversion to the di-SCT-modified final product based on relative intensities of substrate and product peaks in deconvoluted protein spectra.

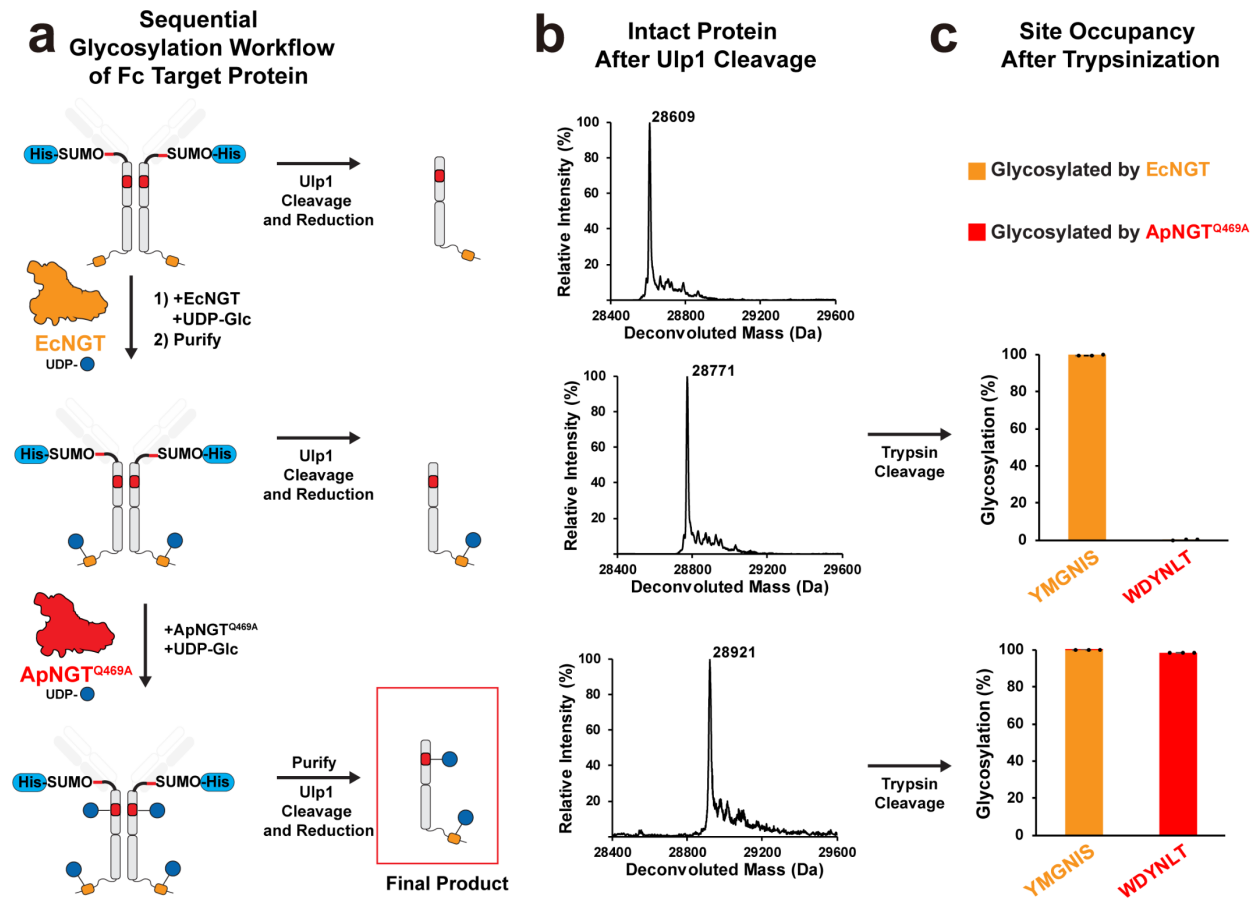

**Supplementary Figure 21: Quantitative, site-specific control of glycosylation at two GlycTags within a single human Fc protein.** (a) Workflow for control of glycosylation at two sites within 2gFc by sequential addition of NGTs. (b) Deconvoluted intact 2gFc MS spectra showing SUMO-2gFc cleaved by Ulp1 and analyzed by LC-qTOF before NGT treatment, after EcNGT treatment, and after treatment with ApNGT<sup>Q469A</sup>. 10  $\mu$ M purified SUMO-2gFc was incubated with 1  $\mu$ M EcNGT for 4 h at 30 °C containing 2.5 mM UDP-Glc and then purified using Qiagen Ni-NTA resin, dialyzed into buffer 1, and then treated with 10  $\mu$ M ApNGT<sup>Q469A</sup> and 2.5 mM UDP-Glc for 16 h at 30 °C, and purified using Ni-NTA magnetic beads. The intact LC-qTOF spectra show the addition of one glucose by EcNGT and then another by ApNGT<sup>Q469A</sup>. (c) A bar graph of site-occupancy at each of the two GlycTags after the same experiments shown in b after NGT treatment, cleavage by trypsin and analyzed by LC-qTOF. Average and S.D. of n=3 separate IVG reactions are shown. Nearly complete conversion of each GlycTag by its intended enzyme was observed with very low off-target modification. Approximately 98% of the 2gFc was correctly converted for both sites.

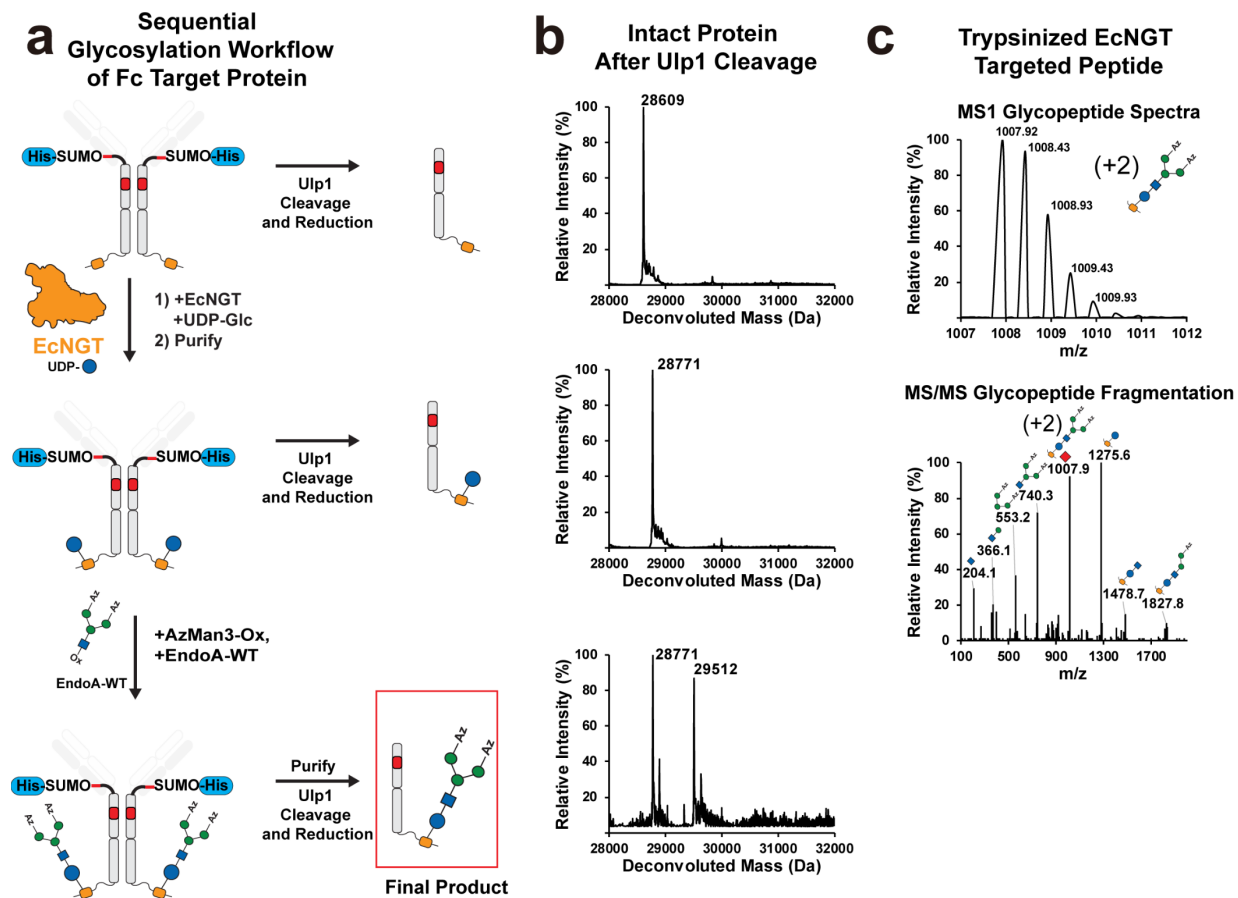

**Supplementary Figure 22: Site-specific installation of AzMan3 onto human Fc protein.** (a)

Workflow for selectively modifying EcNGT-targeted site at the C-term of 2gFc with AzMan3 glycan. (b) Deconvoluted intact 2gFc MS spectra showing SUMO-2gFc cleaved by Ulp1 and analyzed by LC-qTOF before NGT treatment, after EcNGT treatment, and transglycosylation. 10  $\mu$ M SUMO-2gFc was monoglycosylated by treating with 1  $\mu$ M EcNGT for 4 h at 30°C before purification with Qiagen Ni-NTA resin. 355  $\mu$ g (0.009  $\mu$ moles) of monoglucosylated SUMO-2gFc and 60 molar equivalents of AzMan3-ox (380  $\mu$ g, 0.514  $\mu$ moles) were incubated with 70  $\mu$ g of EndoA WT at a final enzyme concentration of 0.2  $\mu$ g/ $\mu$ l in 50 mM Tris-HCl (pH=7.5) and 150 mM NaCl. The reaction was carried out at 30 °C. An additional 60 molar equivalents of AzMan3-ox were added at 30 and 60 minutes. Reaction was quenched by adding 0.1 M glycine buffer (pH=2.7) at 90 minutes. Samples were analyzed by LC-qTOF (see **Methods**). Spectra of aglycosylated and monoglucosylated 2gFc are also shown in **Supplementary Fig. 21**. Transglycosylation reactions were performed once (n=1) with a yield of approximately 47% based on relative intensities of substrate and product peaks in deconvoluted protein spectra. (c) MS1 and MS/MS spectra of EcNGT-targeted glycopeptide after transglycosylation reaction and trypsinization. MS1 spectra shows dominant +2 charge state of ATTMGN(AzMan3)ISR glycopeptide (theoretical monoisotopic m/z = 1007.92). MS/MS spectra show glycan and glycopeptide fragments confirming glycopeptide identity. Fragments are +1 charged unless otherwise noted.

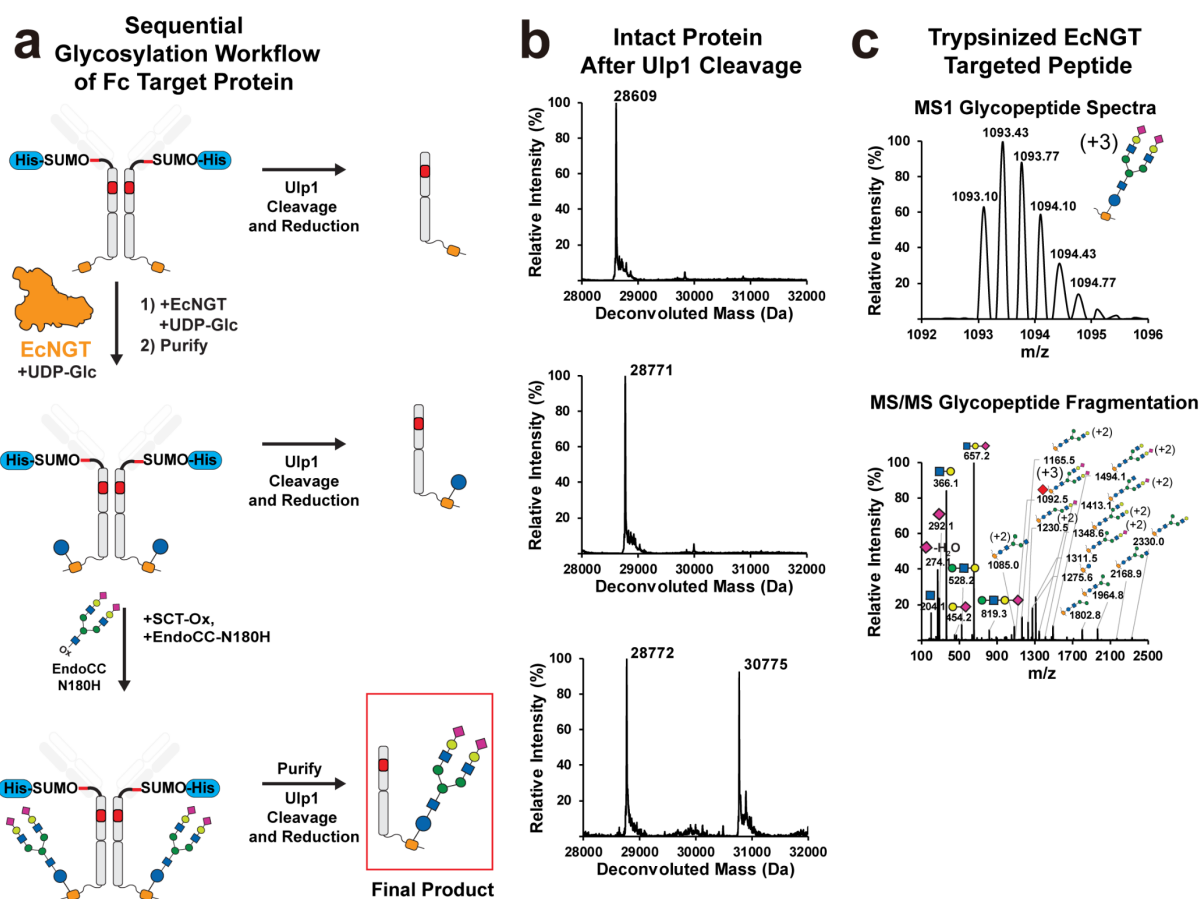

**Supplementary Figure 23: Site-specific installation of SCT onto human Fc protein. (a)** Workflow for selectively modifying EcNGT-targeted site at the C-term of 2gFc with SCT glycan. **(b)** Deconvoluted intact 2gFc MS spectra showing SUMO-2gFc cleaved by Ulp1 and analyzed by LC-qTOF before NGT treatment, after EcNGT treatment, and transglycosylation. 10  $\mu$ M SUMO-2gFc was monoglycosylated by treating with 1  $\mu$ M EcNGT for 4 h at 30°C before purification with Qiagen Ni-NTA resin. 30  $\mu$ g of monoglucosylated SUMO-2gFc and 120 molar equivalents of SCT-ox (150  $\mu$ g, 0.075  $\mu$ moles) and 0.5  $\mu$ g of EndoCC<sup>N180H</sup> at a final enzyme concentration of 0.02  $\mu$ g/ $\mu$ l in 50 mM Tris-HCl (pH=7.5) and 150 mM NaCl, at 30 °C for 30 minutes. Samples were analyzed by LC-qTOF (see **Methods**). Spectra of aglycosylated and monoglucosylated 2gFc are also shown in **Supplementary Fig. 21**. Transglycosylation reactions were performed once (n=1) with a yield of approximately 48% based on relative intensities of substrate and product peaks in deconvoluted protein spectra. **(c)** MS1 and MS/MS spectra of EcNGT-targeted glycopeptide after transglycosylation reaction and trypsinization. MS1 spectra shows dominant +3 charge state of ATTMGN(SCT)ISR glycopeptide (theoretical monoisotopic m/z = 1093.06). MS/MS spectra show glycan and glycopeptide fragments confirming MS1 glycopeptide identity. Fragments are labeled +1 charged unless otherwise noted.



### a Sequential Glycosylation Workflow

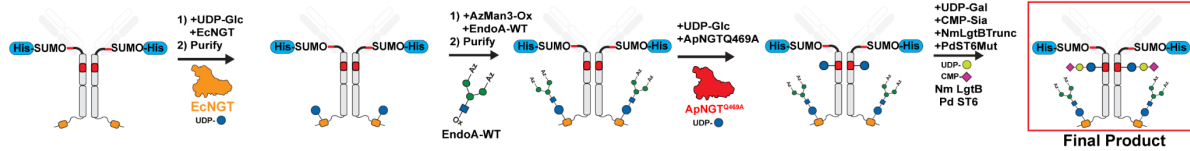

### b Trypsinized EcNGT Targeted Site

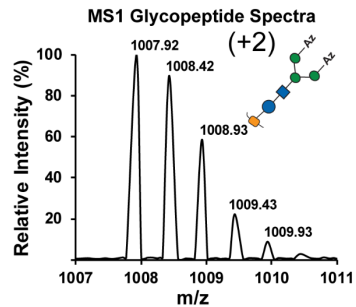

#### MS/MS Glycopeptide Fragmentation

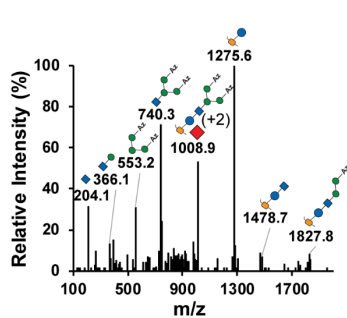

### c Trypsinized ApNGT<sup>Q469A</sup> Targeted Site

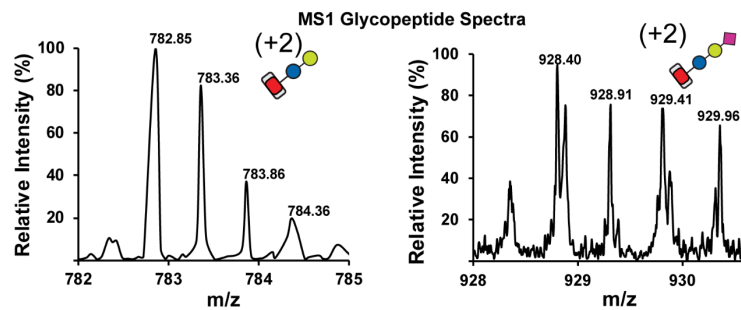

#### MS/MS Glycopeptide Fragmentation

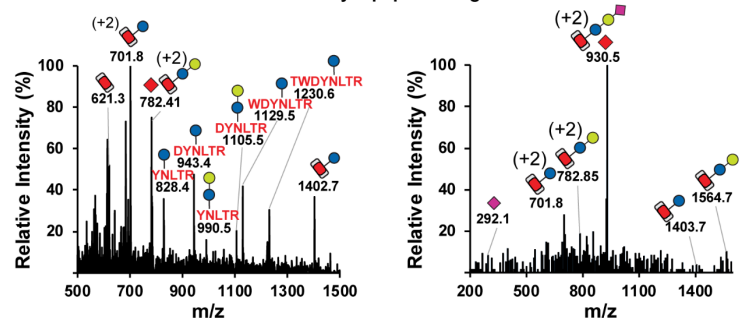

## Supplementary Figure 24: Sequential installation of AzMan3 and sialyllactose onto human Fc protein.

**(a)** Workflow for sequential modification of Fc protein with AzMan3 at EcNGT-targeted site at the C-term of 2gFc followed by sequential elaboration of an engineered ApNGT<sup>Q469A</sup>-targeted sequence at the naturally occurring Asn297 glycosylation position to Siaα2-6Galβ1-4Glc-Asn. **(b)** MS1 and MS/MS spectra of EcNGT-targeted, trypsinized glycopeptide in the final product. 100 μg (4.9 μM) of the product from **Supplementary Fig. 22** was incubated with 10 μM ApQ and 2.5 mM UDP-Glc in Buffer 1 containing 1 mM DTT at 30 °C for 16 h. MS1 spectra show dominant +2 charge state of ATTMGN(AzMan3)ISR (theoretical monoisotopic m/z = 1007.92). **(c)** MS1 and MS/MS spectra of ApNGT<sup>Q469A</sup>-targeted, trypsinized glycopeptide in the final product. SUMO-2gFc product from **b** was combined with 15 μM purified NmLgtBTrunc and 5 μM purified PdST6mut as well as 2.5 mM UDP-Gal and 2.5 mM CMP-Sia in Buffer 1 supplemented with 10 mM MnCl<sub>2</sub> and 23 mM HEPES buffer (pH = 7.5). This reaction was incubated for 16 h at 30 °C. Spectra and previously documented specificities of NmLgtB and PdST6 suggest the installation of the glycan Siaα2-6Galβ1-4Glc-Asn at the ApNGT<sup>Q469A</sup>-targeted site. MS1 spectra show dominant +2 charge state of ATTWDYN(-GlcGalSia)LTR (theoretical monoisotopic m/z = 782.64 for -GlcGal and 928.39 for -GlcGalSia). MS/MS spectra show glycan, peptide and glycopeptide fragments confirming glycopeptide identity. Fragments are +1 charged unless otherwise noted.

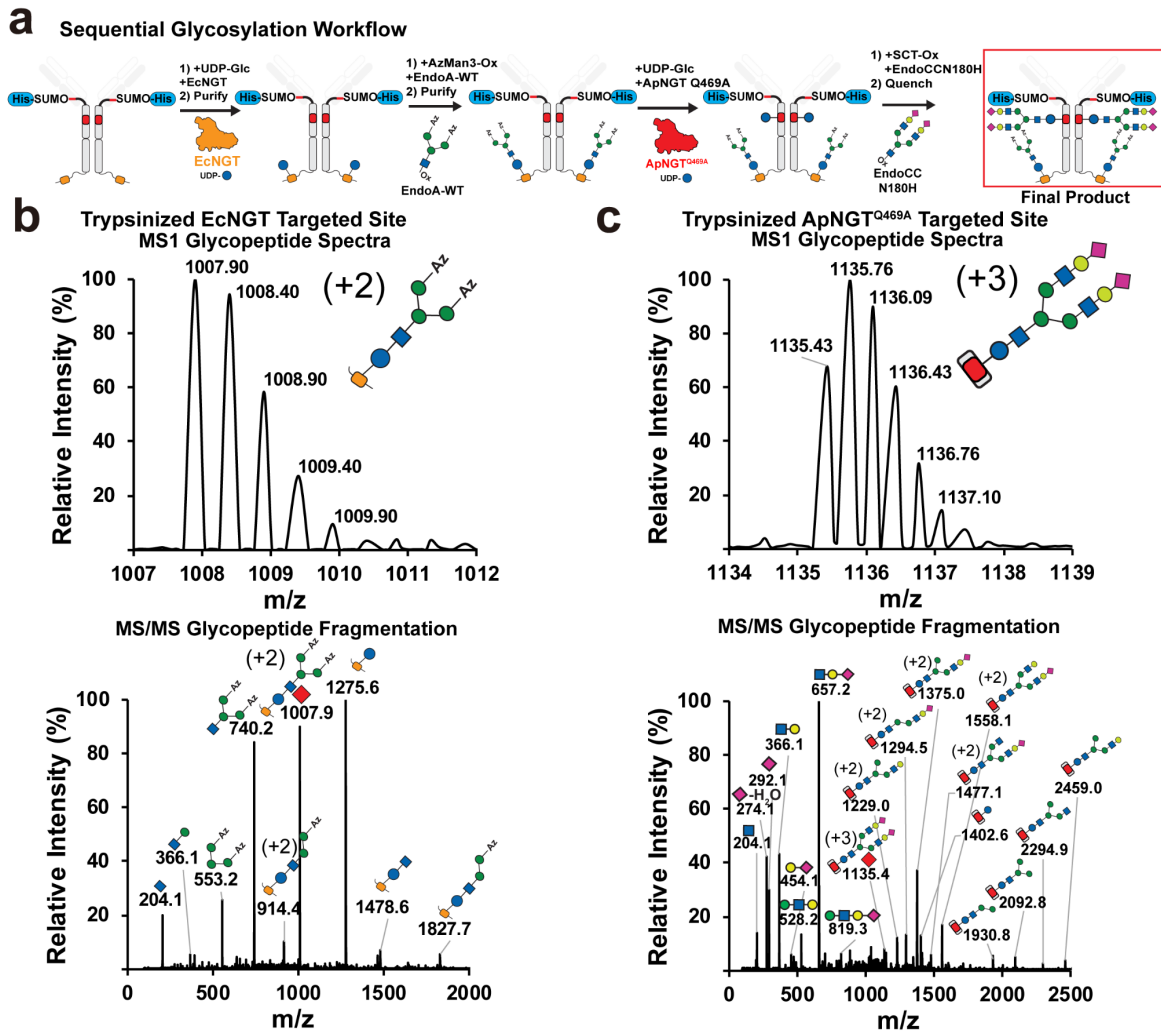

**Supplementary Figure 25: Sequential installation of AzMan3 and SCT onto human Fc protein.** (a) Workflow for sequential modification of Fc protein with AzMan3 at EcNGT-targeted site at the C-term of 2gFc followed by installation of SCT glycan at an engineered ApNGT<sup>Q469A</sup>-targeted sequence at the naturally occurring Asn297 glycosylation. (b) MS1 and MS/MS spectra of EcNGT-targeted, trypsinized glycopeptide in the final product. 100  $\mu$ g (4.9  $\mu$ M) of the product from **Supplementary Fig. 22** was exchanged into Buffer 1 and then incubated with 10  $\mu$ M ApQ and 2.5 mM UDP-Glc in Buffer 1 containing 1 mM DTT at 30 °C for 16 h. 70  $\mu$ g of the SUMO-2gFc product from this glucosylation reaction was incubated with 120 molar equivalents of SCT-ox (340  $\mu$ g, 0.170  $\mu$ moles) and 1.2  $\mu$ g of EndoCC<sup>N180H</sup> at a final enzyme concentration of 0.02  $\mu$ g/ $\mu$ l in Buffer 1 at 30 °C for 30 minutes. MS1 spectrum shows dominant +2 charge state of ATTMGN(AzMan3)ISR (theoretical monoisotopic m/z = 1007.92). (c) MS1 and MS/MS spectra of ApNGT<sup>Q469A</sup>-targeted, trypsinized glycopeptide in the final product. MS1 spectra show dominant +3 charge state of ATTWDYN(SCT)LTR (theoretical monoisotopic m/z = 1135.44). MS/MS spectra show glycan and glycopeptide fragments confirming MS1 glycopeptide identity. Fragments are labeled and +1 charged unless otherwise noted.



**Supplementary Note 1: Example DNA sequences encoding engineered Im7 protein glycosylation targets, active NGTs expressed by CFPS, as well as NGTs and Endoglycosidases expressed and purified from *E. coli*.**

**Key:**

TRANSLATED REGION

untranslated region

Promoter

Terminator

Sequences Flanking Glycosylation Sites

**Engineered Glycosylation Sequence**

*PROTEIN REGION REMOVED AFTER ULP1 CLEAVAGE*

**DNA sequence for HiNGT in pJL1 plasmid context:**

gaaat**taatac**gactcactatagg****gagaccacaacggttccctctagaaataat~~ttgtttaactttaagaaggagatatacat~~  
ATGACCAAAGAGAACCTGCAGAGCGTTCCGCAGAATACCACCGCAAGCCTGGTTGAAAGC  
AATAATGATCAGACCAGCCTGCAGATTCTGAAACAGCCTCCGAAACCGAATCTGCTGCGTCT  
GGAACAGCATGTTGCAAAAAAAGATTATGAACTGGCATGCCGTGAACTGATGGCAATTCTGG  
AAAAATGGATGCCAATTTTGGTGGCGTGCACGATATTGAATTTGATGCACCGGCACAGCTG  
GCATATCTGCCGAAAACTGCTGATTCATTTTGCAACCCGTCTGGCAAATGCAATTACCAC  
CCTGTTTAGCGATCCGGAACCTGGCAATTAGCGAAGAGGGTGCACCTGAAAATGATTAGCCTG  
CAGCGTTGGCTGACCCTGATTTTGAAGCAGCCCGTATGTTAATGCAGATCATATCCTGAA  
CAAATACAACATCAATCCGGATAGCGAAGGTGGTTTTTCATCTGGCAACCGATAATAGCAGCA  
TTGCCAAATTTTGCATCTTTTATCTGCCTGAGAGCAACGTTAATATGAGCCTGGATGCACTGT  
GGGCAGGTAATCAGCAGCTGTGTGCAAGCCTGTGTTTTGCACTGCAGAGCAGCCGTTTTAT  
TGGCACCGCCAGCGCATTTTCATAAACGTGCAGTTGTTCTGCAGTGGTTTCCGAAAAAACTG  
GCAGAAATTGCAAATCTGGATGAACTGCCTGCAAACATTCTGCATGATGTTTATATGCATTGC  
AGCTATGATCTGGCCAAAAACAAACATGATGTTAAACGTCCGCTGAATGAACTGGTGCCTAA  
ACATATTCTGACCCAGGGTTGGCAGGATCGTTATCTGTATACCCTGGGTAAAAAAGATGGTA  
AACCGGTTATGATGGTTCTGCTGGAACATTTTAACAGCGGTCATAGCATTATCGTACCATA  
GCACCAGCATGATTGCAGCACGTGAAAAATTCTATCTGGTTGGTCTGGGTGCATGAAGGCGT  
TGATAATATTGGTTCGTGAAGTGGTTGATGAGTTCTTTGAGATTAGCAGCAACAACATTATGGA  
ACGCCTGTTTTTTATCCGCAAACAGTGTGAAACCTTTAGCCTGCCGTGTTTTATATGCCGA  
GCATTGGTATGGATATCACCACCATTTTTGTTAGCAATACACGTCTGGCACCGATTGAGGCA  
GTTGCACTGGGTCATCCGGCAACCACCATAGCGAATTTATTGATTATGTGATCGTCGAGGA  
TGATTACGTTGGTAGCGAAGATTGTTTTAGCGAAACCCTGCTGCGCCTGCCGAAAGATGCA  
CTGCCGTATGTTCCGAGCGCACTGGCACCGCAGAAAGTGGATTATGTTCTGCGTGAAAATC  
CGGAAGTTGTGAATATTGGTATTGCAGCAACCACCATGAACTGAATCCGGAATTTCTGCTG  
ACACTGCAAGAAATTCGTGATAAAGCCAAAGTAAAATTCACCTCCATTTTGCCTGGGTCA  
GTCAACCGGTCTGACCCATCCGTATGTGAAATGGTTTATTGAAAGCTATCTGGGTGATGATG

CAACCGCACATCCGCATGCACCGTATCATGATTATCTGGCCATTCTGCGCGATTGTGATATG  
CTGCTGAATCCGTTTCCGTTTGGTAATACCAATGGCATTATTGATATGGTTACCCTGGGCCTG  
GTTGGTGTGTTGTA AACCGGTGATGAAGTGCATGAACATATTGATGAAGGTCTGTTAAACG  
TCTGGGCCTGCCGAATGGCTGATTGCAGATACCCGTGAAACCTATATTGAATGTGCACTGC  
GCCTGGCGGAAAATCATCAAGAACGCCTGGAAGTGCCTGTTATATCATTGAAAATAATGGC  
CTGCAGAACTGTTTACCGGTGATCCGCGTCCGCTGGGCAAATTCTGCTGAAAAAACCA  
ATGAGTGGAAACGCAAACATCTGAGCAAAAAGGATCCTGGAGCCATCCGCAGTTCGAAAA  
ATAAgtcgaccggctgtaacaagccccgaaaggaagctgagttggctgctgccaccgctgagcaataactagc**ataaccctg**  
**gggcctctaacgggtcttgaggggtttttgctgaaag**

**DNA sequence for EcNGT in pJL1 plasmid context:**

gaaat**taatac**gact**cactatagg**gagaccacaacggttccctctagaataatmttgtttaacttaagaaggagatatacat  
ATGATGAGCCACAAAACCGATACCGCACCGGTTCAAGAACAGGCAGGCCTGACCTTTCGTC  
TGAAACCTTTGAATGGCAGGTTTCATCAGGGTCTGAATGAAGAAGCAGCACGTAGCCTGAT  
TAGCCTGCTGCAGCTGCTGGATCGTCATTATGCACAGTGGGGTGAAGCTTTAGCGCATGG  
GCACCGGGTATGACCGCAGAAGAAATTAATCCGCATCTGTGTACCCGTATTGCCGGTGCAAT  
TACCGCACTGTTTAGCCGTCCGGGTTTTCTGTGTTAGTGATGGTGGTTTTGCAGAACTGATG  
GATTATCATCGTTGGCTGGCAATTATCTTTGCCGTTAGCGATTATCGTCATGGCGATCATATTA  
TTCGCAATATTAACGCAGCCGGTGGTGGTGTGTTGCACCGCTGACCCTGAATGCCGATAAT  
CTGCAGCTGTTTTGTCTGAGCTATTATCCGGATTACAGATTGCACTGCAGCCGGAACCGT  
GTGGCAGTATGATCGTCAGACCGTTGTTCTGTCTGTTTTTGCAGTCTGAGCGGTCGTGCA  
CTGCCGACACCGGCAGCACATCAGAAACGTGAACATCTGCTGGCATGGCTGCCGGAACGT  
CTGAAAGAAATTGATAGCCTGGAATTTCTGCCTGGTAAAGTTCTGCATGATGTGTATATGCAT  
TG TAGCTATGCCGATCTGCCGAAAAACATCGTATTAACAAGAAATCAATCGTCTGACCGC  
ACGTGCACTGGAACAGACCTATGCAGATTGTCTGCCGGTTCGTGCACCGGAAGCAGCCCG  
TCAGAAACCGGTTCTGGCAGTTGTTCTGGAATGGTTTACCTGTCAGCATAGCATTATCGTA  
CCCATAGCACCAGCATGCGTGCCCTGCGTGAACATTTTCATCTGCTGGGTATTGCACAGCC  
TGGTGCAACCGATGAAATTACCCGTGAAGTTTTGATGAATTTCTGTAAGTCTGAGCGCAGAAA  
ATGTTGTTGGTGTGCAATTCGTTGCCTGAGCGAAGTTCGTCCGGATGTTATCTATTATCCTA  
GCGTTGGTATGTTTCCGCTGACCGTTTATCTGACAGCACTGCGTCTGGCACCCTGCAGCT  
GATGGCACTGGGTCATCCGGCAACCACCTGGTCAGAACATATTGATGGTGTCTGGTTGAA  
GAAGATTATCTGGGCGATCCGGCATGTTTTAGCGAAACCGTTTGTGCAGTTCGAAAGATGC  
CATTCCGTATATTCCGCCTGCAAGCACCGAACGTGTTCTGCCTGAACGTACCCCGTTTTCTG  
GATCGTGCAAAAGCAGCATGGCCTGCAGCACTGCCGGTGCCTGTTGCAGTTTGTGCAAGC  
GTTATGAAAATTAACCCTGGTTTTCTGGATACCCTGCGCGAAATTAGCGATCGTAGCCGTGTT  
CCGGTTCAGTTTTGTTTTGGATGGGTTTTGCCAGGGCCTGACCCTGGATTATCTGCGTC  
GTGCCATTCGTCAGGCGCTGCCGACAGCCGAAGTTAATGCACACATGCCGGTTCAGGCATA  
TCAGCAGGCACTGAATAGCTGTGAAGTGTGTTAATCCGTTTCCGTTTGGTAATACCAATG  
GTCTGGTTGATACCGTTCGCCAGGGTCTGCCAGGTGTTTGTATGACCGGTCCGGAAGTTCA  
TACCCATATCGATGAAGGTCTGTTTCTGTCGTCTGGGCCTGCCGGAAGCACTGATTGCACGT

GATCGCGAAGAATATATCACCGCAGTTCTGAGCCTGACCGAAACACCGCGTCTGCGCGAAC  
GTCTGCAGAAATATCTGACGGAAAATGATGTTGAGAAAGTGTGTTTTGAAGGCCGTCCGGA  
TAAATTTGCGGAACGTGTTTGGCAGCTGTGGGAAGCCCGTAGCCATCGTCAAGAAGAAGGC  
GCAGAAGGATCCTGGAGCCATCCGCAGTTCGAAAAATAAgtcgaccggctgctaacaagcccgaag  
aagctgagttggctgctgccaccgctgagcaataactagc**ataaccctggggcctctaacgggtcttgaggggtttttgctgaaag**

**DNA sequence for ApNGT (Q469A) in pJL1 plasmid context:**

gaaat**taatac**gact**actatagg**gagaccacaacggtttccctctagaaataattttgtttaactttaagaaggagatatacat  
ATGGAACGAGAATAAACCGAACGTGGCAAATTTGAAGCAGCAGTTGCAGCCAAAGATTA  
TGAAAAGCATGTAGCGAGCTGCTGCTGATTCTGAGCCAGCTGGATAGCAATTTTGGTGGC  
ATTCATGAAATCGAGTTCGAGTACCCAGCTCAGCTGCAGGATCTGGAGCAGGAAAAAATTG  
TGACTTTTTGCACCCGTATGGCGACTGCCATCACACCCTGTTCTCTGACCCGGTTCTGGA  
AATCTCCGACCTGGGTGTGCAGCGTTTCCTGGTTTATCAGCGTTGGCTGGCGCTGATCTTC  
GCTAGCAGCCCGTTCGTGAACGCAGACCACATCCTGCAGACTTACAACCGTGAACCGAAC  
CGCAAAAACCTCCCTGGAAATTCACCTGGACTCTAGCAAGTCCTCTCTGATTAATTTTGCAT  
CCTGTACCTGCCGGAATCTAATGTGAACCTGAATCTGGATGTGATGTGGAACATTTCCCGG  
AGCTGTGTGCCTCTCTGTGCTTTGCGCTGCAAAGCCCGCGTTTTTGTGGCACCAGCACCG  
CCTTAACAACGCGCGACCACTTCTGCAGTGGTTCCCGCGTCATCTGGACCAGCTGAAAA  
CCTGAACAACATCCCGTCCGCTATCTCTCATGACGTGTATATGCACTGTTCTTACGACACCA  
GCGTTAACAAGCACGATGTTAAGCGCGCGCTGAATCACGTGATTCGTCGCCACATCGAATC  
CGAATACGGTTGGAAAGATCGTGATGTGGCTCACATCGGTTATCGCAACAACAAACCGGTTA  
TGGTGCTTCTGCTGGAACATTTTCATAGCGCGCACTCTATCTACCGTACTCACTCTACCAGC  
ATGATCGCCGCGCGCAACACTTCTATCTGATCGGCCTGGGTTCCCCGAGCGTTGACCAG  
GCCGGTCAGGAGGTTTTCGATGAATTCACCTGGTAGCGGGTGACAACATGAAGCAAAAAC  
TGGAATTCATTCGTTCTGTGTGCGAAAGCAATGGTGCGGCAATTTTCTACATGCCGAGCATC  
GGTATGGATATGACCACCATCTTCGCGTCCAATACCCGTCTGGCGCCGATTCAGGCAATCG  
CCCTGGGCCACCCGGCGACTACTCACTCCGACTTCATTGAATACGTTATCGTGGAAGACGA  
CTACGTCGGCTCTGAGGAATGCTTCTCTGAAACCCTGCTGCGTCTGCCGAAAGACGCTCTG  
CCGTATGTTCCGTCCGCCCTGGCTCCGGAGAAAGTTGATTACCTGCTGCGTGAAAACCCTG  
AAGTTGTCAACATCGGTATTGCCTCTACCACTATGAAGCTGAACCCGTACTTCCTGGAAGCA  
CTGAAGGCCATTCGTGACCGTGCGAAGGTGAAAGTGCACTTCCACTTCGCACTGGGCGCG  
TCCAATGGTATCACTCACCTTACGTTGAACGCTTTATCAAATCTTACCTGGGCGACAGCGC  
TACCGCGCACCCGCACTCTCCGTACCACCAGTACCTGCGTATTCTGCACAACCTGCGATATG  
ATGGTAAACCCTTTTCCGTTTGGTAATACCAATGGTATTATTGACATGGTAACCCTGGGTCTG  
GTAGGTGTTTGCAAAACCGGTGCGGAAGTCCACGAACATATCGATGAAGGCCTGTTCAAAC  
GTCTGGGCCTGCCGGAATGGCTGATTGCAAACACCGTGGACGAATACGTGGAACGTGCAG  
TGCGCCTGGCCGAGAACCATCAGGAACGTCTGGAACCTGCGTCGTTACATTATTGAAAACAA  
TGGCCTGAACACCCTGTTACCGGCGACCCACGCCCGATGGGTGAGGTGTTCTGGAAAA  
ACTGAACGCATTCTGAAGGAAAATAAgtcgaccggctgctaacaagcccgaaggaagctgagttggctgct  
gccaccgctgagcaataactagc**ataaccctggggcctctaacgggtcttgaggggtttttgctgaaag**

**DNA sequence for ApNGT in pJL1 plasmid context:**

gaaat**taatac**gactcactataggagaccacaacggttccctctagaaataat**ttgtt**aactttaagaaggagatatacat  
ATGGAAAACGAGAATAAACCGAACGTGGCAAATTTGAAGCAGCAGTTGCAGCCAAAGATTA  
TGAAAAAGCATGTAGCGAGCTGCTGCTGATTCTGAGCCAGCTGGATAGCAATTTTGGTGGC  
ATTCATGAAATCGAGTTCGAGTACCCAGCTCAGCTGCAGGATCTGGAGCAGGAAAAAATTG  
TGACTTTTGCACCCGTATGGCGACTGCCATCACCACCCTGTTCTCTGACCCGGTTCTGGA  
AATCTCCGACCTGGGTGTGCAGCGTTTCCTGGTTTATCAGCGTTGGCTGGCGCTGATCTTC  
GCTAGCAGCCCGTTCGTGAACGCAGACCACATCCTGCAGACTTACAACCGTGAACCGAAC  
CGCAAAAACCTCCCTGGAAATTCACCTGGACTCTAGCAAGTCCTCTCTGATTAATTTTGCAT  
CCTGTACCTGCCGGAATCTAATGTGAACCTGAATCTGGATGTGATGTGGAACATTTCCCCGG  
AGCTGTGTGCCTCTCTGTGCTTTGCGCTGCAAAGCCCGCGTTTTTGTGGCACCAGCACC  
CCTTTAACAAACGCGCGACCATTCTGCAGTGGTTCCTCGCTCATCTGGACCAGCTGAAAA  
CCTGAACAACATCCCGTCCGCTATCTCTCATGACGTGTATATGCACTGTTCTTACGACACCA  
GCGTTAACAAAGCAGATGTTAAGCGCGCGCTGAATCACGTGATTCGTCGCCACATCGAATC  
CGAATACGGTTGGAAAGATCGTGATGTGGCTCACATCGGTTATCGCAACAACAAACCGGTTA  
TGGTCGTTCTGCTGGAACATTTTCATAGCGCGCACTCTATCTACCGTACTCACTCTACCAGC  
ATGATCGCCGCGCGCAACACTTCTATCTGATCGGCCTGGGTTCCTCGAGCGTTGACCAG  
GCCGGTCAGGAGGTTTTCGATGAATTCCACCTGGTAGCGGGTGACAACATGAAGCAAAAAC  
TGGAATTCATTCGTTCTGTGTGCGAAAGCAATGGTGCGGCAATTTTCTACATGCCGAGCATC  
GGTATGGATATGACCACCATCTTCGCGTCCAATACCCGTCTGGCGCCGATTCAGGCAATCG  
CCCTGGGCCACCCGGCGACTACTCACTCCGACTTCATTGAATACGTTATCGTGGAAGACGA  
CTACGTCGGCTCTGAGGAATGCTTCTCTGAAACCCTGCTGCGTCTGCCGAAAGACGCTCTG  
CCGTATGTTCCGTCCGCCCTGGCTCCGGAGAAAGTTGATTACCTGCTGCGTGAAAACCCTG  
AAGTTGTCAACATCGGTATTGCCTCTACCACTATGAAGCTGAACCCGTAATTCCTGGAAGCA  
CTGAAGGCCATTCTGACCGTGCGAAGGTGAAAGTGCACCTTCCACTTCGCACTGGGCCAG  
TCCAATGGTATCACTCACCCTTACGTTGAACGCTTTATCAAATCTTACCTGGGCGACAGCGC  
TACCGCGCACCCGCACTCTCCGTACCACCAGTACCTGCGTATTCTGCACAACCTGCGATATG  
ATGGTAAACCCTTTTCCGTTTGGTAATACCAATGGTATTATTGACATGGTAACCCTGGGTCTG  
GTAGGTGTTTGCAAACCCGGTGCAGGAAGTCCACGAACATATCGATGAAGGCCTGTTCAAAC  
GTCTGGGCCTGCCGGAATGGCTGATTGCAAACACCGTGGACGAATACGTGGAACGTGCAG  
TGCGCCTGGCCGAGAACCATCAGGAACGTCTGGAACCTGCGTCGTTACATTATTGAAAACAA  
TGGCCTGAACACCCTGTTACCCGGCGACCCACGCCCGATGGGTCAGGTGTTCTCTGAAAA  
ACTGAACGCATTCTGAAGGAAAATAAgtcgaccggctgctaacaagcccgaaggaagctgagttggctgct  
gccaccgctgagcaataactagc**ataacccttggggcctctaaacgggtcttgaggggtttttg**ctgaaag

**DNA sequence for YpNGT in pJL1 plasmid context:**

gaaat**taatac**gactcactataggagaccacaacggttccctctagaaataat**ttgtt**aactttaagaaggagatatacat  
ATGGCCGATAAAAGCGTTGAACTGACACCGGTTGTTGAAGCACCGGTGGTTTTTAGCCTGC

CGTATTTTGAATTTCTGGTTTGTACCCGTCGTTATGAAGATGCAGGTCGTCTGCTGATTCTGA  
TGCTGGAAAACTGGATACCCAGTATGGTCGTTGGGATGTGTTAGCCTGAATAAACAGCCG  
ATTCAGCAGCAAGAGTATTATTGTAATCGTCTGGCAGCAGCAATTGGTTGTCTGTTTAGCGAT  
CCGGGTTTTTGTATTAGCGAAACCGGCTTTCTGCAGCTGATTAACTTTCATCGTTGGATTGC  
ACTGATTTTTGCAGCAAGCACCTTTGGTCATGCAGATCATGTTATTACCAATCTGAATGAAGC  
CGGTAATGGTTGTAGCCATCCGCTGCGTTTTGAACGTAATAACTTTCTGAAATTTTGCCTGAT  
GTATCTGCCGGAAAGCGGTATTCCGCTGCAGCCGGATATTCTGTGGCAGTTTAATCCGCAG  
GCAACCGCAGCACTGTTTCTGGCACTGCTGAGTCCGCGTATTCTGCCGAGCGCAGCAGGT  
CATGAAAAACGTGAAACCCTGCTGGCATGGCTGCCTGAAAACTGCTGACCCTGATTAGCC  
TGGAAGGCCTGCCGGAACGCATTCTGCATGATGTTTATATGCATTGTAGCTATGCCGATATG  
GCCAAAAACATAACCATTAAACGCAGCATCAATTTTCATCTGCGTAAAACCATGCTGAAAAAT  
GGTCTGAGCGATATGAATGAACTGCCTCCGCTGCGCAGTAAACCGCTGATGCTGGTTATTCT  
GGAATGGTTTAATAGCGGTCATAGCATTATCGTACCCATAGCAGCACCCCTGCGTGCAGCAC  
GTGATCAGTTTAGCACACATGGTGTGCAATTGCCGAAGCAACCGATGATATTACCCGTAAA  
GTGTTTGATGATTTTACCGAAGTTAGCCGTACCGGTGCAGTTGAAACCATTATGGCACTGGC  
ACAGCAGCTGCGTCCGGATGTTATCTATTTTCCGAGCGTGGGTATGTTTCCGATGACCGTTG  
CACTGACCAATCTGCGTCTGGCACCGCTGCAGGTTATGGCCCTGGGTCATCCGGCAACCA  
CCCATAGCGATTATATTGATGCAGTTCTGGTGGAAAGAAGATTATCTGGGCGATATTGCATGCT  
TTAGCGAAAAAGTTGTGAGCCTGCCGAAAGATTGTCTGCCGTATGTTCCGCCTGCAAATATT  
ACCCAGCCGGAACCGATCCAGCAGTTTGTGCAGCGTGAAGCCGTTTCATATTGCCGTTTGTG  
CAAGCGCAATGAAAATCAATCCGCGTTTTCTGGCAGCCTGTGCAGAAATTGCACTGCGTAG  
TCCGCTGCCGATTATCTTTCATTTTCTGGTTGGTTTTTGTCTGGGGTATTACCCATCGTGTTAT  
GGAAAAAGCCGTTAATGAAATGGTTACCAGCGCCAAAGTTTATGAGCATCTGAACTATCAGA  
ACTATCTGCAGGTCATTAATCAGTGCGACCTGTTTATTAACCCGTTTCCGTTTGGTAATACCA  
ACGGTATTGTTGATACCGTTCGTCAGGGTCTGCCTGGTGTGTTGCTGAGCGGTGAAGAAGT  
TCACGAACATATTGATGAAGGTCTGTTTCGTCGTCTGGGTCTGGCAGAAGAACTGATTACCC  
ATAATGTTGAACAGTATATCACCGCAACCGTGCCTGCTGATTACCGATACCAATTGGCGTAATG  
GTCTGCGTCGTCAGCTGCTGCAGACCCAGCCTGATAATGTTCTGTTTACCGGCAAACCGGA  
ACAGTTTGGTCAGATTGTTTCGTGCCCTGCTGGATAATGGTCATCAGGATGTTAATGGATCCT  
GGAGCCATCCGCAGTTCGAAAAATAAgtcgaccggctgctaacaaagcccgaaaggaagctgagttggctgctgc  
caccgctgagcaataactagc**ataacccttggggcctctaaacgggtcttgaggggtttttgct**gaaag

**DNA sequence for 4glm7 in pET.BCS.NS plasmid context:**

gaaatt**taatac**gactcactataggggaattgtgagcggataacaattcccctctagagcagaattcggtagatctataaacaca  
cataaggaggacatATGCGCGGACTACCC**TGAATGAAACGTGACCC**GCGCGGGAGGAGAAC  
TGAAAAATAGTATTAGTGATTACACAGAGGCTGAGTTTGTTCAACTTCTTAAGGAAATTGAAA  
AAGAGGCGCGACTACCTGGTACGCCAACGTACGCGCGCGGGAGGAGTGTTAGATGTG  
TACTCGAACACTTTGTAATAAATACTGAGCATCCAGATGGAACGGATCTGATCTATTATCCT  
GCGCGACTACCTGGGACTATAATTTAACACGCGCGGGAGGACCCGAAGGGATTGTCAAG  
GAAATTAAGAATGGCGAGCTGCTAACGGTAAGCCAGGATTTAACAGGGCCGCGCGACTA

CCTACATGGGGAATATTTGCGCGCGGGAGGAGGATCCCATCACCATCATCACCATTAAgctg  
acgatccggctgctaacaagcccgaaggaagctgagttggctgctgccaccgctgagcaataactagc**ataacccttggggcc**  
**tctaaacgggtcttgaggggtttttgct**gaaag

**DNA sequence for GeneralistP1 in pET.BCS.NS plasmid context:**

gaaat**taatacgaactcactatagg**ggaattgtgagcggataacaattcccctctagagcagaattcggtagatctatataacaca  
cataaggaggacatATGCGCGCGACTACCATCTACGCGAATGTGACTTGCGGAGGACGA  
ACTGGAAAATAGTATTAGTGATTACACAGAGGCTGAGTTTGTTCACCTTCTTAAGGAAATTGA  
AAAAGAGAATGTTGCTGCAACTGATGATGTGTTAGATGTGTTACTCGAACACTTTGTAAAAAT  
TACTGAGCATCCAGATGGAACGGATCTGATCTATTATCCTAGTGATAATAGAGACGATAGCCC  
CGAAGGGATTGTCAAGGAAATTAAGAATGGCGAGCTGCTAACGGTAAGCCAGGATTTAAA  
CAGGGCGGATCCCATCACCATCATCACCATTAAgctgacgatccggctgctaacaagcccgaaggaagc  
tgagttggctgctgccaccgctgagcaataactagc**ataacccttggggcctctaaacgggtcttgaggggtttttgct**gaaag

**DNA sequence for GeneralistP2 in pET.BCS.NS plasmid context:**

gaaat**taatacgaactcactatagg**ggaattgtgagcggataacaattcccctctagagcagaattcggtagatctatataacaca  
cataaggaggacatATGGAAACTGGAAATAGTATTAGTGATTACACAGAGGCTGAGTTTGTTCAC  
TTCTTAAGGAAATTGAAAAAGAGCGCGCGACTACCATCTACGCGAATGTGACTTGTAAAATTACTGAGCATCCAGA  
AGGACGCGTGTTAGATGTGTTACTCGAACACTTTGTAAAAATTACTGAGCATCCAGATGGA  
CGGATCTGATCTATTATCCTAGTGATAATAGAGACGATAGCCCCGAAGGGATTGTCAAGGAAA  
TTAAAGAATGGCGAGCTGCTAACGGTAAGCCAGGATTTAAACAGGGCGGATCCCATCACCA  
TCATCACCATTAAgctgacgatccggctgctaacaagcccgaaggaagctgagttggctgctgccaccgctgagcaata  
actagc**ataacccttggggcctctaaacgggtcttgaggggtttttgct**gaaag

**DNA sequence for GeneralistP3 in pET.BCS.NS plasmid context:**

gaaat**taatacgaactcactatagg**ggaattgtgagcggataacaattcccctctagagcagaattcggtagatctatataacaca  
cataaggaggacatATGGAAACTGGAAATAGTATTAGTGATTACACAGAGGCTGAGTTTGTTCAC  
TTCTTAAGGAAATTGAAAAAGAGAATGTTGCTGCAACTGATGATGTGTTAGATGTGTTACTCG  
AACACTTTGTAAAAATTACTGAGCATCCAGATGGAACGGATCTGATCTATTATCCTCGCGCGA  
CTACCATCTACGCGAATGTGACTTGCGGAGGACGCCCCGAAGGGATTGTCAAGGAA  
TTAAAGAATGGCGAGCTGCTAACGGTAAGCCAGGATTTAAACAGGGCGGATCCCATCACCA  
TCATCACCATTAAgctgacgatccggctgctaacaagcccgaaggaagctgagttggctgctgccaccgctgagcaata  
actagc**ataacccttggggcctctaaacgggtcttgaggggtttttgct**gaaag

**DNA sequence for GeneralistP4 in pET.BCS.NS plasmid context:**

gaaat**taatacgaactcactatagg**ggaattgtgagcggataacaattcccctctagagcagaattcggtagatctatataacaca  
cataaggaggacatATGGAAACTGGAAATAGTATTAGTGATTACACAGAGGCTGAGTTTGTTCAC  
TTCTTAAGGAAATTGAAAAAGAGAATGTTGCTGCAACTGATGATGTGTTAGATGTGTTACTCG  
AACACTTTGTAAAAATTACTGAGCATCCAGATGGAACGGATCTGATCTATTATCCTAGTGATAA  
TAGAGACGATAGCCCCGAAGGGATTGTCAAGGAAATTAAGAATGGCGAGCTGCTAACGGT

AAGCCAGGATTTAAACAGGGCCGCGCGACTACCATCTACGCGAATGTGACACTTGCGGGA  
GGACGCGGATCCCATCACCATCATCACCATTAAgtcgacgatccggctgctaacaagcccgaaggaagct  
gagttggctgctgccaccgctgagcaataactagc**ataacccttggggcctctaaacgggtcttgaggggtttttgctgaaag**

**DNA sequence for SUMO-4glm7 in pET28a plasmid context:**

gaaat**taatac**gactcactataggggaattgtgagcggataacaattcccctctagaaataattttgttaactttaagaaggagatatac  
catATGGAGAAAAAATCCGTGGTTCTCACCACCACCACCACCACCATATGGCTAGCGGATCGGA  
CTCAGAAGTCAATCAAGAAGCTAAGCCAGAGGTCAAGCCAGAAGTCAAGCCTGAGACTCAC  
ATCAATTTAAAGGTGTCCGATGGATCTTCAGAGATCTTCTTCAAGATCAAAAAGACCACTCCG  
CTGCGTAGGCTGATGGAAGCGTTCGCTAAAAGACAGGGTAAGGAAATGGACTCCTTAAGAT  
TCTTGACGACGGTATTAGAATTCAAGCTGATCAGACCCCTGAAGATTTGGACATGGAGGAT  
AACGATATTATTGAGGCTCACAGAGAACAGATTGGTGGAGGATCCTCTGGAGGTGGATCGG  
GATCGGGCGGCGGCAGCGGTGGCGGCTCGGGCGGGATGCGCGCGACTACCT**GAATGA**  
**AAACGTGACC**C**GCGCGGGAGG**GAACTGGAAAATAGTATTAGTGATTACACAGAGGCTGA  
GTTTGTTCAACTTCTTAAGGAAATTGAAAAAGAG**C**GCGCGACTACCT**TGGTACGCCAACGTC**  
**ACGCGCGCGGGAGG**AGTGTTAGATGTGTTACTCGAACACTTTGTAAAATTACTGAGCATCC  
AGATGGAACGGATCTGATCTATTATCCT**C**GCGCGACTACCT**TGGACTATAATTTAACACGCG**  
**CGGGAGGACCCGAAGGGATTGTCAAGGAAATTAAGAATGGCGAGCTGCTAACGGTAAGC**  
**CAGGATTTAAACAGGGCC****C**GCGCGACTACCT**TACATGGGGAATATTT****C**GCGCGCGGGAGGAT  
AAgtcgacgatccggctgctaacaagcccgaaggaagctgagttggctgctgccaccgctgagcaataa**ctagc**ataacccttggggc  
**ctctaaacgggtcttgaggggtttttgctgaaag**

**DNA sequence for SUMO-2glm7 in pETBCS.NS plasmid context:**

gaaat**taatac**gactcactataggggaattgtgagcggataacaattcccctctagagcagaattcggtagatctatataacaca  
cataaggaggacatATGGAGAAAAAATCCGTGGTTCTCACCACCACCACCACCACCATATGGCTAGC  
GGATCGGACTCAGAAGTCAATCAAGAAGCTAAGCCAGAGGTCAAGCCAGAAGTCAAGCCT  
GAGACTCACATCAATTTAAAGGTGTCCGATGGATCTTCAGAGATCTTCTTCAAGATCAAAAAG  
ACCACTCCGCTGCGTAGGCTGATGGAAGCGTTCGCTAAAAGACAGGGTAAGGAAATGGACT  
CCTTAAGATTCTTGACGACGGTATTAGAATTCAAGCTGATCAGACCCCTGAAGATTTGGACA  
TGGAGGATAACGATATTATTGAGGCTCACAGAGAACAGATTGGTGGAGGATCCTCTGGAGG  
TGGATCGGGATCGGGCGGCGGCAGCGGTGGCGGCTCGGGCGGGATG**C**GCGCGACTAC**C**  
**TGGACTATAATTTAACAC****C**GCGCGGGAGGAGAACTGGAAAATAGTATTAGTGATTACACAGA  
GGCTGAGTTTGTTCAACTTCTTAAGGAAATTGAAAAAGAGAATGTTGCTGCAACTGATGATG  
TGTTAGATGTGTTACTCGAACACTTTGTAAAATTACTGAGCATCCAGATGGAACGGATCTGA  
TCTATTATCCTAGTGATAATAGAGACGATAGCCCCGAAGGGATTGTCAAGGAAATTAAGAAT  
GGCGAGCTGCTAACGGTAAGCCAGGATTTAAACAGGGCC**C**GCGCGACTAC**C****TACATGGGGA**  
**ATATTT****C**GCGCGCGGGAGGATAAgtcgacgatccggctgctaacaagcccgaaggaagctgagttggctgctgc  
caccgctgagcaataactagc**ataacccttggggcctctaaacgggtcttgaggggtttttgctgaaag**

**DNA sequence for SUMO-2gFc in pETBCS.NS plasmid context:**

gaaatt**taatac**gact**cactatagg**ggaattgtgagcggataacaattcccctctagagcagaattcggtagatctatataacaca  
cataaggaggacat**ATGGAGAAAAAATCCGTGGTTCTCACCACCACCACCACCATATGGCTAGC**  
**GGATCGGACTCAGAAGTCAATCAAGAAGCTAAGCCAGAGGTCAAGCCAGAAGTCAAGCCT**  
**GAGACTCACATCAATTTAAAGGTGTCCGATGGATCTTCAGAGATCTTCTTCAAGATCAAAAAG**  
**ACCACTCCGCTGCGTAGGCTGATGGAAGCGTTCGCTAAAAGACAGGGTAAGGAAATGGACT**  
**CCTAAGATTCTTGTACGACGGTATTAGAATTCAAGCTGATCAGACCCCTGAAGATTTGGACA**  
**TGGAGGATAACGATATTATTGAGGCTCACAGAGAACAGATTGGTGGAAATGGAACCGAAAAG**  
**CTGTGATAAAACCCATACCTGTCCGCCTTGTCCGGCACCAGGAACTGCTGGGTGGTCCGAG**  
**CGTTTTTCTGTTTCCGCCTAAACCGAAAGATACCCTGATGATTAGCCGTACACCGGAAGTTA**  
**CCTGTGTTGTTGTTGATGTTAGCCATGAAGATCCGGAAGTGAATTTAACTGGTATGTTGATG**  
**GTGTGGAAGTGCATAATGCAAAAACCAACCGCGTGAAGAACCGCGCGACTACCT**GGGACT****  
**ATAATTTAACACCGCGCGGGAGGAC**CGTGTTGTTAGCGTTCTGACCGTTCTGCATCAGGATTG  
GCTGAATGGTAAAGAATACAAATGCAAAGTGAGCAACAAAGCACTGCCTGCACCGATTGAA  
AAAACCATTAGCAAAGCAAAGGTCAGCCTCGTGAACCGCAGGTTTATACCCTGCCTCCGA  
GCCGTGATGAACTGACCAAAAATCAGGTTAGCCTGACCTGTCTGGTGAAGGTTTTTATCCG  
AGCGATATTGCAGTTGAATGGGAAAGCAATGGTCAGCCGGAAAATAACTATAAAACCAACCC  
TCCGGTTCTGGATAGTGATGGTAGCTTTTTTCTGTATAGCAAACCTGACCGTTGATAAAAGCC  
GTTGGCAGCAGGGTAATGTTTTTAGCTGTAGCGTTATGCATGAAGCCCTGCATAATCATTATA  
CCCAGAAAAGCCTGAGCCTGAGTCCGGGTAAAGGTAGCC**CGCGCGACTACCTACATGGGGA**  
**ATATTT**CGCGCGCGGGAGG****TTAAgtcgacgatccggctgctaacaagcccgaaggaagctgagttggctgctgc  
caccgctgagcaataactag**ataacccttggggcctctaaacgggtcttgaggggtttttgctg**aaag

**DNA sequence for PdST6Mut in pJL1 plasmid context:**

gaaatt**taatac**gact**cactatagg**gagaccacaacggtttccctctagaaataatttgtttaactttaagaaggagatatacatATGG  
AGAAAAAATCCATCACCATCATCACCATGGCGGATCCGGACTGGTTCCGCGTGGTAGCCA  
CATGTGTAATAGCGATAACACCAGCCTGAAAGAAACCGTTAGCAGCAATAGCGCAGATGTTG  
TTGAAACCGAAACCTATCAGCTGACCCCGATTGATGCACCGAGCAGCTTTCTGAGCCATAG  
CTGGGAACAGACCTGTGGCACCCCGATTCTGAATGAAAGCGATAAACAGGCAATCAGCTTT  
GATTTTGTGACCCGGAACCTGAAACAGGATGAGAAATATTGCTTTACCTTCAAAGGCATTACC  
GGTGATCATCGTTATATTACCAATACCACCCTGACCGTTGTGGCACCCGACCCTGGAAGTTTA  
TATTGATCATGCAAGCCTGCCGAGCCTGCAGCAGCTGATTCATATTATTCAGGCCAAAGATG  
AATATCCGAGCAATCAGCGTTTTTGTAGCTGGAAACGTGTTACCGTTGATGCAGATAATGCC  
AACAACTGAACATTCATACCTATCCGCTGAAAGGCAATAATACCAGTCCGGAAATGGTTGC  
AGCAATTGATGAATATGCACAGAGCAAAAATCGCCTGAACATCGAGTTTTATACCAATACATAT  
CACGTGTTTAATAACCTGCCTCCGATTATTCAGCCGCTGTATAATAACGAGAAAGTGAAAATT  
AGCCACATCAGCCTGTATGATGACGGTAGCTATGAATATGTTAGCCTGTATCAGTGGAAAGAT  
ACCCCGAACAAAATTGAAACACTGGAAGGTGAAGTTAGCCTGCTGGCAAATTATCTGGCAG  
GCACCTCACCGGATGCTCCGAAAGGTATGGGTAATCGTTATAATTGGCACAAACTGTATGAC



ACCGACTATTACTTTCTGCGCGAAGATTATCTGGATGTTGAAGCAAATCTGCATGATCTGCGT  
GATTACCTGGGTAGCAGTGCAAACAATGCCGTGGGATGAATTTGCAAACCTGAGCGATA  
GCCAGCAGACCCTGTTTCTGGATATTGTTGGTTTTGATAAAGAACAGCTGCAGCAACAGTAT  
AGCCAGAGTCCGCTGCCGAATTTTATCTTTACCGGCACCACCACCTGGGCAGGCGGTGAAA  
CCAAAGAATATTATGCCCAGCAGCAGGTTAACGTGATTAACAATGCAATTAATGAAACCAGCC  
CGTACTATCTGGGTAAAGATTATGACCTGTTTTTCAAAGGTCATCCTGCCGGTGGTGTGATTA  
ATGATATTATTCTGGGTAGCTTCCCGGATATGATTAACATTCCGGCAAAAATTAGCTTCGAGG  
TTCTGATGATGACCGATATGCTGCCGGATACCGTTGCAGGTATTGCAAGCAGTCTGTATTC  
ACAATTCCGGCAGATAAAGTGAACCTTCATTGTTTTTACCAGCAGCGATAACCATTACCGATCGT  
GAAGAAGCACTGAAAAGTCCGCTGGTTCAGGTTATGCTGACCCTGGGTATTGTTAAAGAAA  
AAGATGTTCTGTTTTGGGCATAAgtcgaccggctgctaacaagcccgaaggaagctgagttggctgctgccaccg  
ctgagcaataactagc**ataaccctggggcctctaaacgggtcttgaggggtttttgctgaaag**

**DNA sequence for NmLgtBTrunc in pET.BCS.NS plasmid context:**

gaaat**taatac**gactcactataggggaattgtgagcggataacaattcccctctagagcagaattcggtagatctatataacaca  
cataaggaggacatATGGAGAAAAAATCTCTGCGTGGAGCCATCCGCAGTTCGAAAAAGGTGGT  
GGTTCTGGTGGTGGTTCTGGTGGTTCTGCGTGGAGCCATCCGCAGTTCGAAAAAGGATCC  
CAGAACCATGTTATTAGCCTGGCAAGCGCAGCAGAACGTCGTGCACATATTGCAGATACCTT  
TGGTTCGTTCATGGTATTCCGTTTTTCTGATGCACTGATGCCGAGCGAACGTCTGGAAC  
AGGCAATGGCAGAACTGGTCCGGGTCTGAGCGCACATCCGTATCTGAGCGGTGTTGAAA  
AAGCATGTTTTATGAGCCATGCAGTTCTGTGGAACAGGCACTGGATGAAGGTCTGCCGTAT  
ATTACCGTTTTTGAAGATGATGTTCTGCTGGGTGAAGGTGCAGAAAAATTTCTGGCAGAAGA  
TGCCTGGCTGCAAGAACGTTTTGATCCGGATACCGCATTATTGTTTCGTCTGGAAACCATGT  
TTATGCATGTTCTGACCAGCCCGAGCGGTGTGGCAGATTATTGTGGTTCGTGCATTTCCGCT  
GCTGGAAAGCGAACATTGGGGCACCGCAGGTTATATCATTAGCCGTAAGCAATGCCGTTTT  
TTCTGGATCGTTTTGCAGCACTGCCTCCGGAAGGCCTGCATCCGGTTGATCTGATGATGTTT  
AGCGATTTTTTTGATCGTGAAGGTATGCCGTTTGTGAGCTGAATCCGGCACTGTGTGCACA  
AGAACTGCACTATGCAAAATTTTATGATCAGAATAGCGCACTGGGTAGCCTGATTGAACATG  
ATCGTCTGCTGAATCGTAAACAGCAGCGTCGTGATAGTCCGGCAAATACCTTTAAACATCGT  
CTGATTCGTGCCCTGACCAAATAGCCGTGAAGtcgacgatccggctgctaacaagcccgaaggaagct  
gagttggctgctgccaccgctgagcaataactagc**ataaccctggggcctctaaacgggtcttgaggggtttttgctgaaag**

**DNA sequence for HiNGT in pET.BCS.NS plasmid context:**

gaaat**taatac**gactcactataggggaattgtgagcggataacaattcccctctagagcagaattcggtagatctatataacaca  
cataaggaggacatATGACCAAAGAGAACCTGCAGAGCGTTCGCAGAAATACCACCGCAAGCCT  
GGTTGAAAGCAATAATGATCAGACCAGCCTGCAGATTCTGAAACAGCCTCCGAAACCGAAT  
CTGCTGCGTCTGGAACAGCATGTTGCAAAAAAAGATTATGAACTGGCATGCCGTGAACTGAT  
GGCAATTCTGGAAAAAATGGATGCCAATTTTGGTGGCGTGCACGATATTGAATTTGATGCAC  
CGGCACAGCTGGCATATCTGCCGAAAAACTGCTGATTCATTTTGAACCCGTCTGGCAAA  
TGCAATTACCACCCTGTTTAGCGATCCGGAACTGGCAATTAGCGAAGAGGGTGCCTGAAA

ATGATTAGCCTGCAGCGTTGGCTGACCCTGATTTTTGCAAGCAGCCCGTATGTTAATGCAGA  
TCATATCCTGAACAAATACAACATCAATCCGGATAGCGAAGGTGGTTTTTCATCTGGCAACCG  
ATAATAGCAGCATTGCCAAATTTTGCATCTTTTATCTGCCTGAGAGCAACGTTAATATGAGCCT  
GGATGCACTGTGGGCAGGTAATCAGCAGCTGTGTGCAAGCCTGTGTTTTGCACTGCAGAG  
CAGCCGTTTTATTGGCACCGCCAGCGCATTTCATAAACGTGCAGTTGTTCTGCAGTGGTTTC  
CGAAAAAACTGGCAGAAATTGCAAATCTGGATGAACTGCCTGCAAACATTCTGCATGATGTT  
TATATGCATTGCAGCTATGATCTGGCCAAAAACAAACATGATGTTAAACGTCCGCTGAATGAA  
CTGGTGCGTAAACATATTCTGACCCAGGGTTGGCAGGATCGTTATCTGTATACCCTGGGTAA  
AAAAGATGGTAAACCGGTTATGATGGTTCTGCTGGAACATTTTAAACAGCGGTATAGCATTTA  
TCGTACCCATAGCACCAGCATGATTGCAGCACGTGAAAAATTCTATCTGGTTGGTCTGGGTC  
ATGAAGGCGTTGATAATATTGGTCGTGAAGTGTTTGATGAGTTCTTTGAGATTAGCAGCAACA  
ACATTATGGAACGCCTGTTTTTTATCCGCAAACAGTGTGAAACCTTTACAGCCTGCCGTGTTT  
TATATGCCGAGCATTGGTATGGATATCACCACCATTTTTGTTAGCAATACACGTCTGGCACCG  
ATTCAGGCAGTTGCACTGGGTATCCGGCAACCACCCATAGCGAATTTATTGATTATGTGAT  
CGTCGAGGATGATTACGTTGGTAGCGAAGATTGTTTTAGCGAAACCCTGCTGCGCCTGCCG  
AAAGATGCACTGCCGTATGTTCCGAGCGCACTGGCACCGCAGAAAGTGGATTATGTTCTGC  
GTGAAAATCCGGAAGTTGTGAATATTGGTATTGCAGCAACCACCATGAACTGAATCCGGAA  
TTTTCTGCTGACACTGCAAGAAATTCGTGATAAAGCCAAAGTGAAAATTCACCTCCATTTTGC  
CTGGGTCAGTCAACCGGTCTGACCCATCCGTATGTGAAATGGTTTATTGAAAGCTATCTGGG  
TGATGATGCAACCGCACATCCGCATGCACCGTATCATGATTATCTGGCCATTCTGCGCGATT  
GTGATATGCTGCTGAATCCGTTTCCGTTTGGTAATACCAATGGCATTATTGATATGGTTACCCT  
GGGCCTGGTTGGTGTGTTGTAACCGGTGATGAAGTGCATGAACATATTGATGAAGGTCTGT  
TTAAACGTCTGGGCCTGCCGGAATGGCTGATTGCAGATACCCGTGAAACCTATATTGAATGT  
GCACTGCGCCTGGCGGAAAATCATCAAGAACGCCTGGAACCTGCGTCGTTATATCATTGAAA  
ATAATGGCCTGCAGAACTGTTTACCGGTGATCCGCGTCCGCTGGGCAAATTTCTGCTGAA  
AAAAACCAATGAGTGAAACGCAAACATCTGAGCAAAAAAGGATCCTCTGCGTGGAGCCAT  
CCGCAGTTCGAAAAATAAgtcgacgatccggctgctaacaagcccgaaggaagctgagttggctgctgccaccgctg  
agcaataactagc**ataacccttggggcctctaaacgggtcttgaggggtttttgct**gaaag

**DNA sequence for EcNGT in pET.BCS.NS plasmid context:**

gaaat**taatacgcactcactatagg**ggaattgtgagcggataacaattccccctagagcagaattcggtagatctatataacaca  
cataaggaggacatATGAGCCACAAAACCGATACCGCACCGGTTCAAGAACAGGCAGGCCTGAC  
CTTTCGTCTGAAACCTTTGAATGGCAGGTTTATCAGGGTCTGAATGAAGAAGCAGCACGT  
AGCCTGATTAGCCTGCTGCAGCTGCTGGATCGTCATTATGCACAGTGGGGTGAAGCTTTA  
GCGCATGGGCACCGGGTATGACCGCAGAAGAAATTAATCCGCATCTGTGTACCCGATTGCG  
CGGTGCAATTACCGCACTGTTTAGCCGTCCGGGTTTTCTGTTAGTGATGGTGGTTTTGCA  
GAACTGATGGATTATCATCGTTGGCTGGCAATTATCTTTGCCGTTAGCGATTATCGTCATGGC  
GATCATATTATTCGCAATATTAACGCAGCCGGTGGTGGTGTGTTGTTGCACCGCTGACCCTGAA  
TGCCGATAATCTGCAGCTGTTTTGTCTGAGCTATTATCCGGATTCACAGATTGCACTGCAGC

CGGAACCGCTGTGGCAGTATGATCGTCAGACCGTTGTTCTGCTGTTTTTGC ACTGCTGAG  
CGGTCTGCTGACTGCCGACACCGGCAGCACATCAGAAACGTGAACATCTGCTGGCATGGCT  
GCCGGAACGTCTGAAAGAAATTGATAGCCTGGAATTTCTGCCTGGTAAAGTTCTGCATGATG  
TGTATATGCATTGTAGCTATGCCGATCTGCCGAAAAACATCGTATTAACAAGAAATCAATC  
GTCTGACCGCACGTGCACTGGAACAGACCTATGCAGATTGTCTGCCGGTTCGTGCACCGG  
AAGCAGCCCGTCAGAAACCGGTTCTGGCAGTTGTTCTGGAATGGTTTACCTGTCAGCATAG  
CATTATCGTACCCATAGCACCAGCATGCGTGCCCTGCGTGAACATTTTCATCTGCTGGGTA  
TTGCACAGCCTGGTGCAACCGATGAAATTACCGGTGAAGTTTTTGATGAATTCGTGAACTG  
AGCGCAGAAAATGTTGTTGGTGATGCAATTCGTTGCCTGAGCGAAGTTCGTCCGGATGTTAT  
CTATTATCCTAGCGTTGGTATGTTTCCGCTGACCGTTTATCTGACAGCACTGCGTCTGGCAC  
CACTGCAGCTGATGGCACTGGGTCATCCGGCAACCACCTGGTCAGAACATATTGATGGTGT  
TCTGGTTGAAGAAGATTATCTGGGCGATCCGGCATGTTTAGCGAAACCGTTTGTGCAGTTC  
CGAAAGATGCCATTCGTTATATTCCGCCTGCAAGCACCGAACGTGTTCTGCCTGAACGTAC  
CCCGTTTTCGTGATCGTGCAAAAGCAGCATGGCCTGCAGCACTGCCGGTGCCTGTTGCAGT  
TTGTGCAAGCGTTATGAAAATTAACCCTGGTTTTCTGGATACCCTGCGCGAAATTAGCGATC  
GTAGCCGTGTTCCGGTTCAGTTTTGTTTTGGATGGGTTTTGCCAGGGCCTGACCCTGGA  
TTATCTGCGTCGTGCCATTCGTCAGGCGCTGCCGACAGCCGAAGTTAATGCACACATGCCG  
GTTCAGGCATATCAGCAGGCACTGAATAGCTGTGAACTGTTTGTTAATCCGTTTCCGTTTGG  
TAATACCAATGGTCTGGTTGATACCCTTCGCCAGGGTCTGCCAGGTGTTTGTATGACCGGTC  
CGGAAGTTCATACCCATATCGATGAAGGTCTGTTTCGTCTGCTGGGCCTGCCGGAAGCACT  
GATTGCACGTGATCGCGAAGAATATATCACCGCAGTTCTGAGCCTGACCGAAACACCGCGT  
CTGCGCGAACGTCTGCAGAAATATCTGACGGAAAATGATGTTGAGAAAGTGCTGTTTGAAG  
GCCGTCCGGATAAATTTGCGGAACGTGTTTGGCAGCTGTGGGAAGCCCGTAGCCATCGTC  
AAGAAGAAGGCGCAGAAGGATCCTCTGCGTGGAGCCATCCGCAGTTCGAAAAAGGTGGTG  
GTTCTGGTGGTGGTTCTGGTGGTTCTGCGTGGAGCCATCCGCAGTTCGAAAAATAAgtcgacg  
atccggctgctaacaagcccgaaggaagctgagttggctgctgccaccgctgagcaataactagc**ataacccttggggcctcta**  
**aacgggtcttgaggggtttttgctgaaag**

**DNA sequence for ApNGT in pET.BCS.NS plasmid context:**

gaaat**taatacgaactcactataggg**gaattgtgagcggataacaattcccctctagagcagaattcggtagatctatataacaca  
cataaggaggacatATGGAAAACGAGAATAAACCGAACGTGGCAAATTTTGAAGCAGCAGTTGCA  
GCCAAAGATTATGAAAAAGCATGTAGCGAGCTGCTGCTGATTCTGAGCCAGCTGGATAGCA  
ATTTTGGTGGCATTTCATGAAATCGAGTTCGAGTACCCAGCTCAGCTGCAGGATCTGGAGCA  
GGAAAAAATTGTGTACTTTTGCACCCGTATGGCGACTGCCATCACACCCTGTTCTCTGACC  
CGGTTCTGGAAATCTCCGACCTGGGTGTGCAGCGTTTCCCTGGTTTATCAGCGTTGGCTGGC  
GCTGATCTTCGCTAGCAGCCCGTTCGTGAACGCAGACCACATCCTGCAGACTTACAACCGT  
GAACCGAACCGCAAAAACCTCCCTGGAAATTCACCTGGACTCTAGCAAGTCCTCTCTGATTAA  
ATTTTGCATCCTGTACCTGCCGGAATCTAATGTGAACCTGAATCTGGATGTGATGTGGAACAT  
TTCCCCGGAGCTGTGTGCCTCTCTGTGCTTTGCGCTGCAAAGCCCGCGTTTTTGTGGCAC  
CAGCACCGCCTTTAACAAACGCGCGACCATTCTGCAGTGGTTCCCGCGTCATCTGGACCA

GCTGAAAAACCTGAACAACATCCCGTCCGCTATCTCTCATGACGTGTATATGCACTGTTCTTA  
CGACACCAGCGTTAACAAGCACGATGTTAAGCGCGCGCTGAATCACGTGATTCGTGCGCCAC  
ATCGAATCCGAATACGTTGGAAAGATCGTGATGTGGCTCACATCGGTTATCGCAACAACAA  
ACCGGTTATGGTCGTTCTGCTGGAACATTTTCATAGCGCGCACTCTATCTACCGTACTCACT  
CTACCAGCATGATCGCCGCGCGCAACACTTCTATCTGATCGGCCTGGGTTCCCCGAGCGT  
TGACCAGGCCGGTCAGGAGGTTTTTCGATGAATTCCACCTGGTAGCGGGTGACAACATGAA  
GCAAAAACCTGGAATTCATTCGTTCTGTGTGCGAAAGCAATGGTGCGGCAATTTTCTACATGC  
CGAGCATCGGTATGGATATGACCACCATCTTCGCGTCCAATACCGTCTGGCGCCGATTCA  
GGCAATCGCCCTGGGCCACCCGGCGACTACTCACTCCGACTTCATTGAATACGTTATCGTG  
GAAGACGACTACGTCGGCTCTGAGGAATGCTTCTCTGAAACCCTGCTGCGTCTGCCGAAA  
GACGCTCTGCCGTATGTTCCGTCCGCCCTGGCTCCGGAGAAAGTTGATTACCTGCTGCGTG  
AAAACCCTGAAGTTGTCAACATCGGTATTGCCTCTACCACTATGAAGCTGAACCCGTACTION  
CTGGAAGCACTGAAGGCCATTTCGTGACCGTGCGAAGGTGAAAGTGCACCTCCACTTCGCA  
CTGGGCCAGTCCAATGGTATCACTCACCCCTTACGTTGAACGCTTTATCAAATCTTACCTGGG  
CGACAGCGCTACCGCGCACCCGCACTCTCCGTACCACCACTACCTGCGTATTCTGCACAAC  
TGCGATATGATGGTAAACCCTTTTCCGTTTGGTAATACCAATGGTATTATTGACATGGTAACCC  
TGGGTCTGGTAGGTGTTTGCAAACCGGTGCGGAAGTCCACGAACATATCGATGAAGGCCT  
GTTCAAACGTCTGGGCCTGCCGGAATGGCTGATTGCAAACACCGTGGACGAATACGTGGA  
ACGTGCAGTGCGCCTGGCCGAGAACCATCAGGAACGTCTGGAACCTGCGTCGTTACATTATT  
GAAAACAATGGCCTGAACACCCTGTTACCGGCGACCCACGCCCGATGGGTCAGGTGTTT  
CTGGAAAACTGAACGCATTCTGAAGGAAAACGGATCCTCTGCGTGGAGCCATCCGCAGT  
TCGAAAAAGTGGTGGTTCTGGTGGTGGTTCTGGTGGTCTGCGTGGAGCCATCCGCAGT  
TCGAAAAATAAgtcgacgatccggctgctaacaagccccgaaaggaagctgagttggctgctgccaccgctgagcaataact  
agc**ataacccttggggcctctaaacgggtcttgaggggtttttgct**gaaag

**DNA sequence for ApNGT Q469A in pET.BCS.NS plasmid context:**

gaaat**taatacgaactcactatagg**ggaattgtgagcggataacaattccccctagagcagaattcggtagatctataaacaca  
cataaggaggacatATGGAACGAGATAAACCGAACGTGGCAAATTTTGAAGCAGCAGTTGCA  
GCCAAAGATTATGAAAAAGCATGTAGCGAGCTGCTGCTGATTCTGAGCCAGCTGGATAGCA  
ATTTTGGTGGCATTTCATGAAATCGAGTTCGAGTACCCAGCTCAGCTGCAGGATCTGGAGCA  
GGAAAAAATTGTGTACTTTTGCACCCGTATGGCGACTGCCATCACACCCTGTTCTCTGACC  
CGGTTCTGGAAATCTCCGACCTGGGTGTGCAGCGTTTCTGTTTATCAGCGTTGGCTGGC  
GCTGATCTTCGCTAGCAGCCCGTTCGTGAACGCAGACCACATCCTGCAGACTTACAACCGT  
GAACCGAACCGCAAAAACCTCCCTGGAAATTCACCTGGACTCTAGCAAGTCCTCTCTGATTAA  
ATTTTGCATCCTGTACCTGCCGGAATCTAATGTGAACCTGAATCTGGATGTGATGTGGAACAT  
TTCCCCGGAGCTGTGTGCCTCTCTGTGCTTTGCGCTGCAAAGCCCGCGTTTTTGTGGCAC  
CAGCACCGCCTTTAACAAACGCGCGACCATTCTGCAGTGGTTCCCGCGTCATCTGGACCA  
GCTGAAAAACCTGAACAACATCCCGTCCGCTATCTCTCATGACGTGTATATGCACTGTTCTTA  
CGACACCAGCGTTAACAAGCACGATGTTAAGCGCGCGCTGAATCACGTGATTCGTGCGCCAC  
ATCGAATCCGAATACGTTGGAAAGATCGTGATGTGGCTCACATCGGTTATCGCAACAACAA

ACCGGTTATGGTCGTTCTGCTGGAACATTTTCATAGCGCGCACTCTATCTACCGTACTCACT  
CTACCAGCATGATCGCCGCGCGCAACACTTCTATCTGATCGGCCTGGGTTCCCGGAGCGT  
TGACCAGGCCGGTCAGGAGGTTTTTCGATGAATTCCACCTGGTAGCGGGTGACAACATGAA  
GCAAAAACCTGGAATTCATTCGTTCTGTGTGCGAAAGCAATGGTGC GGCAATTTTCTACATGC  
CGAGCATCGGTATGGATATGACCACCATCTTCGCGTCCAATACCCGTCTGGCGCCGATTCA  
GGCAATCGCCCTGGGCCACCCGGCGACTACTCACTCCGACTTCATTGAATACGTTATCGTG  
GAAGACGACTACGTCGGCTCTGAGGAATGCTTCTCTGAAACCCTGCTGCGTCTGCCGAAA  
GACGCTCTGCCGTATGTTCCGTCCGCCCTGGCTCCGGAGAAAGTTGATTACCTGCTGCGTG  
AAAACCCTGAAGTTGTCAACATCGGTATTGCCTCTACCACTATGAAGCTGAACCCGTACTTC  
CTGGAAGCACTGAAGGCCATTTCGTGACCGTGCGAAGGTGAAAGTGC ACTTCCACTTCGCA  
CTGGGCGCGTCCAATGGTATCACTCACCTTACGTTGAACGCTTTATCAAATCTTACCTGGG  
CGACAGCGCTACCGCGCACCCGCACTCTCCGTACCACCAGTACCTGCGTATTCTGCACAAC  
TGCGATATGATGGTAAACCCTTTTCCGTTTGGTAATACCAATGGTATTATTGACATGGTAACCC  
TGGGTCTGGTAGGTGTTTGCAAACCGGTGCGGAAGTCCACGAACATATCGATGAAGGCCT  
GTTCAAACGTCTGGGCCTGCCGGAATGGCTGATTGCAAACACCGTGGACGAATACGTGGA  
ACGTGCAGTGC GCCTGGCCGAGAACCATCAGGAACGTCTGGA ACTGCGTCGTTACATTATT  
GAAACAATGGCCTGAACACCCTGTTACCGGCGACCCACGCCCGATGGGTGAGGTGTTT  
CTGGAAAACTGAACGCATTTCCTGAAGGAAAACGGATCCTCTGCGTGGAGCCATCCGCAGT  
TCGAAAAATAAgtcgacgatccggctgctaacaagccccgaaaggaagctgagttggctgctgccaccgctgagcaataact  
agc**ataacccttggggcctctaaacgggtcttgaggggtttttgct**gaaag

**DNA sequence for EndoA WT in pGEX/T2 plasmid context:** (*ITALICS* indicates GST-Tag)

gtt**gacaattaatcatcggctcgtataatgt**gtggaattgtgagcggataacaatttcacacaggaaacagtattc**ATGTCCCCTA**  
*TACTAGGTTATTGGAAAATTAAGGGCCTTGTC AACCCACTCGACTTCTTTT*GGAATATCTTG  
*AAGAAAAATATGAAGAGCATTGTATGAGCGCGATGAAGGTGATAAATGGCGAAACAAAAAG*  
*TTTGAATTGGGTTTGGAGTTTCCCAATCTTCTTATTATATTGATGGTGATGTTAAATTAACAC*  
*AGTCTATGGCCATCATACTTATATAGCTGACAAGCACAAACATGTTGGGTGGTTGTCCAAAA*  
*GAGCGTGCAGAGATTTCAATGCTTGAAGGAGCGGTTTTGGATATTAGATACGGTGTTCGAG*  
*AATTGCATATAGTAAAGACTTTGAAACTCTCAAAGTTGATTTTCTTAGCAAGCTACCTGAAATG*  
*CTGAAAATGTTCGAAGATCGTTTATGTCATAAAACATATTTAAATGGTGATCATGTAACCCATC*  
*CTGACTTCATGTTGATGACGCTCTTGATGTTGTTTTATACATGGACCCAATGTGCCTGGATG*  
*CGTTCCCAAATTAGTTTGTTTTAAAAACGTATTGAAGCTATCCACAAATTGATAAGTACTT*  
*GAAATCCAGCAAGTATATAGCATGGCCTTTCAGGGCTGGCAAGCCACGTTTGGTGGTGGC*  
*GACCATCCTCCAAAATCGGATCTGGTTCCGCGTGGATCCTCTACGTACAACGGCCCGCTGT*  
*CCTCCATTGGTTTCCAGAGGAACTTGCCCAATGGGAACCAGACAGTGATCCAGACGCACC*  
*CTTTAACAGAAGCCATGTTCCGCTGGAACCAGGCCGCGTTGCGAATAGGGTAAATGCTAAT*  
*GCAGACAAGGACGCACACCTTGTTCGTTGTCCGCGCTAAACAGGCATACATCAGGTGTTT*  
*CATCGCAAGGAGCGCCAGTTTTCTATGAAAATACGTTACAGCTATTGGCATTATACAGATTTGA*  
*TGGTTTATTGGGCTGGTTCAGCTGGCGAAGGCATTATCGTTCCGCCAAGTGCCGATGTCATT*  
*GATGCATCGCACCGAAATGGGGTGCCGATTTTAGGAAATGTGTTCTTCCCGCCGACGGTTT*

ATGGAGGGCAGCTAGAGTGGCTAGAACAAATGTTAGAGCAAGAGGAGGACGGTTCATTCCC  
CCTTGCTGACAAATTGCTAGAAGTCGCAGACTATTATGGGTTTGACGGCTGGTTTATTAACC  
AAGAAACAGAAGGGGCAGACGAAGGAACAGCCGAAGCCATGCAAGCTTTTCTCGTTTATTT  
GCAGGAACAAAAGCCAGAAGGCATGCACATCATGTGGTATGACTCGATGATTGATACAGGG  
GCGATCGCCTGGCAAAACCATTTAACGGATCGAAATAAAATGTACTTGCAAAATGGCTCGAC  
CCGCGTCGCTGACAGCATGTTTTTGAACTTTTGGTGGCGTGACCAGCGCCAATCGAACGAA  
TTGGCACAAGCACTTGGCAGGTCTCCGTATGACCTCTATGCCGGAGTGGATGTGGAAGCAC  
GAGGGACAAGTACCCCTGTTTCAGTGGGAAGGCCTGTTTCCTGAAGGAGAAAAGGCGCATA  
CATCACTCGGGTTATACCGTCCAGATTGGGCATTTTCAGTCAAGTGAAACAATGGAAGCGTTT  
TATGAAAAAGAACTACAATTTTTGGGTTGGCTCGACAGGAAATCCAGCCGAAACAGACGGCC  
AGTCAAATTGGCCTGGCATGGCGCACTGGTTTCCCGCGAAAAGCACCGCTACTTCGGTACC  
CTTTGTGACTCACTTTAATACGGGCAGCGGCGCTCAGTTTTTCGGCAGAAGGCAAAACTGTG  
TCGGAACAGGAATGGAATAACCGCAGCCTTCAAGATGTGCTGCCGACATGGCGCTGGATTC  
AGCATGGCGGCGATTTAGAGGCAACATTTTCTTGGGAAGAAGCGTTTGAAGGGGGAAGCTC  
GTTACAATGGCATGGCTCATTAGCGGAAGGAGAACACGCCCAAATCGAGCTCTATCAAACA  
GAGTTGCCGATAAGCGAAGGCACTTCGCTAACGTGGACATTTAAAAGCGAGCACGGCAACG  
ATTTAAATGTGGGCTTCCGTTTAGATGGGGAAGAGGACTTCCGTTATGTGGAAGGAGAACA  
GCGTGAATCGATAAATGGTTGGACGCAGTGGACGTTGCCGCTGGATGCGTTTGCTGGTCA  
GACGATAACAGGGCTGGCATTTCAGCGGAAGGGAATGAGACTGGGCTGGCAGAATTCTAT  
ATTGGACAACCTGGCCGTAGGTGCTGATAGCGAAAAGCCTGCCGCTCCAAACGTGAACGTAC  
GCCAGTACGACCCAGACCCGAGTGGCATTTCAGCTCGTATGGGAAAAACAAAGCAACGTCC  
ACCATTACCGCGTTTATAAAGAAACAAAGCACGGCAAAGAGCTAATTGGCACATCTGCTGGA  
GATCGAATTTACCTAGAAGGCCTAGTCGAGGAAAGCAAACAAAACGACGTGCGTCTGCATAT  
AGAAGCACTAAGTGAAACATTTGTGCCAAGTGATGCTCGCATGATCGACATAAAAAGCGGCT  
CGTTTTAGgggaattcatcgtgactgactgacgatctgcctcgcgctttcgggtgatgacggtgaaaacctctgacacatgcagct  
cccgagacgggtcacagcttgtctgt

**DNA sequence for EndoCC1 N180H in pET41b plasmid context:**

gaaatt**aaatac**gact**cactatagg**ggaattgtgagcggataacaattccccctagaaataatTTgtttaactttaagaaggagatatac  
atATGCACCATCACCACCACCATATGCCTATCGCTGGGAAGAAGTTCCACCCCCGGGCTCTG  
CCTGAGTTCTGGAGGACGTTCCGGGAGATGGACGAATGGCGGGCCACTCAGACTGGACCT  
CAGGCTCGTCCGGCTGAAGGCATTCTCAAGTACGTTCCACGGAAGATTCCGGCCTGCTGATA  
TCGCAGGGAAAGGTCGACTGTTGGTTTCTCATGACTACAAGGGAGGCTACGTCGAAGATCC  
CTTTTCCAAGTCGTATAGCTTCAATTGGTGGTTCTCGACGGATAGCTTCAACTACTTCGCTCA  
CCACCGGATAACCATTCCCCCTCCGGAATGGATAAACGCTGCTCATCGCCAGGGTGTACCT  
ATTCTCGGCACCATCATCTTCGAAGGTGGAAGCGACGAAGACATCCTCCGGATGGTGTACG  
GAAAACACCAGGAAGCACCAAGCAACTTCCACGCCGAACGAAACGCGGAGTACACCGTAC  
CAGTTTCGTCTACTACGCAGAACTCTTCGCAGACCTGGCTGTGAGCGTGGATTCGATGG  
TTGGCTGCTCCACGTTGAGATTGGTCTGCAGGGAGGATCAGAGCAAGCACGAGGTCTGGC  
TGCTTGGGTTGCGCTACTGCAGCAGGAGGTTTTGAAGAAGGTTGGCCACATGGCTTGGT

CATTTGGTACGACAGTGTCACTGTCCGTGGGGACCTGTGGTGGCAAGACAGGCTGAACGC  
TTTCAACTTGCCGTTCTTCTTGAATTCTTCGGGAATTTTCACAAACTATTGGTGGTACAACGA  
TGCACCTCAGAAACAAATCGACTTCCTTTTCGAGGGTTGACCCGAATCTCACCGGGCAAACC  
GCTGAGCCGCATCAATACAACCTGCAGAAGACGATTCAAGATATCTATATCGGTGTGGATGT  
CTGGGGACGCGGTTTCGCATGGTGGAGGAGGATTTGGTGCCTACAAAGCTATTGAGCACGC  
AGACCCGAAAGGACTCGGGTTTAGCGTTGCCCTCTTCGCTCAAGGATGGACCTGGGAAAC  
CGAGGAGGAGAAACCAGGCTGGAACCTGGGCACAGTTCTGGGACTACGACTCTAAACTCTG  
GGTTGGACCTCCCGGAGTTGTTCGAGGCACCTGACCATACCGTCAAACCTGGCGAATACCC  
CTGCGTTCACGGACCCTTCCAACCCATCTCCAGCTTCTTCCTGACATATCCACCTCCCGAC  
CCGCTAGACCTGCCATTCTACACCAACTTCTGCCCCGGTATCGGAGATGCGTGGTTTCGTTG  
AGGGCAAGGAGGTCTTCCGCTCCGAGACGGGTTGGACAGACATGGACAAGCAGACCACG  
GTTGGCGACTTGGTCTGGCCCCGACCCAAGATTTATGATCTTCCATCTCAAATGCCAGTCA  
GGCTACGTTAAATGCGGCATTCAACTTTAACGATGCGTGGAAATGGAGGAAACTCGCTTCA  
TCAACCTCACCGTCCCTGGAGGAGCGACCACGTATGGAGCCTACTGGGTTCCCATCCAGA  
CATTACATTCTCCAGTCGGCGCCAGTACGAAGCTTCGATCGTCTACAAGCCGGGGTTGAG  
TGGGAAGACCCGCTTCGATGCCAAGTACGAGGTGGGTATCCGAACCATCACAGGGGAAGA  
CCAAGGCAAGATCATCTCCAACACGACGACGGAAGTTGAAACGGTTGGCGCAAGGTGCA  
CATTTTGTTCGAGATCGAGACGCCAGTTGAAGGAGGGTCCATCATCGTACCTTCATCCATCG  
GCCTGGTCATTGCAGTTTTCGAACGTATCAACTACCGAGCAATTCGAGTTCCCTTCTGCTC  
GGCCAGATTACCATCCACCCCCACCTCCCGATCGTTACAAGGAGTTCAAGCCGGCCCTCC  
TGTGGCTTTTGTTCACACCTTCCGCTGGAACCTAATAGCCTCGATGGCACCCCTCACTTGGGA  
CGTCGTGCGAGCCATTGAACGCCCTCCACCAGTCGAAATTAACAACCCCGATGACGCACAA  
ATCCCCTGGAACCTGCAGCCGACCAACAAGAATGGTTCCCGACTTCTCTACTTCAATG  
TGTACGTGCTGGAGCTCTTGGATGGTGGTGGACAAGGTCCTCCACAGTGGATTGGCACGA  
CTGGATACGATGGGGAGAAAAAGAGGTTCTTCATCTATGACGAAAGCTTGCCACCGACGTC  
CGGTTTAAGGAGGTTACGTTCCAGATCGAGGGCGTCCTGGAGACGGGAGAGTCAACGCA  
CTGGTACGATGCACCGGCTGCGCCGTGGCAACGGCGGGAGGAGAGCAGAAGCGGACAC  
GACGCACCTCTCTCAAGTCCGTGCTCAGTCCGTTGCGGAGGAAGAAGTCGAAGGGCGATA  
TCTCCGTGCGCAAGTGAgaattctgtacaggccttggcgcgcctgcaggcgagctccgtcgacaagcttgcggccgact  
cgagcaccaccaccaccaccaccactaattgattaatacctaggctgctaaacaagcccgaaggaagctgagttggctgct  
gccaccgctgagcaataactagc**ataacccttggggcctctaaacgggtcttgaggggtttttgct**gaaaggaggaactatatccgg  
at

### Supplementary Information References:

1. Lombard, V.; Golaconda Ramulu, H.; Drula, E.; Coutinho, P. M.; Henrissat, B., The carbohydrate-active enzymes database (cazy) in 2013. *Nucleic Acids Res.* **2014**, *42* (D1), D490-495.
2. Katoh, K.; Standley, D. M., Mafft multiple sequence alignment software version 7: Improvements in performance and usability. *Mol. Biol. Evol.* **2013**, *30* (4), 772-780.
3. Price, M. N.; Dehal, P. S.; Arkin, A. P., Fasttree 2--approximately maximum-likelihood trees for large alignments. *PLOS ONE* **2010**, *5* (3), e9490.
4. Stamatakis, A., Raxml version 8: A tool for phylogenetic analysis and post-analysis of large phylogenies. *Bioinformatics* **2014**, *30* (9), 1312-1313.
5. Letunic, I.; Bork, P., Interactive tree of life (itol) v3: An online tool for the display and annotation of phylogenetic and other trees. *Nucleic Acids Res.* **2016**, *44* (W1), W242-245.
6. Kightlinger, W.; Lin, L.; Rosztochy, M.; Li, W.; DeLisa, M. P.; Mrksich, M.; Jewett, M. C., Design of glycosylation sites by rapid synthesis and analysis of glycosyltransferases. *Nat. Chem. Biol.* **2018**, *14* (6), 627-635.
7. Gibson, D. G.; Young, L.; Chuang, R.-Y.; Venter, J. C.; Hutchison, C. A.; Smith, H. O., Enzymatic assembly of DNA molecules up to several hundred kilobases. *Nat. Methods* **2009**, *6* (5), 343-345.
8. Jewett, M. C.; Swartz, J. R., Mimicking the escherichia coli cytoplasmic environment activates long-lived and efficient cell-free protein synthesis. *Biotechnol. Bioeng.* **2004**, *86* (1), 19-26.
9. Martin, R. W.; Des Soye, B. J.; Kwon, Y.-C.; Kay, J.; Davis, R. G.; Thomas, P. M.; Majewska, N. I.; Chen, C. X.; Marcum, R. D.; Weiss, M. G.; Stoddart, A. E.; Amiram, M.; Ranji Charna, A. K.; Patel, J. R.; Isaacs, F. J.; Kelleher, N. L.; Hong, S. H.; Jewett, M. C., Cell-free protein synthesis from genomically recoded bacteria enables multisite incorporation of noncanonical amino acids. *Nat. Commun.* **2018**, *9* (1), 1203.
10. Kwon, Y.-C.; Jewett, M. C., High-throughput preparation methods of crude extract for robust cell-free protein synthesis. *Sci. Rep.* **2015**, *5*, 8663.
11. Tong, X.; Li, T.; Orwenyo, J.; Toonstra, C.; Wang, L.-X., One-pot enzymatic glycan remodeling of a therapeutic monoclonal antibody by endoglycosidase s (endo-s) from streptococcus pyogenes. *Bioorg. Med. Chem.* **2018**, *26* (7), 1347-1355.
12. Higuchi, Y.; Eshima, Y.; Huang, Y.; Kinoshita, T.; Sumiyoshi, W.; Nakakita, S. I.; Takegawa, K., Highly efficient transglycosylation of sialo-complex-type oligosaccharide using coprinopsis cinerea endoglycosidase and sugar oxazoline. *Biotechnol. Lett.* **2017**, *39* (1), 157-162.
13. Huang, W.; Li, C.; Li, B.; Umekawa, M.; Yamamoto, K.; Zhang, X.; Wang, L. X., Glycosynthases enable a highly efficient chemoenzymatic synthesis of n-glycoproteins carrying intact natural n-glycans. *J. Am. Chem. Soc.* **2009**, *131* (6), 2214-2223.
14. Noguchi, M.; Tanaka, T.; Gyakushi, H.; Kobayashi, A.; Shoda, S., Efficient synthesis of sugar oxazolines from unprotected n-acetyl-2-amino sugars by using chloroformamidinium reagent in water. *J. Org. Chem.* **2009**, *74* (5), 2210-2212.
15. Ochiai, H.; Huang, W.; Wang, L. X., Expedient chemoenzymatic synthesis of homogeneous n-glycoproteins carrying defined oligosaccharide ligands. *J. Am. Chem. Soc.* **2008**, *130* (41), 13790-13803.
16. Baranova, N.; Loose, M., Single-molecule measurements to study polymerization dynamics of ftsz-



ftsa copolymers. *Methods Cell Biol.* **2017**, *137*, 355-370.

17. Eshima, Y.; Higuchi, Y.; Kinoshita, T.; Nakakita, S.-i.; Takegawa, K., Transglycosylation activity of glycosynthase mutants of endo- $\beta$ -n-acetylglucosaminidase from *coprinopsis cinerea*. *PLOS ONE* **2015**, *10* (7), e0132859.

18. Lin, C.-W.; Tsai, M.-H.; Li, S.-T.; Tsai, T.-I.; Chu, K.-C.; Liu, Y.-C.; Lai, M.-Y.; Wu, C.-Y.; Tseng, Y.-C.; Shivatare, S. S.; Wang, C.-H.; Chao, P.; Wang, S.-Y.; Shih, H.-W.; Zeng, Y.-F.; You, T.-H.; Liao, J.-Y.; Tu, Y.-C.; Lin, Y.-S.; Chuang, H.-Y.; Chen, C.-L.; Tsai, C.-S.; Huang, C.-C.; Lin, N.-H.; Ma, C.; Wu, C.-Y.; Wong, C.-H., A common glycan structure on immunoglobulin g for enhancement of effector functions. *Proc. Natl. Acad. Sci. U. S. A.* **2015**, *112* (34), 10611-10616.

19. Jian, W.; Edom, R. W.; Wang, D.; Weng, N.; Zhang, S., Relative quantitation of glycoisoforms of intact apolipoprotein c3 in human plasma by liquid chromatography–high-resolution mass spectrometry. *Anal. Chem.* **2013**, *85* (5), 2867-2874.
